# Supplementary material for: Installing amino acids and peptides on N-heterocycles under visible-light assistance
Source: PubMed Central journal article supplement (PMC4735789; doi:10.1038/srep20068), 2016-02-02

# Supporting Information

## Installing amino acids and peptides on *N*-heterocycles under visible-light assistance

Yunhe Jin, Min Jiang, Hui Wang and Hua Fu\*

Key Laboratory of Bioorganic Phosphorus Chemistry and Chemical Biology (Ministry of Education), Department of Chemistry, Tsinghua University, Beijing 100084, P. R. China. Fax: (+86) 10-62781695.

\*E-mail: fuhua@mail.tsinghua.edu.cn

### Table of contents

|                                                                                                          |     |
|----------------------------------------------------------------------------------------------------------|-----|
| General experimental procedures                                                                          | P2  |
| General procedure for synthesis of <i>N</i> -protected amino acid and peptide active esters ( <b>1</b> ) | P2  |
| General procedure for synthesis of substituted 2-isocyanobiphenyls ( <b>2</b> )                          | P2  |
| General procedure for synthesis of <i>N</i> -alkyl- <i>N</i> -phenylalkacrylamides ( <b>4</b> )          | P3  |
| General procedure for synthesis of compounds <b>3a-af</b> and <b>5a-e</b>                                | P3  |
| Characterization data of compounds <b>3a-af</b> and <b>5a-e</b>                                          | P4  |
| References                                                                                               | P21 |
| The <sup>1</sup> H and <sup>13</sup> C NMR spectra of compounds <b>3a-af</b> and <b>5a-e</b>             | P22 |

## General experimental procedures

Reactions were carried out under N<sub>2</sub> or Ar atmosphere. Proton magnetic resonance spectra (<sup>1</sup>H NMR) were recorded in the solvent of CDCl<sub>3</sub> using tetramethylsilane (TMS) as the internal standard (<sup>1</sup>H NMR: TMS at 0.00 ppm) and referencing to the residual proton resonance of CDCl<sub>3</sub> (7.26 ppm), and carbon magnetic resonance spectra (<sup>13</sup>C NMR) were recorded in the solvent of CDCl<sub>3</sub> referencing to the carbon resonance of CDCl<sub>3</sub> (77.2 ppm).

### General procedure for synthesis of *N*-protected amino acid and peptide active esters (1)<sup>1</sup>

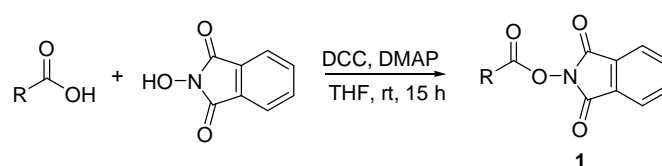

DCC (1.2 mmol) was added to a solution of *N*-protected amino acid or peptide (1 mmol), *N*-hydroxyphthalimide (1.1 mmol) and DMAP (0.1 mmol) in THF (5 mL). Reaction mixture was stirred at room temperature for 15 h, and the resulting mixture was filtered. The filtrate was evaporated by rotary evaporator, and the residue was purified by column chromatography on flash silica gel (CH<sub>2</sub>Cl<sub>2</sub> or CH<sub>2</sub>Cl<sub>2</sub>/EtOAc) to provide *N*-protected amino acid or peptide active ester (1).

### General procedure for synthesis of substituted 2-isocyanobiphenyls (2)<sup>2</sup>

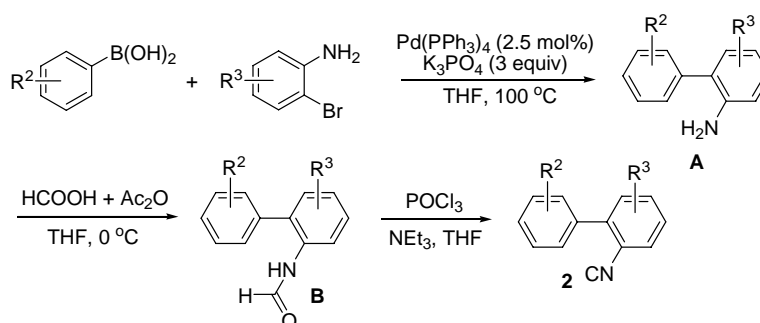

Pd(PPh<sub>3</sub>)<sub>4</sub> (0.025 mmol, 29 mg), aryl boronic acid (1.5 mmol), substituted 2-bromoaniline (1.0 mmol), K<sub>3</sub>PO<sub>4</sub> (3.0 mmol, 636 mg) and THF (5.0 mL) were added to a 25 mL two-neck flask under N<sub>2</sub> atmosphere. The reaction mixture was stirred at 100 °C for 12 h. After completion of the reaction, the resulting mixture was cooled to room temperature and filtered through a short path of silica gel, eluting with PE : EA (5: 1). The volatile compounds were removed in vacuo, and the residue was

dissolved in 4.0 mL of THF. After being cooled to 0 °C, acetic formic anhydride (10 mmol, 0.9 mL), which was prepared from the reaction of acetic anhydride with formic acid at 55 °C for 2 h, was added dropwise to the solution at 0 °C. After the addition was completed, the mixture was warmed to room temperature and stirred for 1 h. The mixture was treated with saturated aqueous solution of NaHCO<sub>3</sub> and extracted with EtOAc three times (3×5 mL). The combined organic phase was dried over anhydrous Na<sub>2</sub>SO<sub>4</sub> and concentrated under vacuum. The residue was dissolved in 3.0 mL of THF, and NEt<sub>3</sub> (6 mmol, 830 μL) was added. The solution was added to an over-dried two-neck flask under N<sub>2</sub> atmosphere. After the reaction mixture was cooled to 0 °C with ice bath, POCl<sub>3</sub> (8.7 mmol, 0.8 mL) was added *via* syring pump for a period of 2 h. The resulting mixture was stirred at 0 °C for an additional 1 h, and then the reaction was quenched with saturated aqueous solution of NaHCO<sub>3</sub>. The resulting solution was extracted with EtOAc (3×10 mL). The combined organic layer was dried over anhydrous Na<sub>2</sub>SO<sub>4</sub>, filtered and evaporated, and the residue was purified by a silica gel column chromatography to give substituted 2-isocyanobiphenyls (**2**).

**General procedure for synthesis of *N*-alkyl-*N*-phenylalkacrylamides (**4**)**

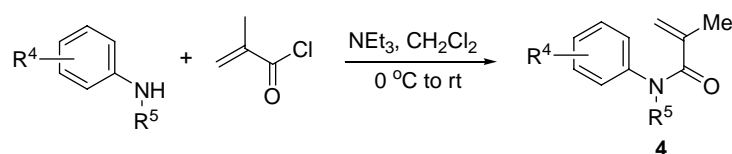

*N*-Alkyl phenylamine (1.0 mmol) and NEt<sub>3</sub> (1.5 mmol) was dissolved in anhydrous CH<sub>2</sub>Cl<sub>2</sub> (10 mL), and the solution was cooled to 0 °C. Methacryloyl chloride (1.1 mmol) in CH<sub>2</sub>Cl<sub>2</sub> (1.0 mL) was dropped to the solution, and the mixture was allowed to warm to room temperature and stirred overnight. The resulting solution was sequentially washed with 1N HCl (two times), saturated NaHCO<sub>3</sub> solution (two times) and brine. The organic layer was dried over Na<sub>2</sub>SO<sub>4</sub>, filtered and evaporated under vacuum. The residue was purified by a silica gel column chromatography to give *N*-alkyl-*N*-phenylalkacrylamides (**4**).

**General procedure for synthesis of compounds 3a-af and 5a-e**

[Ru(bpy)<sub>3</sub>]Cl<sub>2</sub> (1.5 μmol, 1.2 mg), **1** (0.45 mmol for synthesis of **3a-p**; 0.30 mmol for synthesis of the others), **2** (0.15 mmol) or **4** (0.15 mmol), DIPEA (0.6 mmol, 10 μL)

and  $K_2CO_3$  (0.18 mmol, 25 mg) were added to a 25-mL Schlenk tube with DMF (2.0 mL) or mixed solvent of  $CH_2Cl_2$  and DMF (2.0 mL,  $CH_2Cl_2/DMF$  (5:1)), and the tube was degassed by argon sparging for over 5 min. The tube was sealed, and then irradiated with a 40 W fluorescent lamp (approximately 2 cm away from the light source). After the complete conversion of the substrates (monitored by TLC), the reaction mixture was diluted with 20 mL of EtOAc, and the solution was filtered by flash chromatography. The filtrate was evaporated by rotary evaporator, and the residue was purified by silica gel column chromatography to give the desired product (**3a-af** and **5a-e**).

#### Characterization data of compounds **3a-ae** and **5a-e**

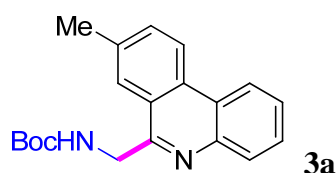

**tert-Butyl ((8-methylphenanthridin-6-yl)methyl)carbamate (3a).** Eluent: PE/EtOAc (15:1). Yield 30.9 mg (64%). White solid, mp 134-136 °C.  $^1H$  NMR ( $CDCl_3$ , 400 MHz)  $\delta$  8.46 (d,  $J = 8.2$  Hz, 2H), 8.11 (d,  $J = 8.2$  Hz, 1H), 7.88 (s, 1H), 7.70-7.60 (m, 3H), 6.62 (s, 1H), 4.97 (s, 1H), 2.56 (s, 2H), 1.56 (s, 9H).  $^{13}C$  NMR ( $CDCl_3$ , 100 MHz)  $\delta$  156.2, 154.4, 142.6, 137.8, 132.6, 130.6, 129.6, 128.3, 126.9, 124.2, 124.1, 122.4, 121.9, 79.5, 43.7, 28.6, 21.8. HRMS (ESI<sup>+</sup>): Calcd for  $C_{20}H_{22}N_2O_2$ ,  $[M+H]^+$  m/z 323.1754. Found 323.1752.

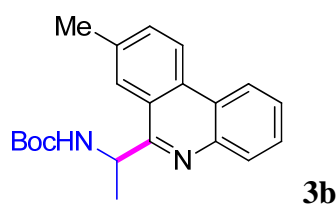

**tert-Butyl (1-(8-methylphenanthridin-6-yl)ethyl)carbamate (3b).** Eluent: PE/EtOAc (15:1). Yield 43.0 mg (85%). White solid, mp 162-164 °C.  $^1H$  NMR ( $CDCl_3$ , 400 MHz)  $\delta$  8.48 (t,  $J = 7.8$  Hz, 2H), 8.11 (d,  $J = 7.8$  Hz, 1H), 8.00 (s, 1H), 7.69-7.58 (m, 3H), 6.75 (d,  $J = 7.3$  Hz, 1H), 5.73 (q,  $J = 6.9$  Hz, 1H), 2.57 (s, 3H), 1.61 (d,  $J = 6.9$  Hz, 3H), 1.52 (s, 9H).  $^{13}C$  NMR ( $CDCl_3$ , 100 MHz)  $\delta$  160.1, 155.6, 142.7, 137.6, 132.4, 131.1, 129.7, 128.3, 126.8, 124.9, 124.0, 123.5, 122.6, 121.9,

79.3, 47.6, 28.6, 23.2, 21.9. HRMS (ESI<sup>+</sup>): Calcd for C<sub>21</sub>H<sub>24</sub>N<sub>2</sub>O<sub>2</sub>, [M+H]<sup>+</sup> m/z 337.1911. Found 337.1916.

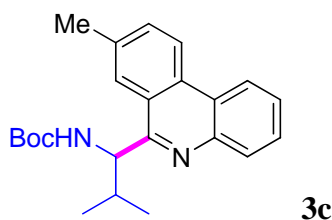

**tert-Butyl-(2-methyl-1-(8-methylphenanthridin-6-yl)propyl)carbamate (3c).**

Eluent: PE/EtOAc (15:1). Yield 44.4 mg (81%). White solid, mp 177-179 °C. <sup>1</sup>H NMR (CDCl<sub>3</sub>, 400 MHz) δ 8.47 (dd, *J*<sub>1</sub> = 6.0 Hz, *J*<sub>2</sub> = 7.3 Hz, 2H), 8.11 (d, *J* = 8.2 Hz, 1H), 8.06 (s, 1H), 7.68-7.57 (m, 3H), 6.38 (d, *J* = 8.7 Hz, 1H), 5.63 (dd, *J*<sub>1</sub> = 8.7 Hz, *J*<sub>2</sub> = 5.0 Hz, 1H), 2.58 (s, 3H), 2.32-2.25 (m, 1H), 1.48 (s, 9H), 1.08 (d, *J* = 6.8 Hz, 3H), 0.87 (d, *J* = 6.4 Hz, 3H). <sup>13</sup>C NMR (CDCl<sub>3</sub>, 100 MHz) δ 159.7, 156.4, 142.7, 137.4, 132.3, 130.9, 129.9, 128.2, 126.7, 125.3, 124.4, 123.9, 122.5, 121.8, 79.1, 55.5, 34.6, 28.6, 22.0, 20.7, 17.2. HRMS (ESI<sup>+</sup>): Calcd for C<sub>23</sub>H<sub>28</sub>N<sub>2</sub>O<sub>2</sub>, [M+H]<sup>+</sup> m/z 365.2224. Found 365.2220.

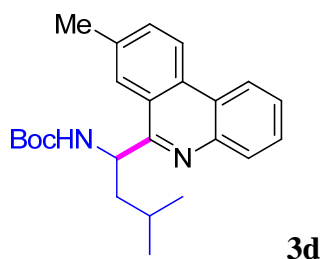

**tert-Butyl-(3-methyl-1-(8-methylphenanthridin-6-yl)butyl)carbamate (3d).**

Eluent: PE/EtOAc (15:1). Yield 48.9 mg (86%). White solid, mp 175-177 °C. <sup>1</sup>H NMR (CDCl<sub>3</sub>, 400 MHz) δ 8.48 (t, *J* = 7.8 Hz, 2H), 8.11-8.06 (m, 2H), 7.68-7.57 (m, 3H), 6.34 (d, *J* = 8.7 Hz, 1H), 5.81 (dd, *J*<sub>1</sub> = 7.8 Hz, *J*<sub>2</sub> = 6.0 Hz, 1H), 2.58 (s, 3H), 1.95-1.88 (m, 1H), 1.73-1.70 (m, 1H), 1.48 (s, 9H), 1.20 (d, *J* = 6.4 Hz, 3H), 0.91 (d, *J* = 6.9 Hz, 3H). <sup>13</sup>C NMR (CDCl<sub>3</sub>, 100 MHz) δ 160.6, 156.1, 142.9, 137.5, 132.3, 131.0, 129.8, 128.2, 126.7, 124.9, 124.0, 123.8, 122.5, 121.9, 79.2, 49.7, 47.1, 28.6, 25.4, 23.8, 22.3, 22.0. HRMS (ESI<sup>+</sup>): Calcd for C<sub>24</sub>H<sub>30</sub>N<sub>2</sub>O<sub>2</sub>, [M+H]<sup>+</sup> m/z 379.2380. Found 379.2375.

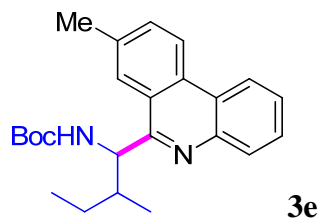

**tert-Butyl-(2-methyl-1-(8-methylphenanthridin-6-yl)butyl)carbamate (3e).** Eluent: PE/EtOAc (15:1). Yield 50.1 mg (88%). White solid, mp 145-147 °C. <sup>1</sup>H NMR (CDCl<sub>3</sub>, 400 MHz) δ 8.47 (m, 2H), 8.12-8.04 (m, 2H), 7.68-7.57 (m, 3H), 6.43 and 6.31 (d, *J* = 8.7 Hz, 1H), 5.79 and 5.65 (dd, *J*<sub>1</sub> = 8.7 Hz, *J*<sub>2</sub> = 5.5 Hz, 1H), 2.58 and 2.57 (s, 3H), 2.02 (m, 1H), 1.69 and 1.36 (m, 1H), 1.49 and 1.47 (s, 9H), 1.25-1.17 (m, 1H), 1.12-0.98 (m, 3H), 0.82-0.76 (m, 3H). <sup>13</sup>C NMR (CDCl<sub>3</sub>, 100 MHz) δ 160.0, 159.6, 156.5, 156.3, 142.7, 142.6, 137.7, 137.4, 132.3, 132.2, 131.0, 130.9, 129.9, 128.2, 126.7, 126.6, 125.3, 125.2, 124.6, 124.2, 123.9, 122.5, 122.4, 121.9, 79.1, 55.2, 53.9, 41.4, 41.2, 28.6, 27.8, 23.8, 22.0, 16.9, 13.8, 12.4, 11.8. HRMS (ESI<sup>+</sup>): Calcd for C<sub>24</sub>H<sub>30</sub>N<sub>2</sub>O<sub>2</sub>, [M+H]<sup>+</sup> m/z 379.2380. Found 379.2378.

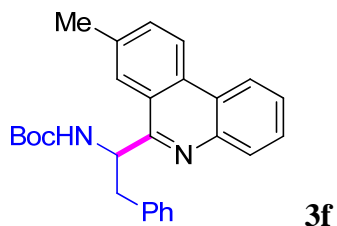

**tert-Butyl-(1-(8-methylphenanthridin-6-yl)-2-phenylethyl)carbamate (3f).** Eluent: PE/EtOAc (15:1). Yield 48.3 mg (78%). White solid, mp 116-118 °C. <sup>1</sup>H NMR (CDCl<sub>3</sub>, 400 MHz) δ 8.45 (t, *J* = 7.3 Hz, 2H), 8.06 (d, *J* = 7.8 Hz, 1H), 7.80 (s, 1H), 7.65-7.56 (m, 3H), 7.07 (s, 3H), 7.00 (s, 2H), 6.40 (d, *J* = 7.8 Hz, 1H), 5.93 (q, *J* = 6.9 Hz, 1H), 3.38 (dd, *J*<sub>1</sub> = 6.9 Hz, *J*<sub>2</sub> = 13.3 Hz, 1H), 3.26 (dd, *J*<sub>1</sub> = 5.5 Hz, *J*<sub>2</sub> = 13.3 Hz, 1H), 2.46 (s, 3H), 1.46 (s, 9H). <sup>13</sup>C NMR (CDCl<sub>3</sub>, 100 MHz) δ 158.9, 155.5, 142.8, 137.6, 137.3, 132.3, 130.8, 129.9, 129.8, 128.2, 128.0, 126.9, 126.4, 125.2, 124.2, 124.0, 122.3, 121.9, 79.4, 52.5, 43.1, 28.6, 21.8. HRMS (ESI<sup>+</sup>): Calcd for C<sub>27</sub>H<sub>28</sub>N<sub>2</sub>O<sub>2</sub>, [M+H]<sup>+</sup> m/z 413.2224. Found 413.2219.

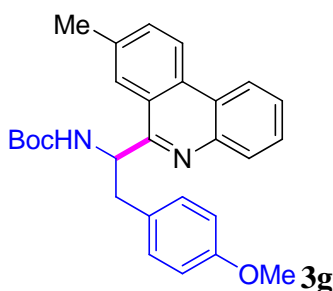

**tert-Butyl-(2-(4-methoxyphenyl)-1-(8-methylphenanthridin-6-yl)ethyl)carbamate (3g).** Eluent: PE/EtOAc (5:1). Yield 55.2 mg (83%). White solid, mp 138-140 °C. <sup>1</sup>H NMR (CDCl<sub>3</sub>, 400 MHz) δ 8.49 (dd,  $J_1 = 5.0$  Hz,  $J_2 = 8.2$  Hz, 2H), 8.07 (d,  $J = 7.3$  Hz, 1H), 7.82 (s, 1H), 7.69-7.59 (m, 3H), 6.85 (d,  $J = 8.2$  Hz, 2H), 6.62 (d,  $J = 8.2$  Hz, 2H), 6.40 (d,  $J = 8.6$  Hz, 1H), 5.88 (q,  $J = 6.4$  Hz, 1H), 3.70 (s, 3H), 3.28 (dd,  $J_1 = 6.9$  Hz,  $J_2 = 13.3$  Hz, 1H), 3.21 (dd,  $J_1 = 6.0$  Hz,  $J_2 = 13.3$  Hz, 1H), 2.48 (s, 3H), 1.46 (s, 9H). <sup>13</sup>C NMR (CDCl<sub>3</sub>, 100 MHz) δ 159.0, 158.2, 155.5, 142.8, 137.3, 134.3, 132.3, 130.8, 129.8, 129.7, 128.2, 126.8, 125.2, 124.2, 124.0, 122.3, 121.9, 113.4, 79.3, 55.2, 52.6, 42.1, 28.6, 21.8. HRMS (ESI<sup>+</sup>): Calcd for C<sub>28</sub>H<sub>30</sub>N<sub>2</sub>O<sub>3</sub>, [M+H]<sup>+</sup> m/z 443.2329. Found 443.2324.

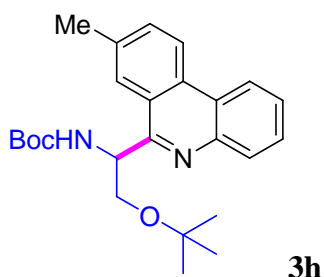

**tert-Butyl-(2-(tert-butoxy)-1-(8-methylphenanthridin-6-yl)ethyl)carbamate (3h).** Eluent: PE/EtOAc (15:1). Yield 19.6 mg (32%). White solid, mp 195-197 °C. <sup>1</sup>H NMR (CDCl<sub>3</sub>, 400 MHz) δ 8.51 (d,  $J = 8.7$  Hz, 2H), 8.24 (s, 1H), 8.12 (d,  $J = 8.7$  Hz, 1H), 7.71-7.59 (m, 3H), 6.41 (d,  $J = 7.3$  Hz, 1H), 5.81 (q,  $J = 6.6$  Hz, 1H), 3.84 (dd,  $J_1 = 5.5$  Hz,  $J_2 = 9.2$  Hz, 1H), 3.68 (dd,  $J_1 = 6.9$  Hz,  $J_2 = 9.2$  Hz, 1H), 2.60 (s, 3H), 1.49 (s, 9H), 0.98 (s, 9H). <sup>13</sup>C NMR (CDCl<sub>3</sub>, 100 MHz) δ 158.7, 155.7, 142.9, 137.0, 132.3, 130.7, 129.8, 128.1, 126.8, 126.5, 125.0, 124.1, 122.0, 121.9, 79.3, 73.2, 66.1, 51.8, 28.6, 27.3, 21.8. HRMS (ESI<sup>+</sup>): Calcd for C<sub>25</sub>H<sub>32</sub>N<sub>2</sub>O<sub>3</sub>, [M+H]<sup>+</sup> m/z 409.2486. Found 409.2483.

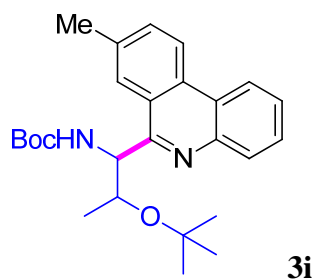

**3i**

***tert*-Butyl-(2-(*tert*-butoxy)-1-(8-methylphenanthridin-6-yl)propyl)carbamate (**3i**).**

Eluent: PE/EtOAc (15:1). Yield 56.5 mg (89%). White solid, mp 163-165 °C. <sup>1</sup>H NMR (CDCl<sub>3</sub>, 400 MHz) δ 8.55-8.47 (m, 2H), 8.28-8.22 (m, 1H), 8.17-8.06 (m, 1H) 7.71-7.58 (m, 3H), 6.54 and 6.36 (d, *J* = 7.3 Hz, 1H), 5.73-5.61 (m, 1H), 4.24-3.83 (m, 1H), 2.60 (s, 1H), 1.49 and 1.46 (s, 9H), 1.35 (brd, *J* = 6.9 Hz, 2H), 1.14 (brd, *J* = 5.5 Hz 1H), 1.05 (brs, 2.7H), 0.62 (brs, 6.3H). <sup>13</sup>C NMR (CDCl<sub>3</sub>, 100 MHz) δ 160.8, 157.8, 156.0, 155.9, 142.9, 142.7, 136.8, 132.2, 131.0, 130.3, 130.0, 129.7, 128.1, 128.0, 127.3, 126.8, 126.7, 126.5, 126.0, 125.2, 124.0, 122.2, 121.9, 121.8, 121.7, 79.2, 77.3, 74.2, 73.7, 72.7, 70.4, 55.7, 55.5, 28.6, 28.5, 28.2, 28.0, 22.0, 21.8, 20.5, 19.4. HRMS (ESI<sup>+</sup>): Calcd for C<sub>26</sub>H<sub>34</sub>N<sub>2</sub>O<sub>3</sub>, [M+H]<sup>+</sup> m/z 423.2642. Found 423.2639.

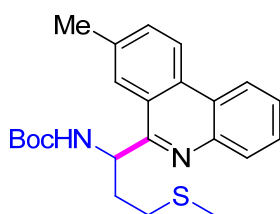

**3j**

***tert*-Butyl-(1-(8-methylphenanthridin-6-yl)-3-(methylthio)propyl)carbamate (**3j**).**

Eluent: PE/EtOAc (15:1). Yield 55.4 mg (93%). White solid, mp 161-163 °C. <sup>1</sup>H NMR (CDCl<sub>3</sub>, 400 MHz) δ 8.48 (t, *J* = 7.8 Hz, 2H), 8.11 (s, 1H), 8.09 (d, *J* = 7.8 Hz, 1H), 7.69-7.58 (m, 3H), 6.55 (d, *J* = 7.8 Hz, 1H), 5.92-5.85 (m, 1H), 2.78-2.69 (m, 1H), 2.58 (s, 3H), 2.55-2.46 (m, 1H), 2.38-2.28 (m, 1H), 2.12-2.00 (m, 4H), 1.50 (s, 9H). <sup>13</sup>C NMR (CDCl<sub>3</sub>, 100 MHz) δ 158.9, 156.0, 142.6, 137.7, 132.5, 131.0, 129.8, 128.3, 126.9, 124.9, 124.0, 123.7, 122.6, 121.9, 79.5, 50.4, 36.7, 30.6, 28.6, 21.9, 15.6. HRMS (ESI<sup>+</sup>): Calcd for C<sub>23</sub>H<sub>28</sub>N<sub>2</sub>O<sub>2</sub>S, [M+H]<sup>+</sup> m/z 397.1944. Found 397.1939.



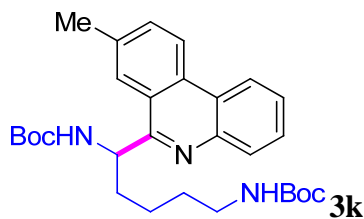

**Di-tert-butyl(1-(8-methylphenanthridin-6-yl)pentane-1,5-diy)dicarbamate (3k).**

Eluent: PE/EtOAc (5:1). Yield 60.1 mg (81%). White solid, mp 146-148 °C. <sup>1</sup>H NMR (CDCl<sub>3</sub>, 400 MHz) δ 8.48 (t, *J* = 8.7 Hz, 2H), 8.09 (d, *J* = 7.8 Hz, 1H), 7.99 (s, 1H), 7.68-7.57 (m, 3H), 6.54 (d, *J* = 7.8 Hz, 1H), 5.76-5.66 (m, 1H), 4.70 (s, 1H), 3.16-2.98 (m, 2H), 2.58 (s, 3H), 2.10-1.97 (m, 1H), 1.84-1.72 (m, 1H), 1.68-1.32 (m, 4H), 1.49 (s, 9H), 1.40 (s, 9H). <sup>13</sup>C NMR (CDCl<sub>3</sub>, 100 MHz) δ 159.5, 156.1, 142.6, 137.6, 132.5, 131.0, 129.8, 128.2, 126.8, 124.8, 124.0, 123.7, 122.6, 121.9, 79.4, 78.9, 50.7, 40.6, 36.9, 29.5, 28.6, 28.5, 22.8, 22.0. HRMS (ESI<sup>+</sup>): Calcd for C<sub>29</sub>H<sub>39</sub>N<sub>3</sub>O<sub>4</sub>, [M+H]<sup>+</sup> m/z 494.3013. Found 494.3010.

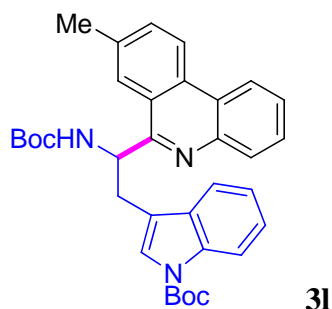

**tert-Butyl-3-(2-((tert-butoxycarbonyl)amino)-2-(8-methylphenanthridin-6-yl)ethyl)-1H-indole-1-carboxylate (3l).**

Eluent: PE/EtOAc (15:1). Yield 50.5 mg (61%). Clear oil. <sup>1</sup>H NMR (CDCl<sub>3</sub>, 400 MHz) δ 8.51-8.42 (m, 2H), 8.09-8.01 (m, 2H), 7.74 (s, 1H), 7.69-7.58 (m, 2H), 7.55 (d, *J* = 9.2 Hz, 1H), 7.41 (d, *J* = 7.3 Hz, 1H), 7.21 (t, *J* = 8.2 Hz, 1H), 7.08 (t, *J* = 7.3 Hz, 1H), 6.90 (s, 1H), 6.53 (d, *J* = 7.3 Hz, 1H), 6.02 (q, *J* = 7.8 Hz, 1H), 3.40 (d, *J* = 6.9 Hz, 2H), 2.32 (s, 3H), 1.50 (s, 9H), 1.49 (s, 9H). <sup>13</sup>C NMR (CDCl<sub>3</sub>, 100 MHz) δ 158.9, 155.6, 149.5, 142.7, 137.2, 135.4, 132.3, 131.2, 130.7, 129.8, 128.2, 126.9, 125.0, 124.3, 124.2, 124.1, 124.0, 122.5, 122.2, 121.8, 119.1, 116.4, 115.0, 83.0, 79.4, 51.1, 32.4, 28.6, 28.1, 21.6. HRMS (ESI<sup>+</sup>): Calcd for C<sub>34</sub>H<sub>37</sub>N<sub>3</sub>O<sub>4</sub>, [M+H]<sup>+</sup> m/z 552.2857. Found 552.2856.

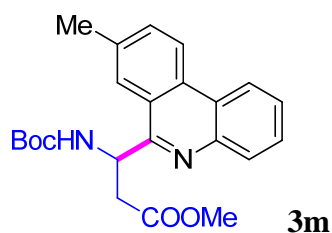

**Methyl-3-((*tert*-butoxycarbonyl)amino)-3-(8-methylphenanthridin-6-yl)propanoate (3m).** Eluent: PE/EtOAc (5:1). Yield 48.6 mg (82%). White solid, mp 162-164 °C. <sup>1</sup>H NMR (CDCl<sub>3</sub>, 400 MHz) δ 8.48 (t, *J* = 8.2 Hz, 2H), 8.18 (s, 1H), 8.06 (d, *J* = 7.8 Hz, 1H), 7.68-7.59 (m, 3H), 6.22 (d, *J* = 8.7 Hz, 1H), 6.15-6.07 (m, 1H), 3.66 (s, 3H), 3.11 (dd, *J*<sub>1</sub> = 5.5 Hz, *J*<sub>2</sub> = 14.6 Hz, 1H), 2.91 (dd, *J*<sub>1</sub> = 6.9 Hz, *J*<sub>2</sub> = 14.6 Hz, 1H), 2.59 (s, 3H), 1.48 (s, 9H). <sup>13</sup>C NMR (CDCl<sub>3</sub>, 100 MHz) δ 171.9, 157.8, 155.3, 142.6, 137.8, 132.6, 131.2, 129.9, 128.3, 127.1, 125.0, 124.2, 123.9, 122.5, 121.9, 79.8, 51.9, 49.0, 40.7, 28.5, 22.0. HRMS (ESI<sup>+</sup>): Calcd for C<sub>23</sub>H<sub>26</sub>N<sub>2</sub>O<sub>4</sub>, [M+H]<sup>+</sup> *m/z* 395.1965. Found 395.1966.

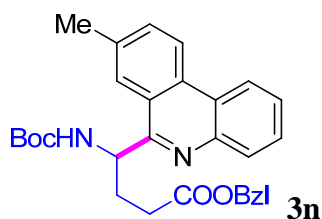

**Benzyl-4-((*tert*-butoxycarbonyl)amino)-4-(8-methylphenanthridin-6-yl)butanoate (3n).** Eluent: PE/EtOAc (5:1). Yield 55.3 mg (76%). Clear oil. <sup>1</sup>H NMR (CDCl<sub>3</sub>, 400 MHz) δ 8.48 (t, *J* = 7.3 Hz, 2H), 8.17 (s, 1H), 8.09 (d, *J* = 7.8 Hz, 1H), 7.68-7.59 (m, 3H), 7.33-7.25 (m, 5H), 6.61 (d, *J* = 7.3 Hz, 1H), 5.88-5.81 (m, 1H), 5.08 (d, *J* = 12.4 Hz, 1H), 5.00 (d, *J* = 12.4 Hz, 1H), 2.69-2.60 (m, 1H), 2.59 (s, 3H), 2.55-2.37 (m, 1H), 2.10-2.01 (m, 1H), 1.49 (s, 9H). <sup>13</sup>C NMR (CDCl<sub>3</sub>, 100 MHz) δ 173.3, 158.8, 156.0, 142.6, 137.8, 136.1, 132.6, 131.0, 129.8, 128.7, 128.6, 128.3, 128.2, 127.0, 125.1, 124.1, 123.8, 122.5, 121.9, 79.5, 66.3, 50.3, 31.7, 30.1, 28.6, 22.0. HRMS (ESI<sup>+</sup>): Calcd for C<sub>30</sub>H<sub>32</sub>N<sub>2</sub>O<sub>4</sub>, [M+H]<sup>+</sup> *m/z* 485.2435. Found 485.2434.

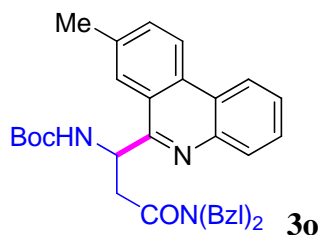

**tert-Butyl-(3-(dibenzylamino)-1-(8-methylphenanthridin-6-yl)-3-oxopropyl)carbamate (3o).** Eluent: PE/EtOAc (5:1). Yield 56.3 mg (67%). White solid, mp 181-183 °C.  $^1\text{H}$  NMR ( $\text{CDCl}_3$ , 400 MHz)  $\delta$  8.53 (d,  $J = 7.9$  Hz, 2H), , 8.40 (s, 1H), 8.01 (d,  $J = 7.6$  Hz, 1H), 7.68-7.61 (m, 3H), 7.37-6.98 (m, 10H), 6.39-6.33 (m, 1H), 5.80 (m, 1H), 4.63-4.35 (m, 4H), 3.62-3.55 (m, 1H), 3.16-3.09 (m, 1H), 2.61 (s, 3H), 1.44 (s, 9H).  $^{13}\text{C}$  NMR ( $\text{CDCl}_3$ , 100 MHz)  $\delta$  171.6, 159.2, 155.2, 142.7, 137.9, 137.2, 136.8, 132.6, 131.2, 129.8, 129.0, 128.5, 128.2, 128.1, 127.6, 127.2, 127.0, 126.7, 125.9, 124.6, 124.5, 122.3, 122.0, 79.7, 50.2, 49.4, 48.1, 37.9, 28.5, 22.0. HRMS ( $\text{ESI}^+$ ): Calcd for  $\text{C}_{36}\text{H}_{37}\text{N}_3\text{O}_3$ ,  $[\text{M}+\text{H}]^+$   $m/z$  560.2908. Found 560.2905.

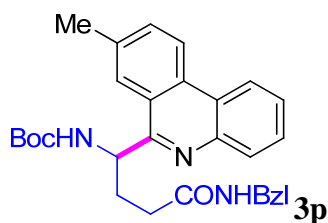

**tert-Butyl-(4-(benzylamino)-1-(8-methylphenanthridin-6-yl)-4-oxobutyl)carbamate (3p).** Eluent: PE/EtOAc (1:1). Yield 54.5 mg (75%). White solid, mp 176-178 °C.  $^1\text{H}$  NMR ( $\text{CDCl}_3$ , 400 MHz)  $\delta$  8.51 (dd,  $J_1 = 4.1$  Hz,  $J_2 = 7.8$  Hz, 2H), 8.08 (d,  $J = 7.8$  Hz, 1H), 7.94 (s, 1H), 7.70-7.61 (m, 3H), 7.39-7.23 (m, 5H), 7.11(s, 1H), 6.81 (d,  $J = 7.3$  Hz, 1H), 5.74 (t,  $J = 7.3$  Hz, 1H), 4.56 (dd,  $J_1 = 5.5$  Hz,  $J_2 = 15.1$  Hz, 1H), 4.50 (dd,  $J_1 = 5.5$  Hz,  $J_2 = 15.1$  Hz, 1H), 2.59-2.41 (m, 2H), 2.54 (s, 3H), 2.38-2.27 (m, 1H), 2.02-1.88 (m, 1H), 1.50 (s, 9H).  $^{13}\text{C}$  NMR ( $\text{CDCl}_3$ , 100 MHz)  $\delta$  172.8, 158.7, 156.8, 142.4, 138.7, 138.0, 132.7, 131.0, 129.7, 128.7, 128.3, 127.9, 127.4, 127.0, 125.0, 124.2, 123.5, 122.5, 122.0, 79.8, 50.6, 43.8, 34.1, 33.2, 28.5, 22.0. HRMS ( $\text{ESI}^+$ ): Calcd for  $\text{C}_{30}\text{H}_{33}\text{N}_3\text{O}_3$ ,  $[\text{M}+\text{H}]^+$   $m/z$  484.2595. Found 484.2594.

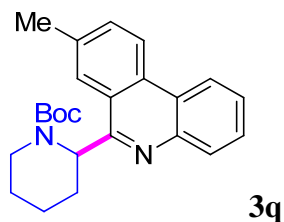

**tert-Butyl-2-(8-methylphenanthridin-6-yl)piperidine-1-carboxylate (3q).** Eluent: PE/EtOAc (15:1). Yield 51.5 mg (91%). White solid, mp 123-125 °C. <sup>1</sup>H NMR (CDCl<sub>3</sub>, 400 MHz) δ 8.48 (t, *J* = 8.7 Hz, 2H), 8.09 (d, *J* = 8.2 Hz, 2H), 7.66-7.56 (m, 3H), 6.15 (m, 1H), 4.00 (m, 1H), 3.60 (m, 1H), 2.56 (s, 3H), 2.34 (m, 1H), 2.11-1.82 (m, 2H), 1.78-1.50 (m, 3H), 1.36 (s, 9H). <sup>13</sup>C NMR (CDCl<sub>3</sub>, 100 MHz) δ 160.7, 156.2, 142.8, 137.1, 131.8, 131.0, 130.4, 128.0, 126.6, 125.3, 124.5, 123.8, 122.5, 121.7, 79.4, 52.9, 42.6, 28.6, 28.5, 25.6, 22.0, 19.8. HRMS (ESI<sup>+</sup>): Calcd for C<sub>24</sub>H<sub>28</sub>N<sub>2</sub>O<sub>2</sub>, [M+H]<sup>+</sup> m/z 377.2224. Found 377.2224.

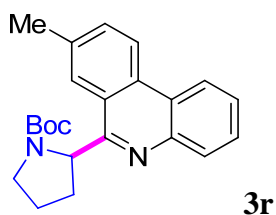

**tert-Butyl-2-(8-methylphenanthridin-6-yl)pyrrolidine-1-carboxylate (3r).** Eluent: PE/EtOAc (5:1). Yield 49.5 mg (91%). White solid, mp 201-203 °C. The product gives two sets of NMR signals, owing to the presence of rotamers around the tertiary amide.<sup>3</sup> <sup>1</sup>H NMR (CDCl<sub>3</sub>, 400 MHz) δ 8.56-8.49 (m, 2H), 8.09-8.00 (m, 2H), 7.67-7.59 (m, 3H), 5.90-5.70 (m, 1H), 4.01-3.90 (m, 1H), 3.79-3.58 (m, 1H), 2.61-2.42 (m, 4H), 2.08-1.95 (m, 3H), 1.47 (brs, 3.5H), 0.94 (brs, 5.5H). <sup>13</sup>C NMR (CDCl<sub>3</sub>, 100 MHz) δ 160.9, 160.0, 154.9, 154.8, 143.3, 143.2, 137.0, 131.9, 131.8, 131.2, 130.9, 130.3, 128.2, 127.8, 126.4, 126.3, 124.8, 124.6, 124.3, 124.1, 123.7, 122.6, 121.7, 79.0, 78.8, 59.9, 59.3, 47.2, 47.0, 33.4, 32.2, 28.7, 28.1, 23.8, 23.5, 22.0. HRMS (ESI<sup>+</sup>): Calcd for C<sub>23</sub>H<sub>26</sub>N<sub>2</sub>O<sub>2</sub>, [M+H]<sup>+</sup> m/z 363.2067. Found 363.2063.

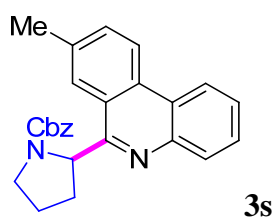

**Benzyl-2-(8-methylphenanthridin-6-yl)pyrrolidine-1-carboxylate (3s).** Eluent: PE/EtOAc (5:1). Yield 54.8 mg (92%). White solid, mp 111-113 °C. <sup>1</sup>H NMR (CDCl<sub>3</sub>, 400 MHz) δ 8.52-8.42 (m, 2H), 8.06-7.94 (m, 2H), 7.79-7.54 (m, 4H), 7.42-7.28 (m, 2H), 6.79 and 6.65 (d, *J* = 7.3 Hz, 2H), 5.96 and 5.85 (d, *J* = 7.8 Hz, 1H), 5.22 and 5.12 (d, *J* = 12.8 Hz, 1H), 4.98 and 4.82 (d, *J* = 12.8 Hz, 1H), 4.10-3.99 (m, 1H), 3.84-3.69 (m, 1H), 2.60-2.43 (m, 4H), 2.15-1.91 (m, 3H). <sup>13</sup>C NMR (CDCl<sub>3</sub>, 100 MHz) δ 160.1, 159.7, 156.2, 143.2, 137.1, 136.9, 134.2, 132.0, 131.2, 130.6, 130.5, 128.5, 128.2, 127.9, 127.8, 127.7, 127.1, 126.9, 126.6, 126.5, 124.8, 124.6, 124.2, 124.1, 124.0, 123.9, 123.5, 122.7, 122.6, 121.7, 121.6, 66.6, 66.3, 59.6, 59.5, 47.7, 47.0, 33.4, 32.3, 23.8, 23.2, 22.0. HRMS (ESI<sup>+</sup>): Calcd for C<sub>26</sub>H<sub>24</sub>N<sub>2</sub>O<sub>2</sub>, [M+H]<sup>+</sup> m/z 397.1911 Found 397.1909.

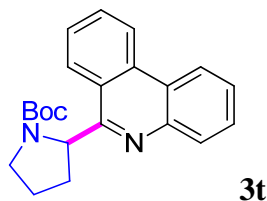

**tert-Butyl-2-(phenanthridin-6-yl)pyrrolidine-1-carboxylate (3t).** Eluent: PE/EtOAc (5:1). Yield 48.2 mg (92%). White solid, mp 146-148 °C. <sup>1</sup>H NMR (CDCl<sub>3</sub>, 400 MHz) δ 8.69-8.60 (m, 1H), 8.57-8.48 (m, 1H), 8.29-8.23 (m, 1H), 8.12-8.04 (m, 1H), 7.85-7.76 (m, 1H), 7.72-7.56 (m, 3H), 5.92-5.68 (m, 1H), 4.00-3.87 (m, 1H), 3.76-3.59 (m, 1H), 2.58-2.44 (m, 1H), 2.15-1.86 (m, 3H), 1.47 (brs, 2.9H), 0.93 (brs, 6.1H). <sup>13</sup>C NMR (CDCl<sub>3</sub>, 100 MHz) δ 161.3, 160.2, 154.9, 154.8, 143.6, 143.5, 133.4, 133.2, 130.4, 130.2, 130.1, 128.6, 128.3, 127.2, 127.1, 126.5, 126.4, 125.3, 125.0, 124.1, 124.0, 123.9, 123.6, 122.8, 122.7, 121.9, 79.1, 78.8, 60.2, 59.4, 47.2, 47.0, 33.4, 32.3, 28.7, 28.1, 23.8, 23.5. HRMS (ESI<sup>+</sup>): Calcd for C<sub>22</sub>H<sub>24</sub>N<sub>2</sub>O<sub>2</sub>, [M+H]<sup>+</sup> m/z 349.1911. Found 349.1915.

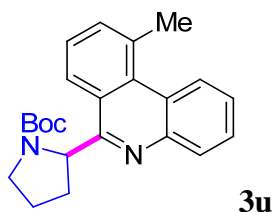

**tert-Butyl-2-(10-methylphenanthridin-6-yl)pyrrolidine-1-carboxylate (3u).** Eluent:

PE/EtOAc (5:1). Yield 27.2 mg (50%). White solid, mp 131-133 °C. <sup>1</sup>H NMR (CDCl<sub>3</sub>, 400 MHz) δ 8.81-8.73 (m, 1H), 8.20-8.09 (m, 2H), 7.71-7.53 (m, 4H), 5.92-5.71 (m, 1H), 4.01-3.88 (m, 1H), 3.76-3.59 (m, 1H), 3.14 and 3.10 (s, 3H), 2.60-2.43 (m, 1H), 2.12-1.87 (m, 3H), 1.48 (brs, 3.1H), 0.95 (brs, 5.9H). <sup>13</sup>C NMR (CDCl<sub>3</sub>, 100 MHz) δ 161.4, 160.4, 155.0, 154.9, 144.8, 144.7, 135.9, 135.8, 134.4, 134.3, 132.7, 130.8, 127.9, 127.6, 126.6, 126.5, 126.4, 125.7, 125.5, 125.4, 125.3, 125.1, 123.7, 123.4, 79.0, 78.7, 60.3, 59.8, 47.2, 47.0, 33.3, 32.3, 28.7, 28.2, 27.1, 27.0, 23.7, 23.4. HRMS (ESI<sup>+</sup>): Calcd for C<sub>23</sub>H<sub>26</sub>N<sub>2</sub>O<sub>2</sub>, [M+H]<sup>+</sup> m/z 363.2067. Found 363.2066.

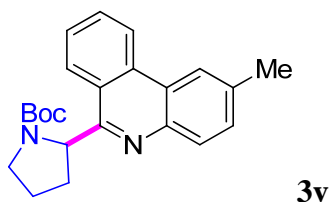

**tert-Butyl-2-(2-methylphenanthridin-6-yl)pyrrolidine-1-carboxylate (3v).** Eluent: PE/EtOAc (5:1). Yield 50.2 mg (92%). White solid, mp 178-180 °C. <sup>1</sup>H NMR (CDCl<sub>3</sub>, 400 MHz) δ 8.67-8.59 (m, 1H), 8.33-8.20 (m, 2H), 8.01-7.93 (m, 1H), 7.82-7.74 (m, 1H), 7.67-7.61 (m, 1H), 7.53-7.46 (m, 1H), 5.89-5.66 (m, 1H), 3.98-3.88 (m, 1H), 3.76-3.59 (m, 1H), 2.63-2.43 (m, 4H), 2.14-1.87 (m, 3H), 1.47 (brs, 2.7H), 0.92 (brs, 6.3H). <sup>13</sup>C NMR (CDCl<sub>3</sub>, 100 MHz) δ 160.2, 159.2, 154.9, 154.8, 142.0, 141.8, 136.3, 136.1, 133.2, 132.9, 130.3, 130.1, 130.0, 129.8, 127.0, 126.9, 125.2, 125.0, 124.0, 123.8, 123.4, 122.7, 122.6, 121.5, 79.0, 78.8, 60.2, 59.4, 47.2, 47.0, 33.4, 32.2, 28.7, 28.1, 23.8, 23.5, 22.0. HRMS (ESI<sup>+</sup>): Calcd for C<sub>23</sub>H<sub>26</sub>N<sub>2</sub>O<sub>2</sub>, [M+H]<sup>+</sup> m/z 363.2067. Found 363.2070.

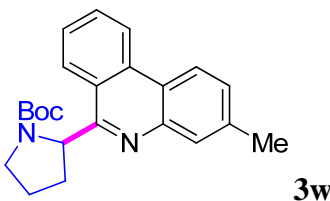

**tert-Butyl-2-(3-methylphenanthridin-6-yl)pyrrolidine-1-carboxylate (3w).** Eluent: PE/EtOAc (5:1). Yield 51.2 mg (94%). White solid, mp 132-134 °C. <sup>1</sup>H NMR (CDCl<sub>3</sub>, 400 MHz) δ 8.64-8.53 (m, 1H), 8.43-8.34 (m, 1H), 8.27-8.19 (m, 1H), 7.93-7.57 (m, 3H), 7.46-7.37 (m, 1H), 5.92-5.68 (m, 1H), 4.00-3.87 (m, 1H), 3.77-3.59 (m, 1H), 2.59-2.42 (m, 4H), 2.14-1.87 (m, 3H), 1.48 (brs, 3.1H), 0.94 (brs, 5.9H). <sup>13</sup>C NMR

(CDCl<sub>3</sub>, 100 MHz)  $\delta$  161.2, 160.3, 154.9, 154.8, 143.8, 143.6, 138.8, 138.4, 134.2, 134.0, 133.4, 133.2, 130.1, 130.0, 129.9, 128.3, 128.1, 126.7, 126.6, 125.3, 125.0, 123.8, 123.6, 122.5, 122.4, 121.7, 121.3, 79.0, 78.8, 60.1, 59.4, 47.2, 47.0, 33.4, 32.3, 28.4, 28.1, 23.8, 23.5, 21.6. HRMS (ESI<sup>+</sup>): Calcd for C<sub>23</sub>H<sub>26</sub>N<sub>2</sub>O<sub>2</sub>, [M+H]<sup>+</sup> m/z 363.2067. Found 363.2067.

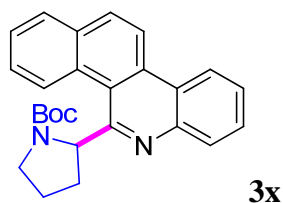

***tert*-Butyl-2-(benzo[*i*]phenanthridin-5-yl)pyrrolidine-1-carboxylate (3x).**

PE/EtOAc (5:1). Yield 52.7 mg (88%). White solid, mp 150-152 °C. <sup>1</sup>H NMR (CDCl<sub>3</sub>, 400 MHz)  $\delta$  8.62-8.51 (m, 3H), 8.15-7.95 (m, 3H), 7.76-7.57 (m, 4H), 6.31-5.99 (m, 1H), 4.13-3.99 (m, 1H), 3.73-3.60 (m, 1H), 2.88-2.54 (m, 2H), 2.39-2.04 (m, 2H), 1.38 (brs, 2.7H), 0.53 (brs, 6.3H). <sup>13</sup>C NMR (CDCl<sub>3</sub>, 100 MHz)  $\delta$  162.6, 160.8, 154.8, 154.1, 144.3, 143.9, 134.0, 133.5, 133.2, 133.1, 131.8, 131.5, 130.0, 129.6, 129.2, 128.9, 128.8, 128.5, 127.6, 127.5, 127.0, 126.8, 126.5, 126.4, 126.3, 126.2, 123.3, 123.0, 122.6, 122.3, 122.2, 121.8, 120.6, 120.4, 78.8, 78.2, 62.7, 61.8, 47.9, 47.8, 34.1, 33.1, 28.4, 27.6, 23.6, 23.4. HRMS (ESI<sup>+</sup>): Calcd for C<sub>26</sub>H<sub>26</sub>N<sub>2</sub>O<sub>2</sub>, [M+H]<sup>+</sup> m/z 399.2067. Found 399.2071.

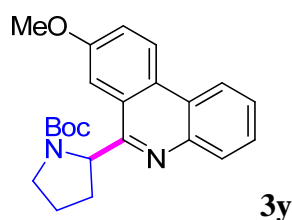

***tert*-Butyl-2-(8-methoxyphenanthridin-6-yl)pyrrolidine-1-carboxylate (3y).**

PE/EtOAc (4:1). Yield 54.1 mg (95%). White solid, mp 159-161 °C. <sup>1</sup>H NMR (CDCl<sub>3</sub>, 400 MHz)  $\delta$  8.60-8.51 (m, 1H), 8.47-8.40 (m, 1H), 8.09-8.02 (m, 1H), 7.65-7.52 (m, 3H), 7.48-7.40 (m, 1H), 5.85-5.61 (m, 1H), 4.02-3.87 (m, 4H), 2.58-2.43 (m, 1H), 2.17-1.89 (m, 3H), 1.47 (brs, 3.2H), 0.93 (brs, 5.8H). <sup>13</sup>C NMR (CDCl<sub>3</sub>, 100 MHz)  $\delta$  160.3, 159.3, 158.5, 155.0, 154.7, 142.8, 142.7, 130.4, 130.3, 127.8, 127.7, 127.5, 127.3, 126.6, 126.4, 125.3, 125.1, 124.4, 124.3, 124.1, 123.7, 121.4, 120.5, 120.3,

105.8, 79.1, 78.8, 60.6, 59.6, 55.7, 55.6, 47.1, 47.0, 33.1, 31.9, 28.7, 28.1, 23.8, 23.5. HRMS (ESI<sup>+</sup>): Calcd for C<sub>23</sub>H<sub>26</sub>N<sub>2</sub>O<sub>3</sub>, [M+H]<sup>+</sup> m/z 379.2016. Found 379.2016.

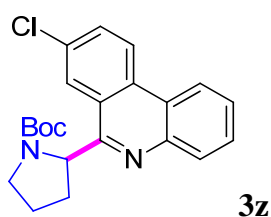

**tert-Butyl-2-(8-chlorophenanthridin-6-yl)pyrrolidine-1-carboxylate (3z).** Eluent: PE/EtOAc (5:1). Yield 54.1 mg (94%). White solid, mp 188-190 °C. <sup>1</sup>H NMR (CDCl<sub>3</sub>, 400 MHz) δ 8.62-8.41 (m, 2H), 8.22 (m, 2H), 8.13-8.04 (m, 1H), 7.80-7.55 (m, 3H), 5.82-5.62 (m, 1H), 3.99-3.86 (m, 1H), 3.77-3.60 (m, 1H), 2.61-2.43 (m, 1H), 2.14-1.97 (m, 3H), 1.47 (brs, 3.6H), 0.96 (brs, 5.4H). <sup>13</sup>C NMR (CDCl<sub>3</sub>, 100 MHz) δ 160.4, 159.4, 154.8, 154.6, 143.6, 143.4, 133.2, 131.8, 131.5, 130.8, 130.7, 130.5, 129.0, 128.7, 127.0, 126.8, 124.9, 124.7, 124.5, 124.4, 123.4, 123.0, 121.8, 79.2, 78.9, 59.6, 59.3, 47.2, 47.0, 33.4, 32.2, 28.7, 28.1, 23.9, 23.5. HRMS (ESI<sup>+</sup>): Calcd for C<sub>22</sub>H<sub>23</sub>N<sub>2</sub>O<sub>2</sub>Cl, [M+H]<sup>+</sup> m/z 383.1521. Found 383.1517.

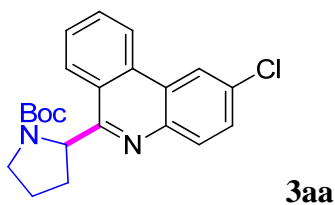

**tert-Butyl-2-(2-chlorophenanthridin-6-yl)pyrrolidine-1-carboxylate (3aa).** Eluent: PE/EtOAc (5:1). Yield 53.5 mg (93%). White solid, mp 198-200 °C. <sup>1</sup>H NMR (CDCl<sub>3</sub>, 400 MHz) δ 8.59-8.45 (m, 2H), 8.29-8.24 (m, 1H), 8.06-7.97 (m, 1H), 7.87-7.78 (m, 1H), 7.74-7.57 (m, 2H), 5.88-5.69 (m, 1H), 3.97-3.87 (m, 1H), 3.76-3.59 (m, 1H), 2.58-2.46 (m, 3H), 1.47 (brs, 3.1H), 0.92 (brs, 5.9H). <sup>13</sup>C NMR (CDCl<sub>3</sub>, 100 MHz) δ 161.8, 160.7, 154.9, 124.6, 142.1, 142.0, 132.4, 132.2, 132.1, 131.8, 130.5, 130.4, 129.2, 128.8, 127.9, 127.8, 125.4, 125.1, 124.7, 124.3, 124.1, 122.8, 122.7, 121.6, 79.2, 78.8, 60.0, 59.4, 47.2, 47.0, 33.3, 32.2, 28.7, 28.1, 23.8, 23.5. HRMS (ESI<sup>+</sup>): Calcd for C<sub>22</sub>H<sub>23</sub>N<sub>2</sub>O<sub>2</sub>Cl, [M+H]<sup>+</sup> m/z 383.1521. Found 383.1523.



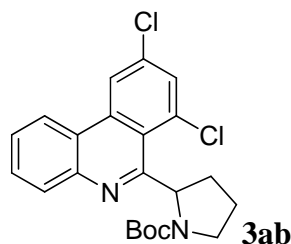

***tert*-Butyl-2-(7,9-dichlorophenanthridin-6-yl)pyrrolidine-1-carboxylate (3ab).**

Eluent: PE/EtOAc (8:1). Yield 39.4 mg (63%). White solid, mp 139-141 °C. <sup>1</sup>H NMR (CDCl<sub>3</sub>, 400 MHz) δ 8.57 and 8.53 (s, 1H), 8.47-8.32 (m, 1H), 8.09-7.96 (m, 1H), 7.82-7.55 (m, 3H), 6.52-6.32 (m, 1H), 4.02-3.85 (m, 1H), 3.70-3.53 (m, 1H), 2.68-2.46 (m, 1H), 2.32-1.83 (m, 3H), 1.46 (brs, 3.4H), 0.93 (brs, 5.6H). <sup>13</sup>C NMR (CDCl<sub>3</sub>, 100 MHz) δ 160.6, 159.0, 155.0, 154.5, 143.1, 143.0, 137.4, 137.0, 135.7, 135.6, 133.0, 132.8, 130.7, 130.4, 130.3, 130.0, 129.7, 127.4, 127.2, 122.3, 122.2, 122.1, 121.7, 121.6, 121.3, 121.2, 78.9, 78.5, 62.4, 62.0, 47.4, 47.3, 34.0, 33.3, 28.7, 28.1, 22.7, 22.5. HRMS (ESI<sup>+</sup>): Calcd for C<sub>22</sub>H<sub>22</sub>N<sub>2</sub>O<sub>2</sub>Cl<sub>2</sub>, [M+H]<sup>+</sup> m/z 417.1131. Found 417.1131.

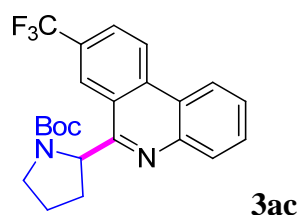

***tert*-Butyl-2-(8-(trifluoromethyl)phenanthridin-6-yl)pyrrolidine-1-carboxylate**

**(3ac).** PE/EtOAc (5:1). Yield 56.3 mg (90%). White solid, mp 164-166 °C. <sup>1</sup>H NMR (CDCl<sub>3</sub>, 400 MHz) δ 8.81-8.68 (m, 1H), 8.59-8.47 (m, 2H), 8.17-8.08 (m, 1H), 8.06-7.94 (m, 1H), 7.81-7.59 (m, 2H), 5.91-5.72 (m, 1H), 4.01-3.87 (m, 1H), 3.80-3.63 (m, 1H), 2.64-2.47 (m, 1H), 2.19-1.92 (m, 3H), 1.46 (brs, 3.8H), 0.93 (brs, 5.2H). <sup>13</sup>C NMR (CDCl<sub>3</sub>, 100 MHz) δ 161.5, 160.4, 154.8, 154.5, 144.2, 135.6, 135.3, 130.6, 129.9, 129.6, 129.0 (q, *J* = 33.6 Hz), 127.2, 127.0, 126.1, 124.1 (q, *J* = 272.2 Hz), 123.9, 123.8, 123.3, 123.0, 122.6, 122.4, 122.3, 79.3, 79.0, 59.6, 59.4, 47.2, 47.1, 33.6, 32.4, 28.6, 28.1, 23.9, 23.6. HRMS (ESI<sup>+</sup>): Calcd for C<sub>23</sub>H<sub>23</sub>N<sub>2</sub>O<sub>2</sub>F<sub>3</sub>, [M+H]<sup>+</sup> m/z 417.1784. Found 417.1782.

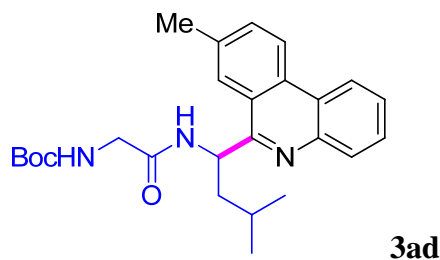

**tert-Butyl-(2-((3-methyl-1-(8-methylphenanthridin-6-yl)butyl)amino)-2-oxoethyl)carbamate (3ad).** Eluent: PE/EtOAc (2:1). Yield 47.1 mg (72%). White solid, mp 99-101 °C. <sup>1</sup>H NMR (CDCl<sub>3</sub>, 400 MHz) δ 8.53 (t, *J* = 8.7 Hz, 2H), 8.10-8.06 (m, 1H), 7.82 (s, 1H), 7.71-7.63 (m, 3H), 6.16-6.08 (m, 1H), 5.24 (s, 1H), 3.95 (s, 2H), 2.62 (s, 3H), 1.90-1.69 (m, 3H), 1.47 (s, 9H), 1.20 (d, *J* = 6.0 Hz, 3H), 0.87 (d, *J* = 6.4 Hz, 3H). <sup>13</sup>C NMR (CDCl<sub>3</sub>, 100 MHz) δ 168.8, 159.7, 155.9, 142.6, 137.7, 132.6, 131.1, 129.6, 128.3, 126.9, 124.8, 124.0, 123.7, 122.6, 121.9, 80.0, 48.3, 46.8, 44.5, 28.4, 25.3, 23.7, 22.2, 22.0. HRMS (ESI<sup>+</sup>): Calcd for C<sub>26</sub>H<sub>33</sub>N<sub>3</sub>O<sub>3</sub>, [M+H]<sup>+</sup> *m/z* 436.2595. Found 436.2593.

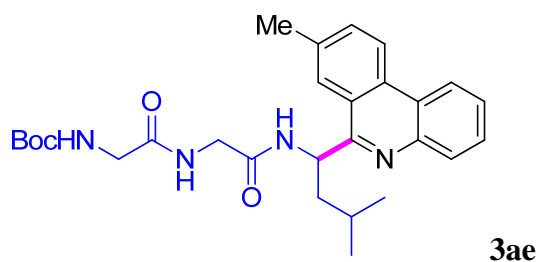

**tert-Butyl-(2-((2-((3-methyl-1-(8-methylphenanthridin-6-yl)butyl)amino)-2-oxoethyl)amino)-2-oxoethyl)carbamate (3ae).** Eluent: DCM/MeOH (20:1). Yield 50.3 mg (68%). White solid, mp 81-83 °C. <sup>1</sup>H NMR (CDCl<sub>3</sub>, 400 MHz) δ 8.51 (dd, *J*<sub>1</sub> = 8.7 Hz, *J*<sub>2</sub> = 11.0 Hz, 2H), 8.09 (d, *J* = 7.8 Hz, 1H), 8.02 (s, 1H), 7.06 (s, 1H), 7.72-7.61 (m, 3H), 6.94 (s, 1H), 6.14-6.06 (m, 1H), 5.26 (s, 1H), 4.13 (d, *J* = 5.0 Hz, 2H), 3.90 (d, *J* = 5.0 Hz, 2H), 2.61 (s, 3H), 1.83-1.72 (m, 3H), 1.44 (s, 9H), 1.19 (d, *J* = 6.0 Hz, 3H), 0.87 (d, *J* = 6.4 Hz, 3H). <sup>13</sup>C NMR (CDCl<sub>3</sub>, 100 MHz) δ 169.7, 167.9, 159.5, 156.0, 137.7, 132.7, 132.6, 131.2, 129.5, 128.5, 127.0, 124.7, 124.0, 123.6, 122.7, 121.9, 80.2, 48.6, 46.6, 44.2, 43.0, 28.4, 25.4, 23.7, 22.1, 22.0. HRMS (ESI<sup>+</sup>): Calcd for C<sub>28</sub>H<sub>36</sub>N<sub>4</sub>O<sub>4</sub>, [M+H]<sup>+</sup> *m/z* 493.2809. Found 493.2808.

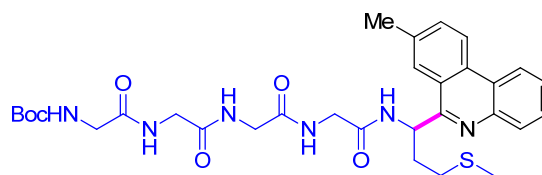

**tert-Butyl-(5-(8-methylphenanthridin-6-yl)-7,10,13,16-tetraoxo-2-thia-6,9,12,15-tetraazaheptadecan-17-yl)carbamate (3af).** Eluent: DCM/MeOH (10:1). Yield 64.4 mg (69 %). White solid, mp 125-127 °C. <sup>1</sup>H NMR (DMSO-*d*<sub>6</sub>, 400 MHz) δ 8.80-8.72 (m, 2H), 8.49 (d, *J* = 8.7 Hz, 1H), 8.29 (s, 1H), 8.22-8.15 (m, 2H), 8.12-8.03 (m, 2H), 7.82-7.67 (m, 3H), 7.02 (t, *J* = 6.0 Hz, 1H), 6.10-5.99 (m, 1H), 3.89-3.73 (m, 6H), 3.60 (d, *J* = 6.0 Hz, 2H), 2.68-2.54 (m, 5H), 2.39-2.28 (m, 1H), 2.21-2.11 (m, 1H), 2.08 (s, 3H), 1.38 (s, 9H). <sup>13</sup>C NMR (DMSO-*d*<sub>6</sub>, 100 MHz) δ 170.3, 169.8, 169.6, 168.9, 159.8, 156.4, 142.8, 138.1, 133.2, 130.9, 129.9, 129.0, 127.6, 125.3, 124.4, 124.1, 123.4, 123.0, 78.6, 49.4, 43.9, 42.6, 34.4, 30.7, 28.7, 22.0, 15.2. HRMS (ESI<sup>+</sup>): Calcd for C<sub>31</sub>H<sub>40</sub>N<sub>6</sub>O<sub>6</sub>S, [M+H]<sup>+</sup> 625.2803. Found *m/z* 625.2794.

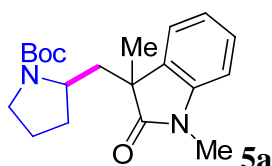

**tert-Butyl-2-((1,3-dimethyl-2-oxoindolin-3-yl)methyl)pyrrolidine-1-carboxylate (5a).** Eluent: PE/EtOAc (5:1). Yield 33.7 mg (65%). Clear oil. <sup>1</sup>H NMR (CDCl<sub>3</sub>, 400 MHz) δ 7.26 (t, *J* = 7.6 Hz, 1H), 7.19 (d, *J* = 7.2 Hz, 1H), 7.05 (dd, *J*<sub>1</sub> = 7.6 Hz, *J*<sub>2</sub> = 7.2 Hz, 1H), 6.83 (d, *J* = 7.6 Hz, 1H), 3.88-3.71 (m, 1H), 3.39-2.98 (m, 5H), 2.61-1.92 (m, 2H), 1.80-1.70 (m, 1H), 1.67-1.53 (m, 2H), 1.45 (s, 9H), 1.40 (s, 3H), 1.22-1.13 (m, 1H). <sup>13</sup>C NMR (CDCl<sub>3</sub>, 100 MHz) δ 179.8, 154.5, 143.1, 134.6, 127.9, 122.8, 122.4, 108.1, 79.6, 54.6, 46.7, 45.6, 42.3, 31.1, 28.6, 26.3, 24.8, 23.0. HRMS (ESI<sup>+</sup>): Calcd for C<sub>20</sub>H<sub>28</sub>N<sub>2</sub>O<sub>3</sub>, [M+H]<sup>+</sup> *m/z* 345.2173. Found 345.2169.

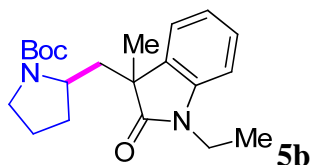

**tert-Butyl-2-((1-ethyl-3-methyl-2-oxoindolin-3-yl)methyl)pyrrolidine-1-carboxylate (5b).**

**te (5b).** Eluent: PE/EtOAc (5:1). Yield 34.0 mg (63%). Clear oil.  $^1\text{H}$  NMR ( $\text{CDCl}_3$ , 400 MHz)  $\delta$  7.23 (dd,  $J_1 = 7.6$  Hz,  $J_2 = 7.2$  Hz, 1H), 7.17 (d,  $J = 7.2$  Hz, 1H), 7.02 (t,  $J = 7.6$  Hz, 1H), 6.82 (d,  $J = 7.6$  Hz, 1H), 3.84-3.67 (m, 3H), 3.35-2.93 (m, 2H), 2.48-1.86 (m, 2H), 1.77-1.68 (m, 1H), 1.62-1.51 (m, 2H), 1.43 (s, 9H), 1.37 (s, 3H), 1.23 (t,  $J = 7.2$  Hz, 3H), 1.15-1.06 (m, 1H).  $^{13}\text{C}$  NMR ( $\text{CDCl}_3$ , 100 MHz)  $\delta$  179.3, 154.4, 142.0, 134.9, 127.8, 123.0, 122.2, 108.2, 79.6, 54.6, 46.6, 45.6, 42.3, 34.6, 30.9, 28.6, 24.8, 23.0, 12.8. HRMS ( $\text{ESI}^+$ ): Calcd for  $\text{C}_{21}\text{H}_{30}\text{N}_2\text{O}_3$ ,  $[\text{M}+\text{H}]^+$   $m/z$  359.2329. Found 359.2324.

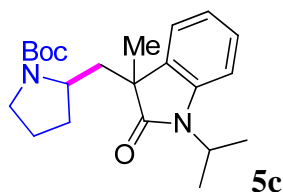

**tert-Butyl-2-((1-isopropyl-3-methyl-2-oxoindolin-3-yl)methyl)pyrrolidine-1-carboxylate (5c).** Eluent: PE/EtOAc (5:1). Yield 32.5 mg (58%). Clear oil.  $^1\text{H}$  NMR ( $\text{CDCl}_3$ , 400 MHz)  $\delta$  7.25-7.17 (m, 2H), 7.05-6.98 (m, 2H), 4.71-4.62 (m, 1H), 3.92-3.71 (m, 1H), 3.35-2.91 (m, 2H), 2.54-2.21 (m, 1H), 1.90-1.66 (m, 2H), 1.64-1.51 (m, 2H), 1.47 (d,  $J = 6.9$  Hz, 6H), 1.46 (s, 9H), 1.38 (s, 3H), 1.13-1.05 (m, 1H).  $^{13}\text{C}$  NMR ( $\text{CDCl}_3$ , 100 MHz)  $\delta$  179.3, 154.4, 141.6, 135.1, 127.5, 123.1, 121.8, 109.8, 79.4, 54.6, 46.3, 45.6, 43.5, 42.5, 30.7, 28.6, 24.9, 23.0, 19.6, 19.4. HRMS ( $\text{ESI}^+$ ): Calcd for  $\text{C}_{22}\text{H}_{32}\text{N}_2\text{O}_3$ ,  $[\text{M}+\text{H}]^+$   $m/z$  373.2486. Found 373.2485.

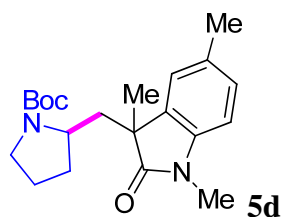

**tert-Butyl-2-((1,3,5-trimethyl-2-oxoindolin-3-yl)methyl)pyrrolidine-1-carboxylate (5d).** Eluent: PE/EtOAc (5:1). Yield 39.9 mg (74%). Clear oil.  $^1\text{H}$  NMR ( $\text{CDCl}_3$ , 400 MHz)  $\delta$  7.06 (d,  $J = 7.2$  Hz, 1H), 7.00 (s, 1H), 6.71 (d,  $J = 7.2$  Hz, 1H), 3.88-3.74 (m, 1H), 3.41-3.23 (m, 1H), 3.22-2.99 (m, 4H), 2.50-2.26 (m, 5H), 1.79-1.69 (m, 1H), 1.68-1.55 (m, 2H), 1.45 (s, 9H), 1.38 (s, 3H), 1.26-1.18 (m, 1H).  $^{13}\text{C}$  NMR ( $\text{CDCl}_3$ , 100 MHz)  $\delta$  179.7, 154.3, 140.7, 134.8, 131.9, 128.1, 123.7, 107.8, 79.5, 54.6, 46.8,

45.7, 42.4, 31.2, 28.6, 26.3, 24.8, 23.3, 21.2. HRMS (ESI<sup>+</sup>): Calcd for C<sub>21</sub>H<sub>30</sub>N<sub>2</sub>O<sub>3</sub>, [M+H]<sup>+</sup> m/z 359.2329. Found 359.2329.

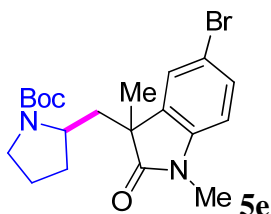

**tert-Butyl-2-((5-bromo-1,3-dimethyl-2-oxoindolin-3-yl)methyl)pyrrolidine-1-carboxylate (5e).** Eluent: PE/EtOAc (5:1). Yield 39.5 mg (62%). Clear oil. <sup>1</sup>H NMR (CDCl<sub>3</sub>, 400 MHz) δ 7.39 (d, *J* = 8.2 Hz, 1H), 7.30 (s, 1H), 6.71 (d, *J* = 8.2 Hz, 1H), 3.84-3.73 (m, 1H), 3.42-3.23 (m, 1H), 3.22-2.99 (m, 4H), 2.49-2.23 (m, 2H), 1.79-1.71 (m, 1H), 1.70-1.56 (m, 2H), 1.44 (s, 9H), 1.39 (s, 3H), 1.26-1.18 (m, 1H). <sup>13</sup>C NMR (CDCl<sub>3</sub>, 100 MHz) δ 179.3, 154.4, 142.2, 136.7, 130.7, 126.2, 115.1, 109.5, 79.7, 54.4, 47.0, 45.7, 42.3, 31.5, 28.6, 26.4, 24.8, 23.3. HRMS (ESI<sup>+</sup>): Calcd for C<sub>20</sub>H<sub>27</sub>N<sub>2</sub>O<sub>3</sub>Br, [M+H]<sup>+</sup> m/z 425.1260. Found 425.1262.

## References

1. Kachkovskiy, G., Faderl, C. & Reiser, O. *Adv. Synth. Catal.* **355**, 2240-2248 (2013).
2. Wang, Q., Dong, X., Xiao, T. & Zhou, L. *Org. Lett.* **15**, 4846-4849 (2013).

The  $^1\text{H}$  and  $^{13}\text{C}$  NMR spectra of compounds **3a-f** and **5a-e**

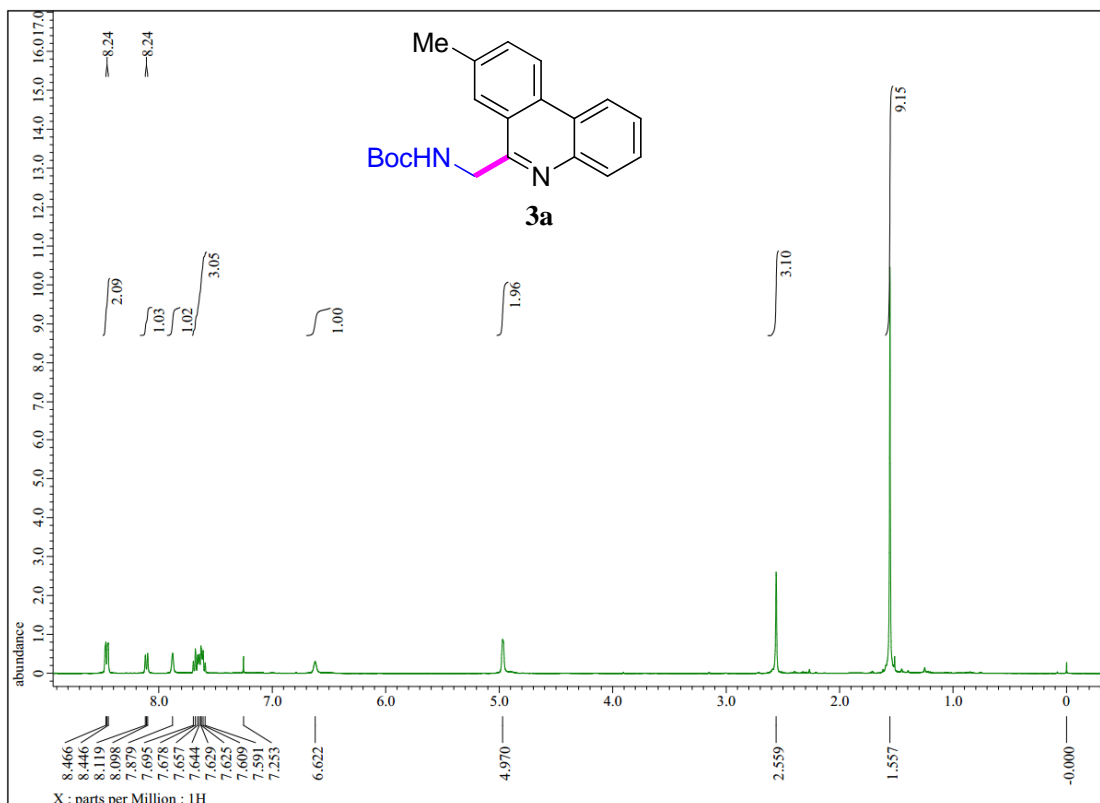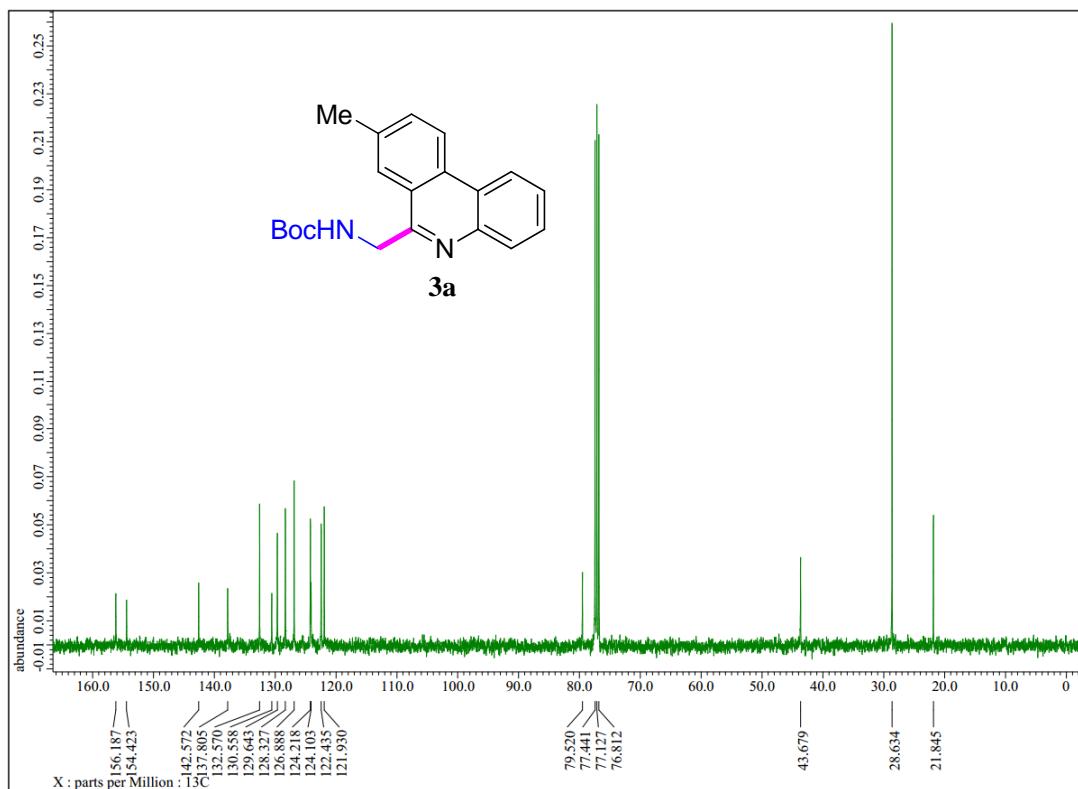

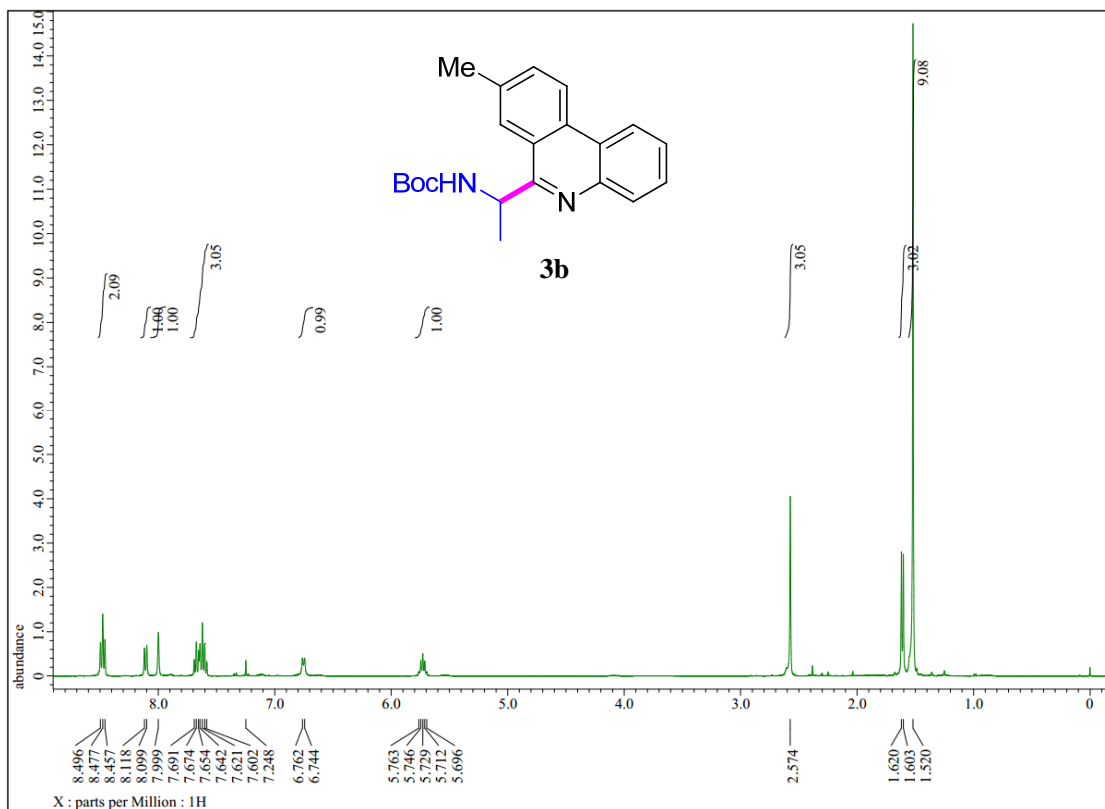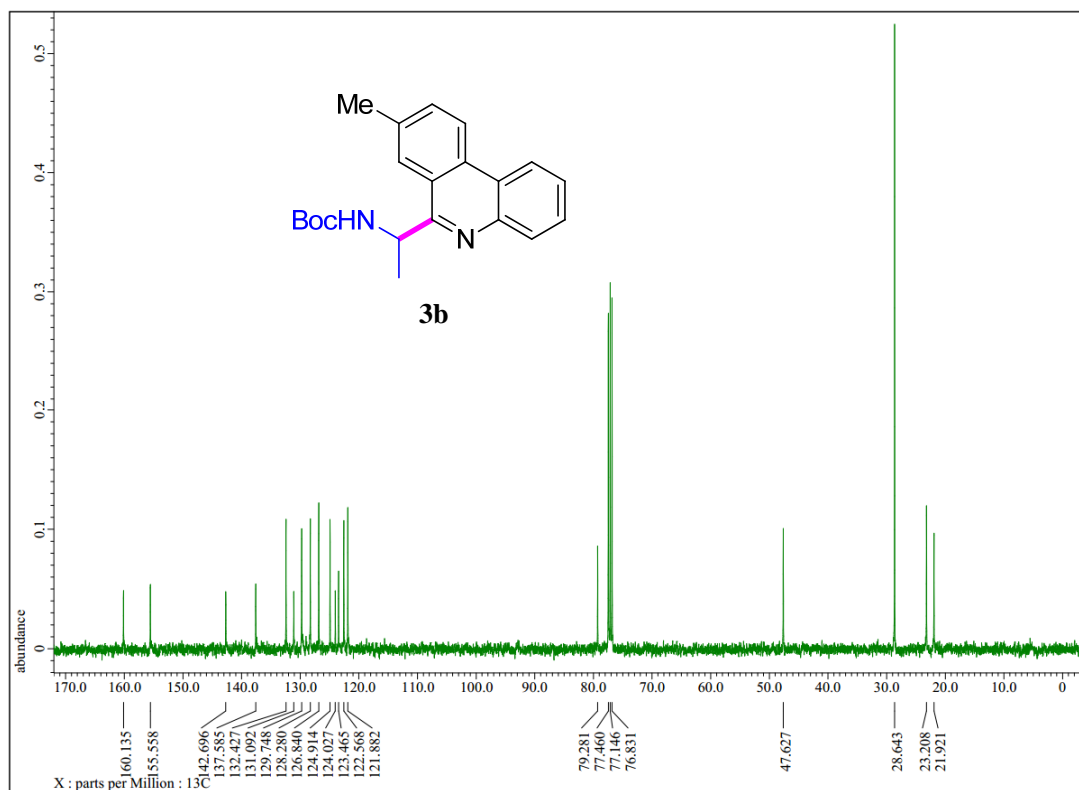

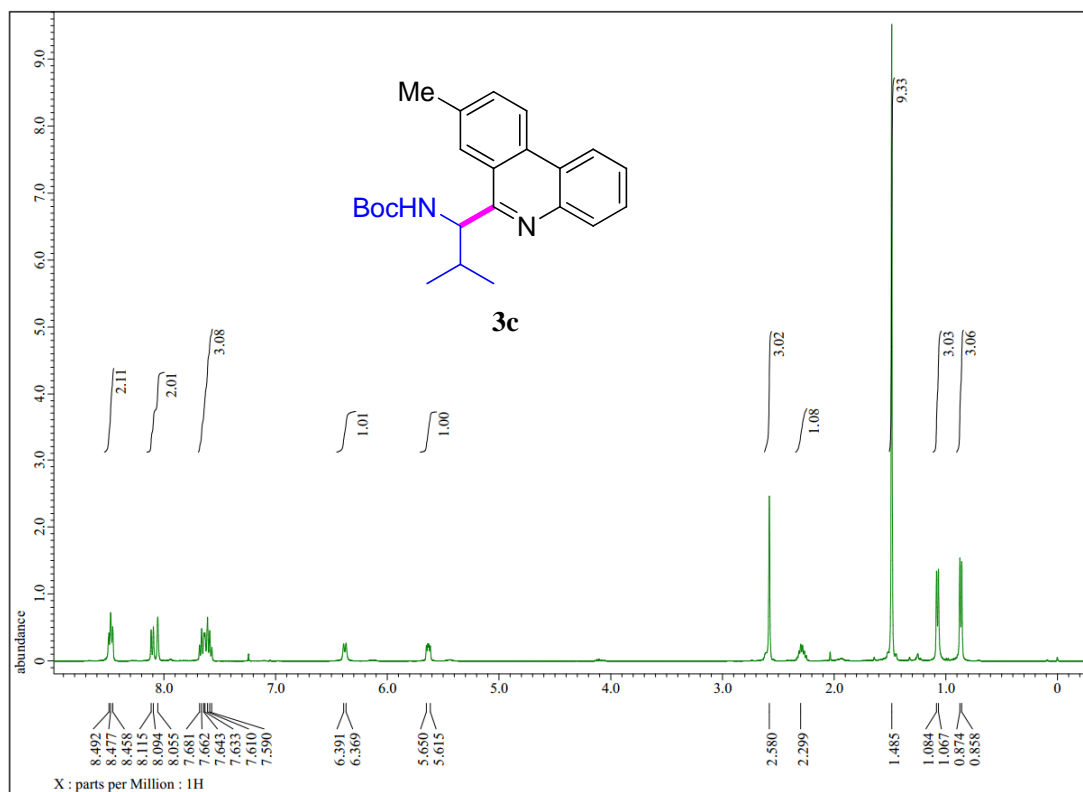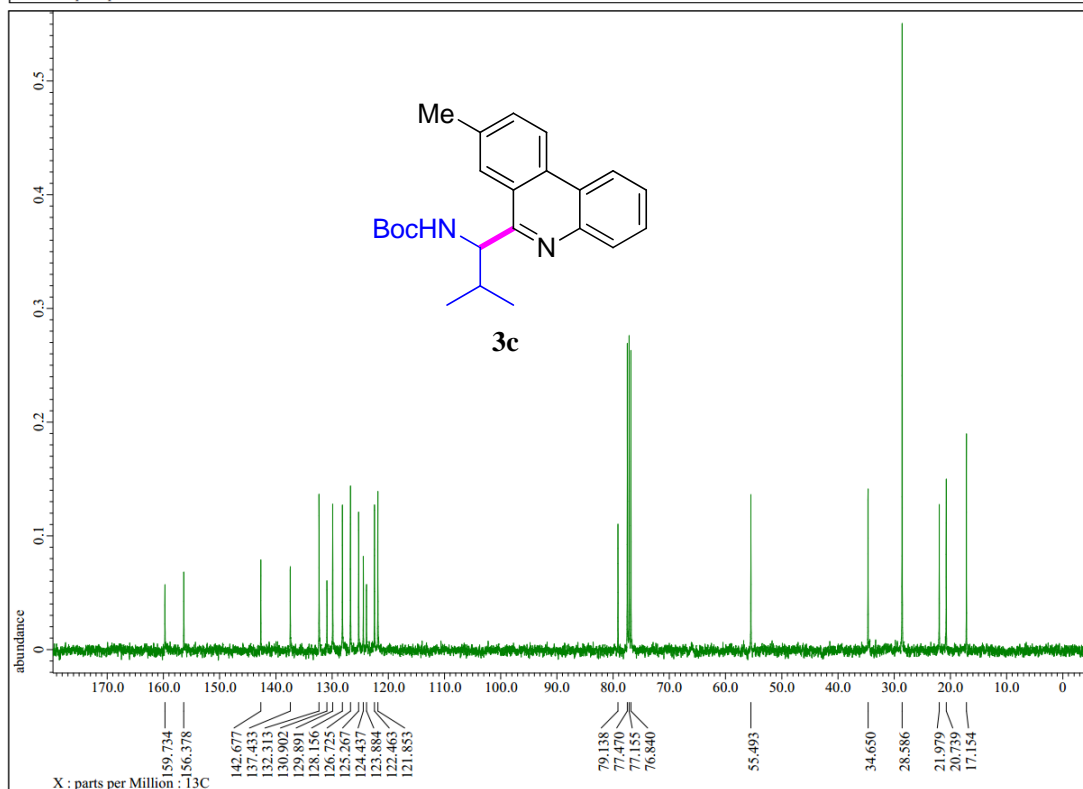



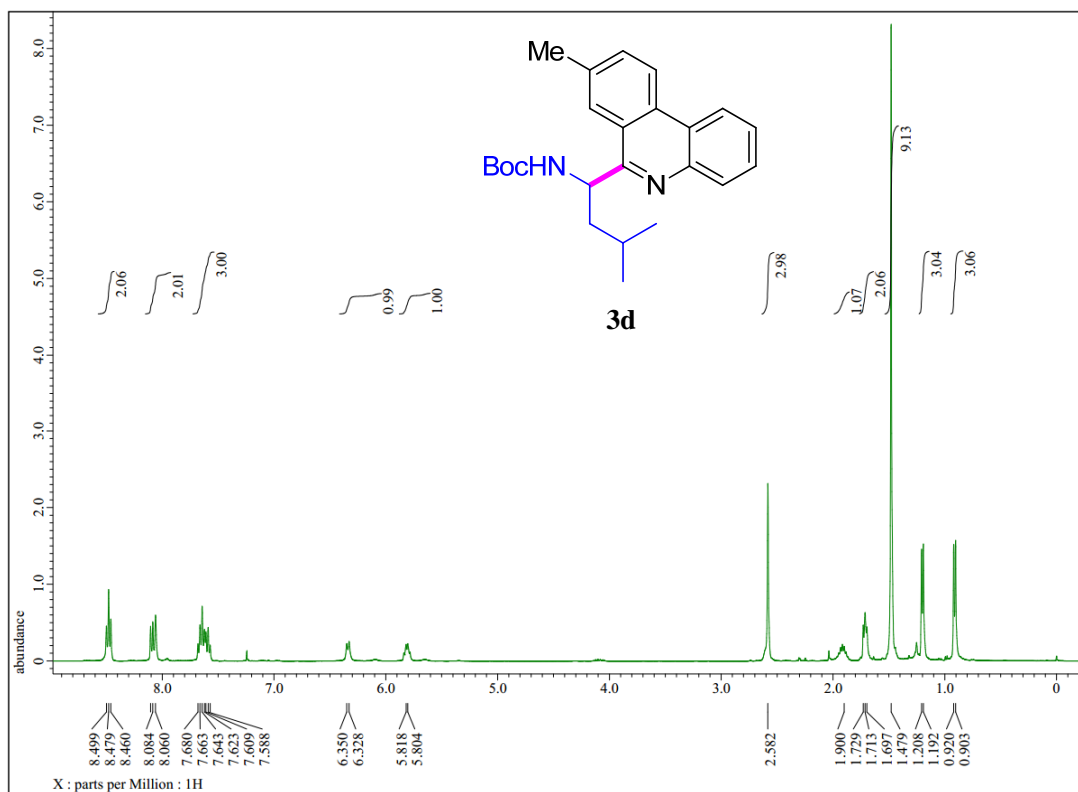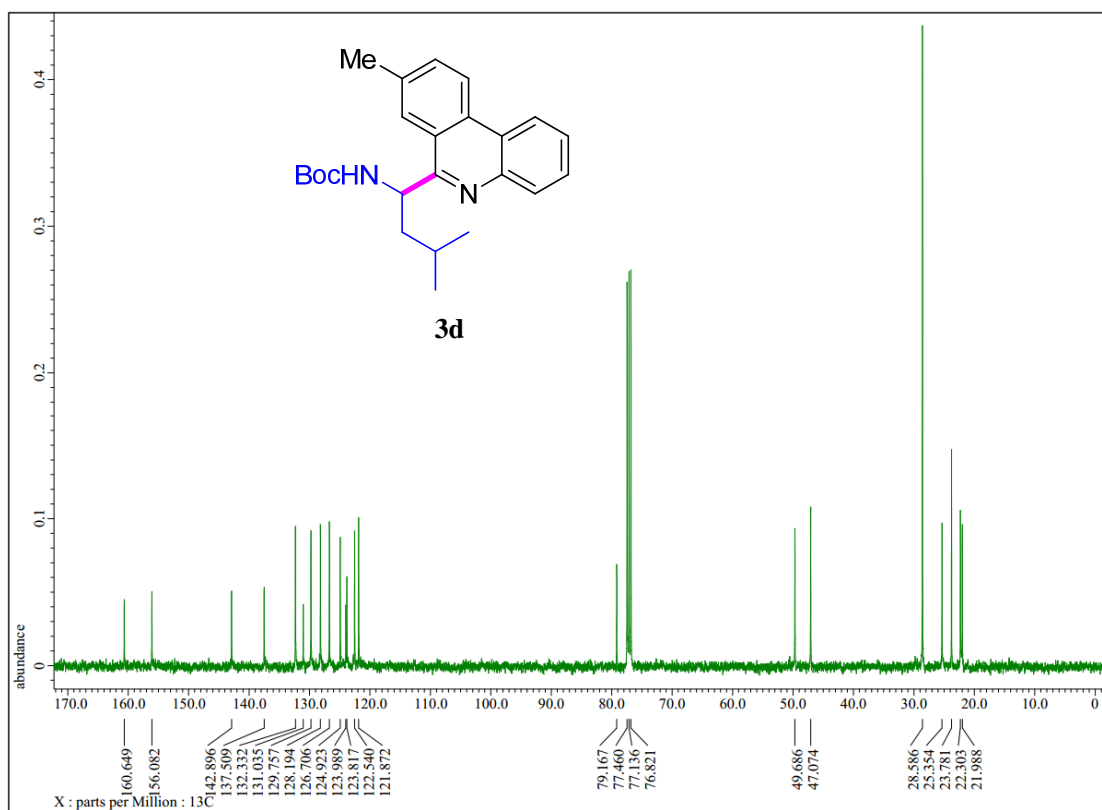

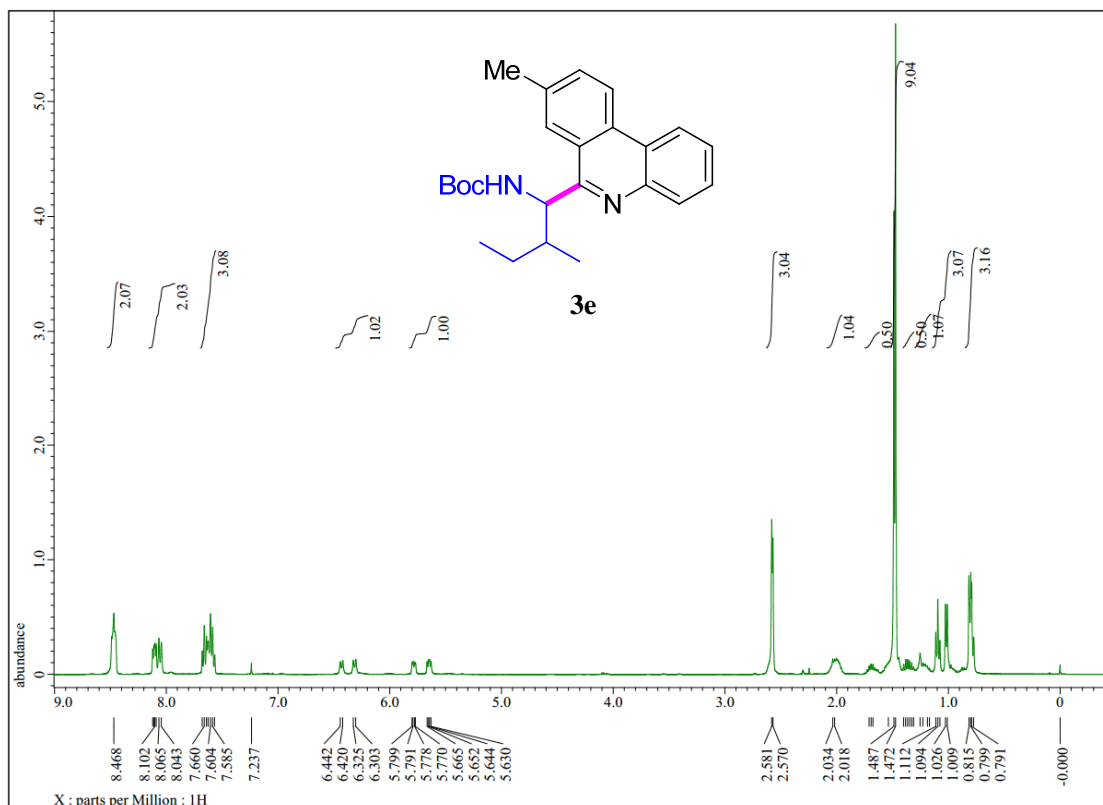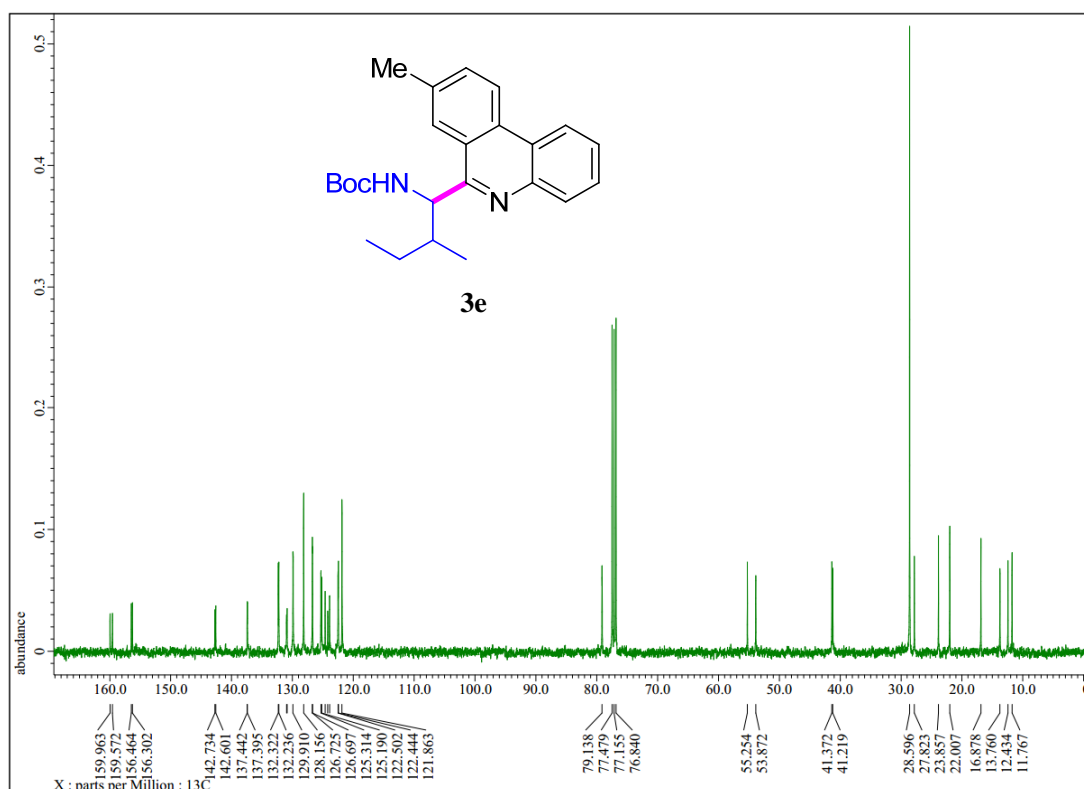

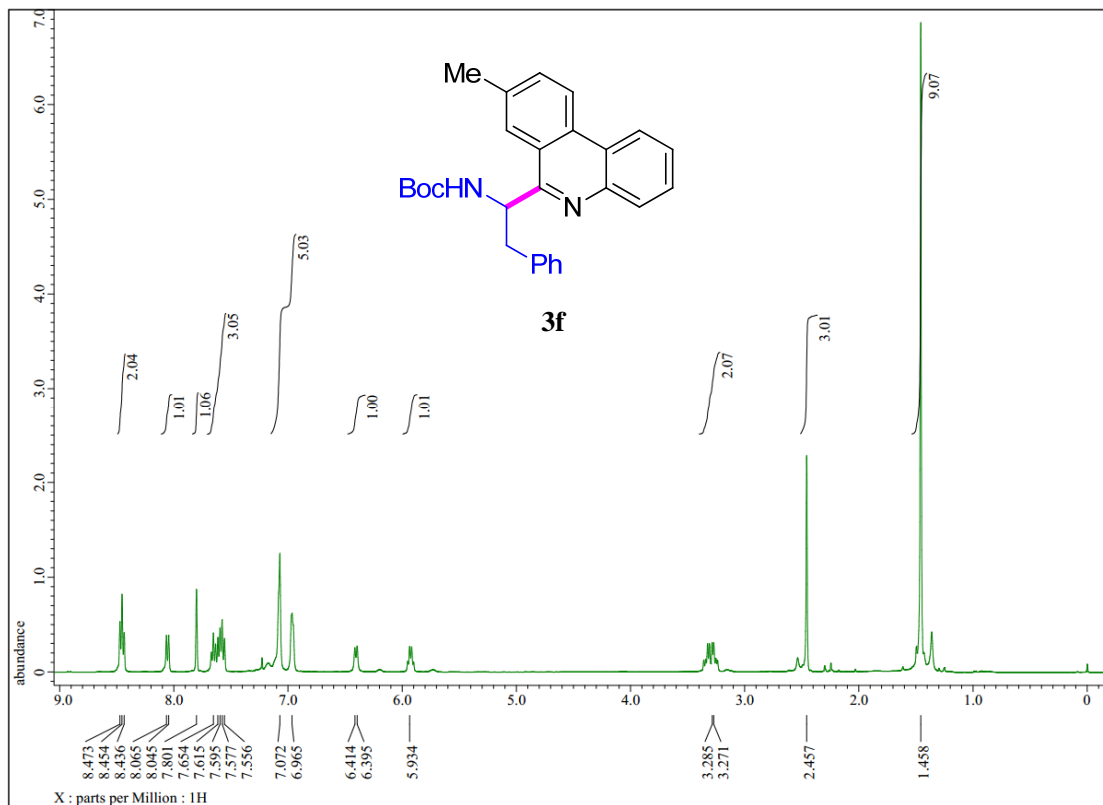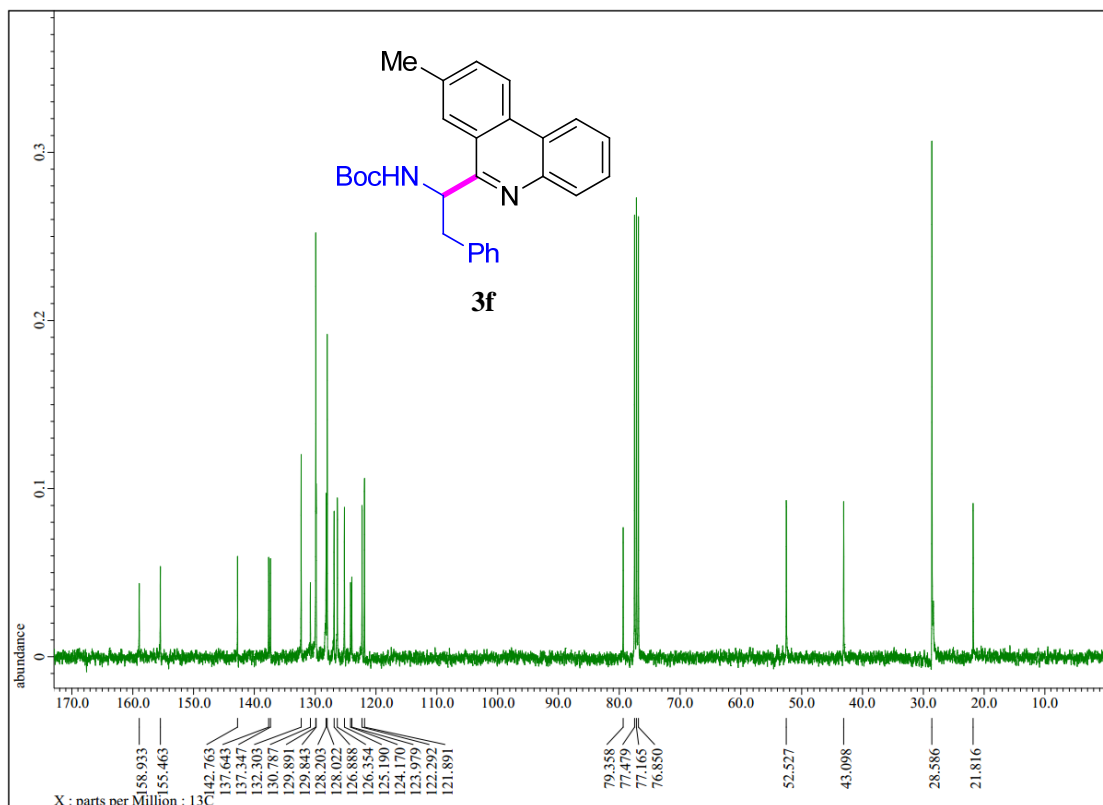

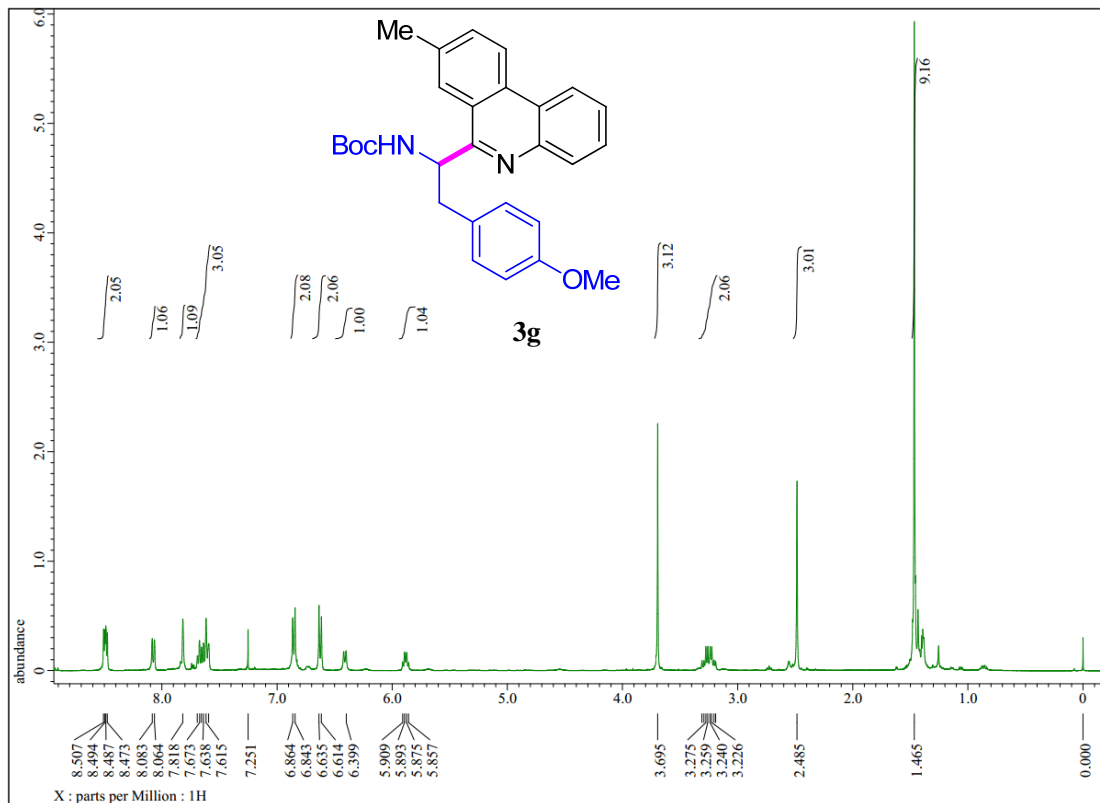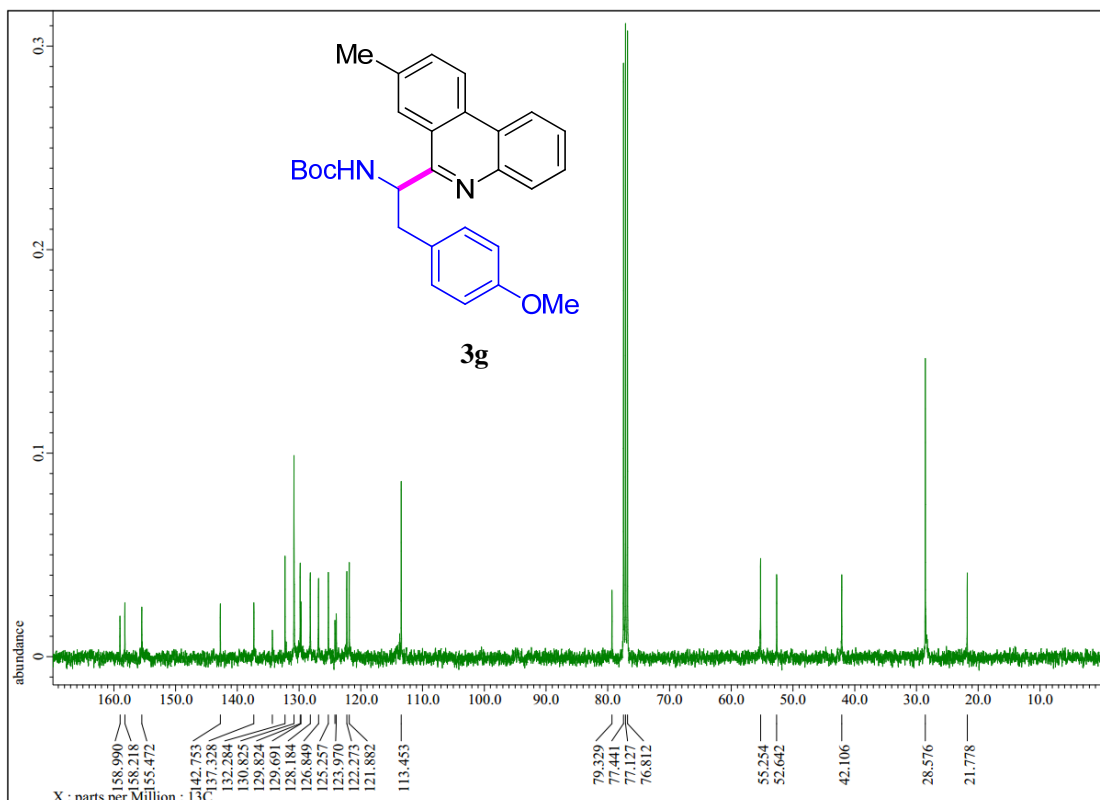

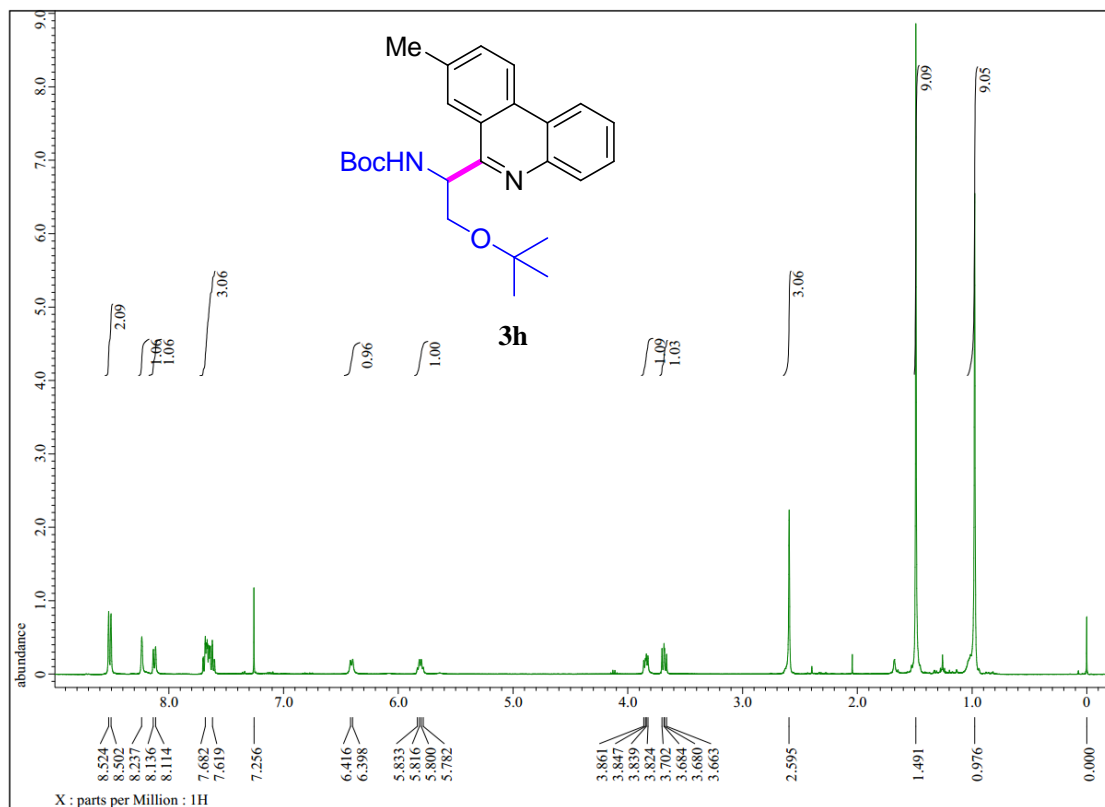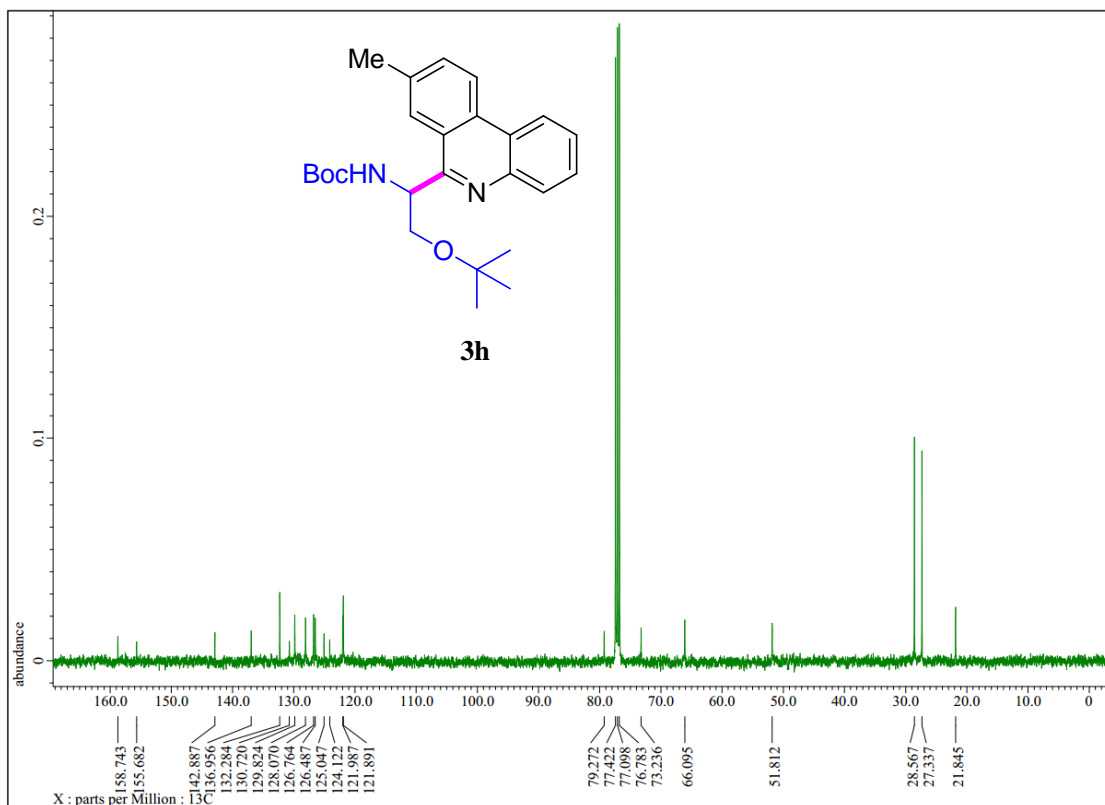

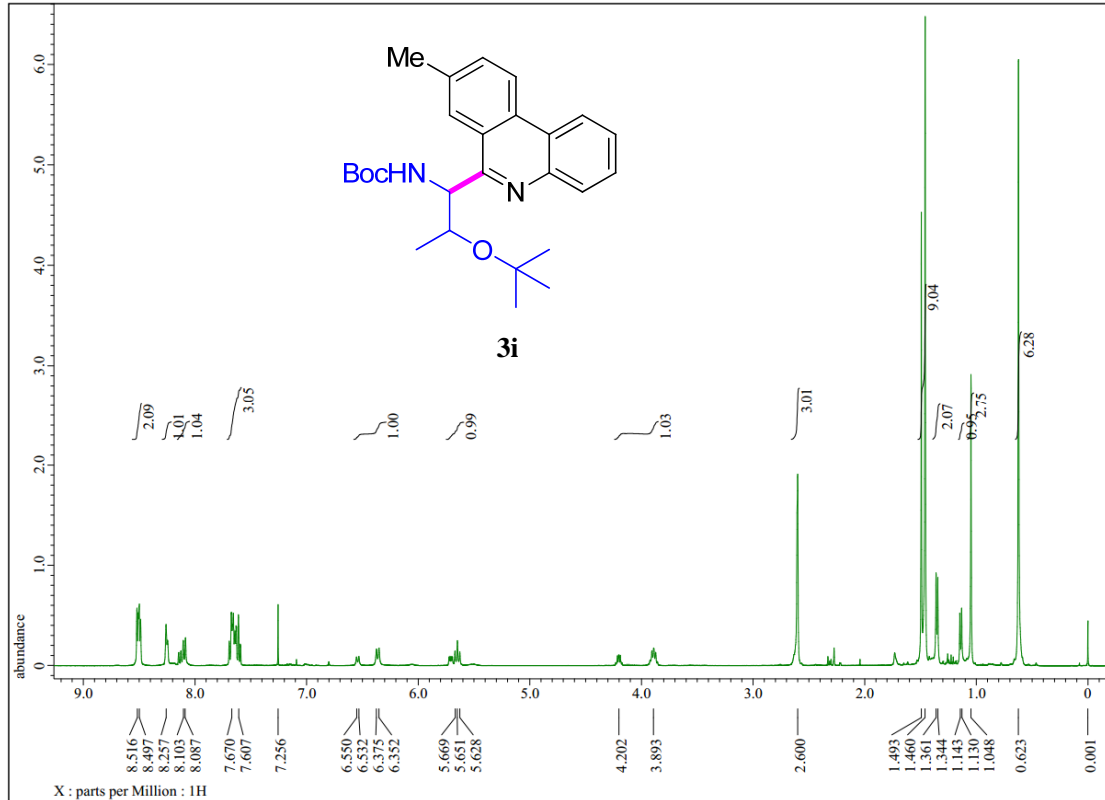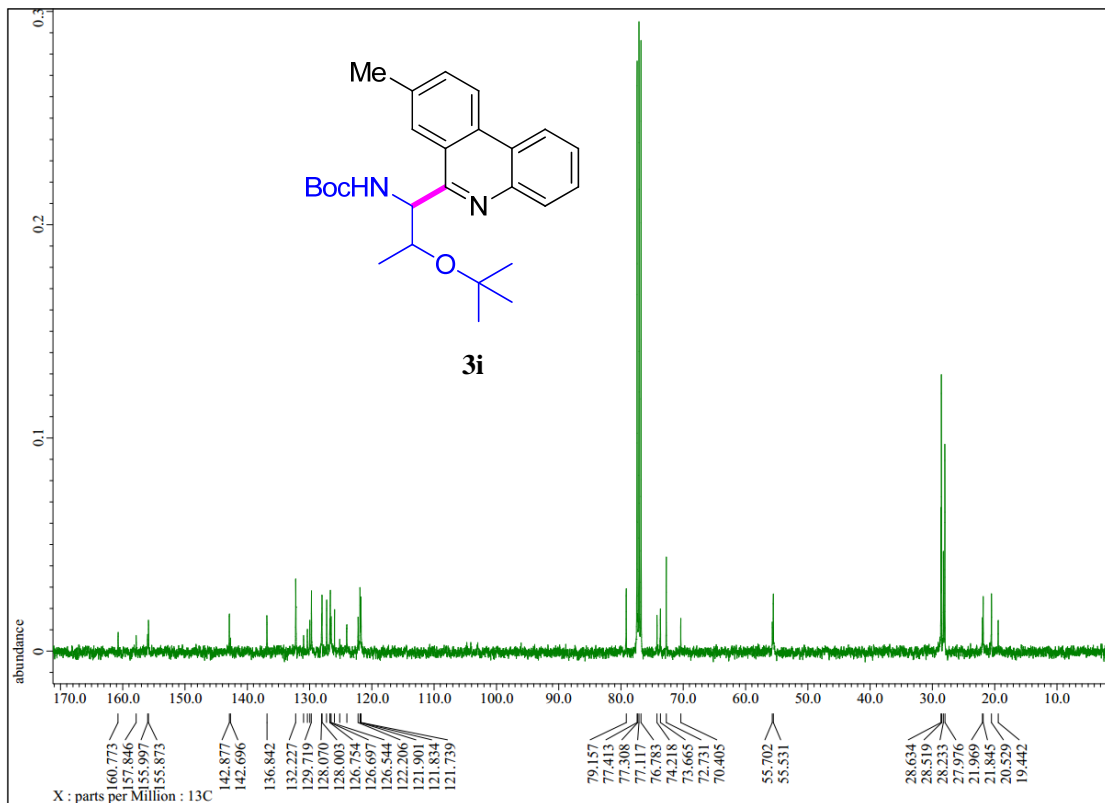

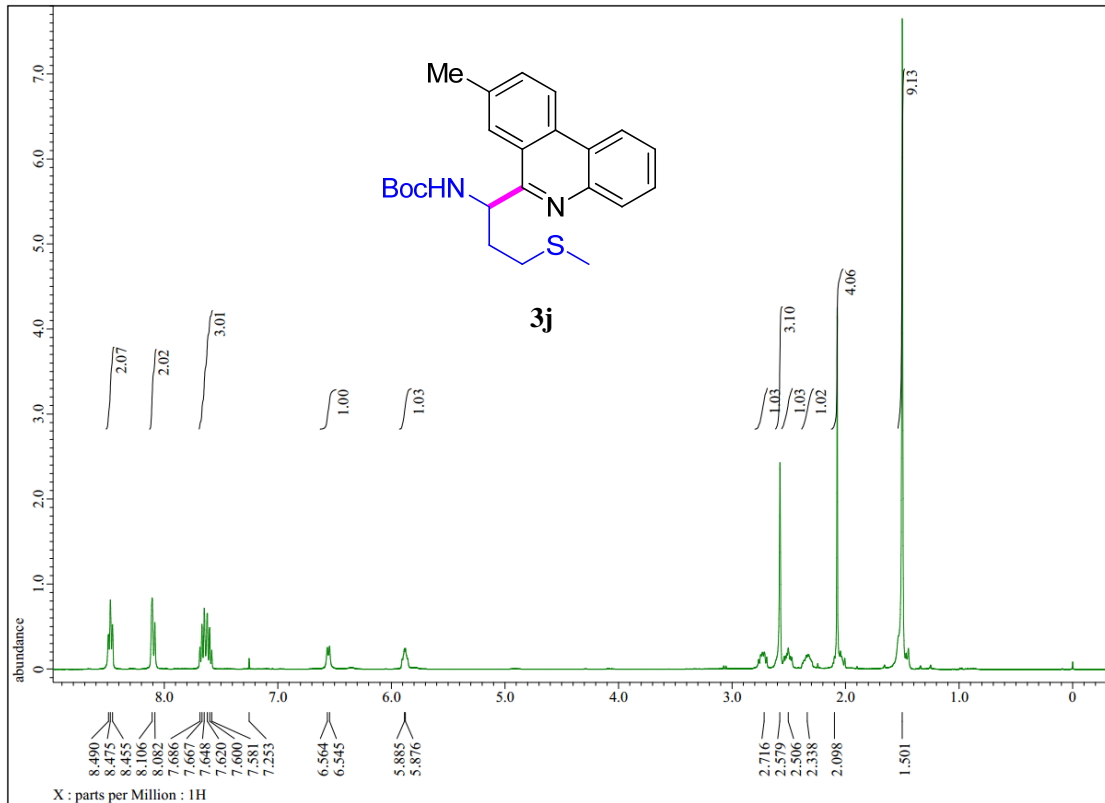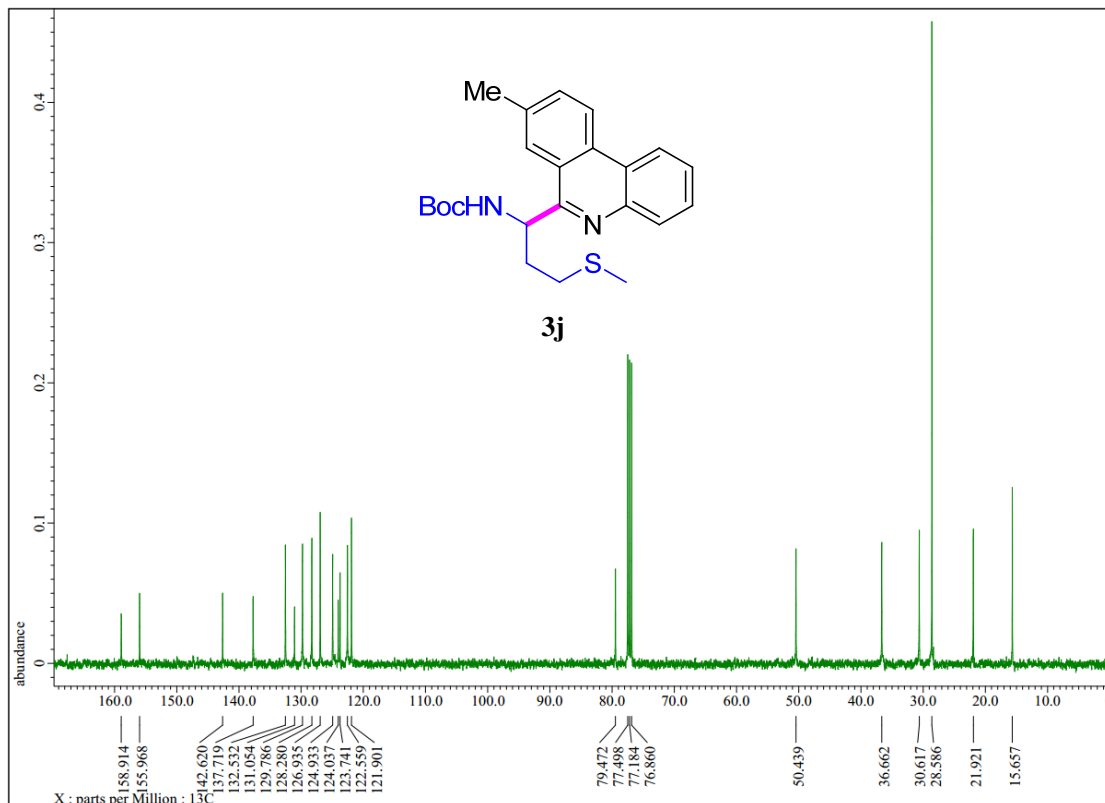

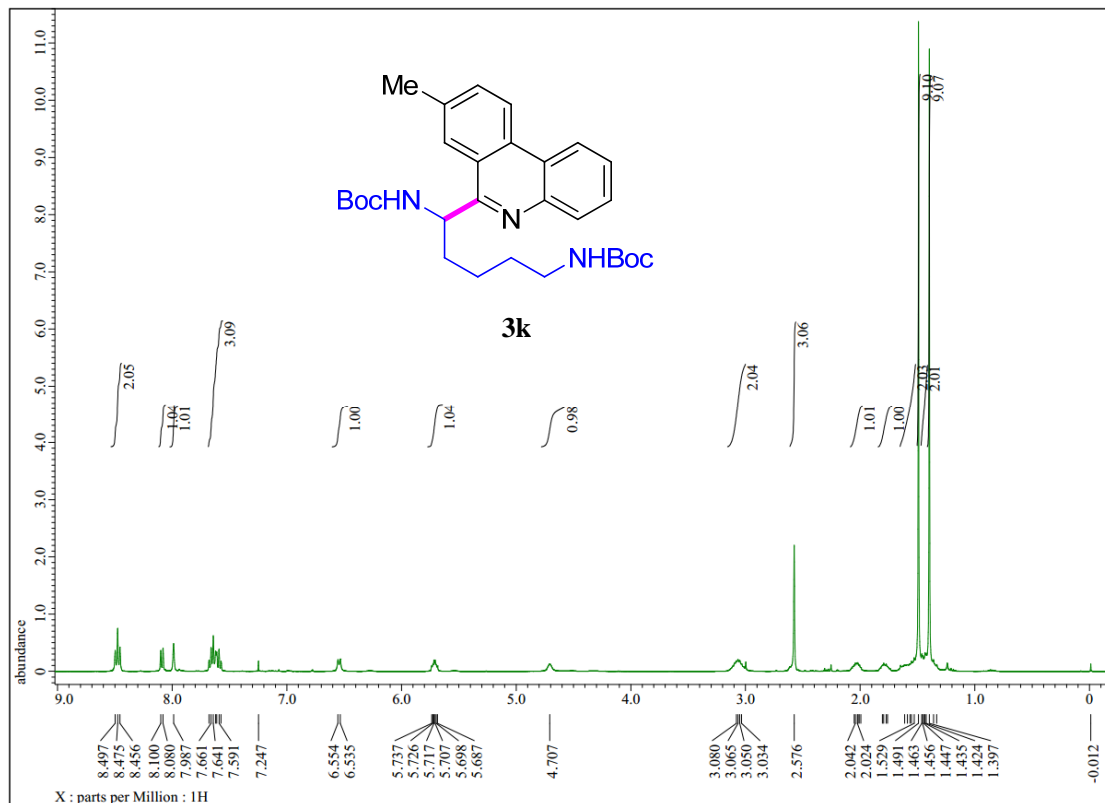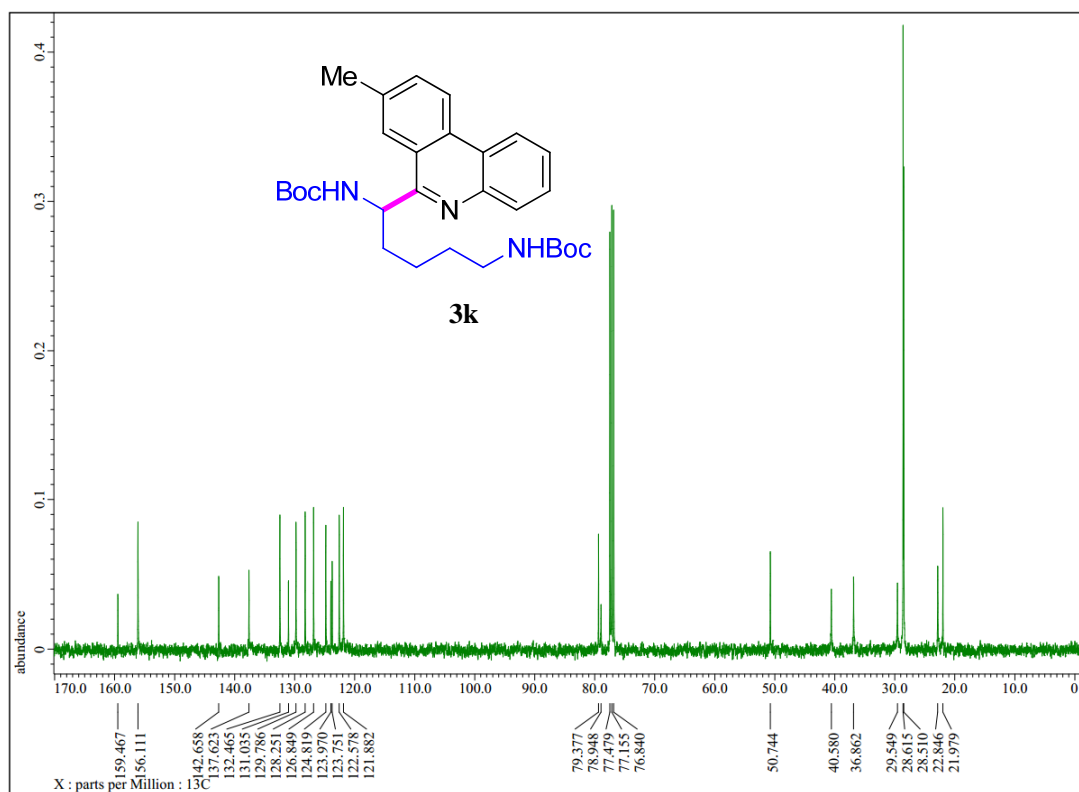



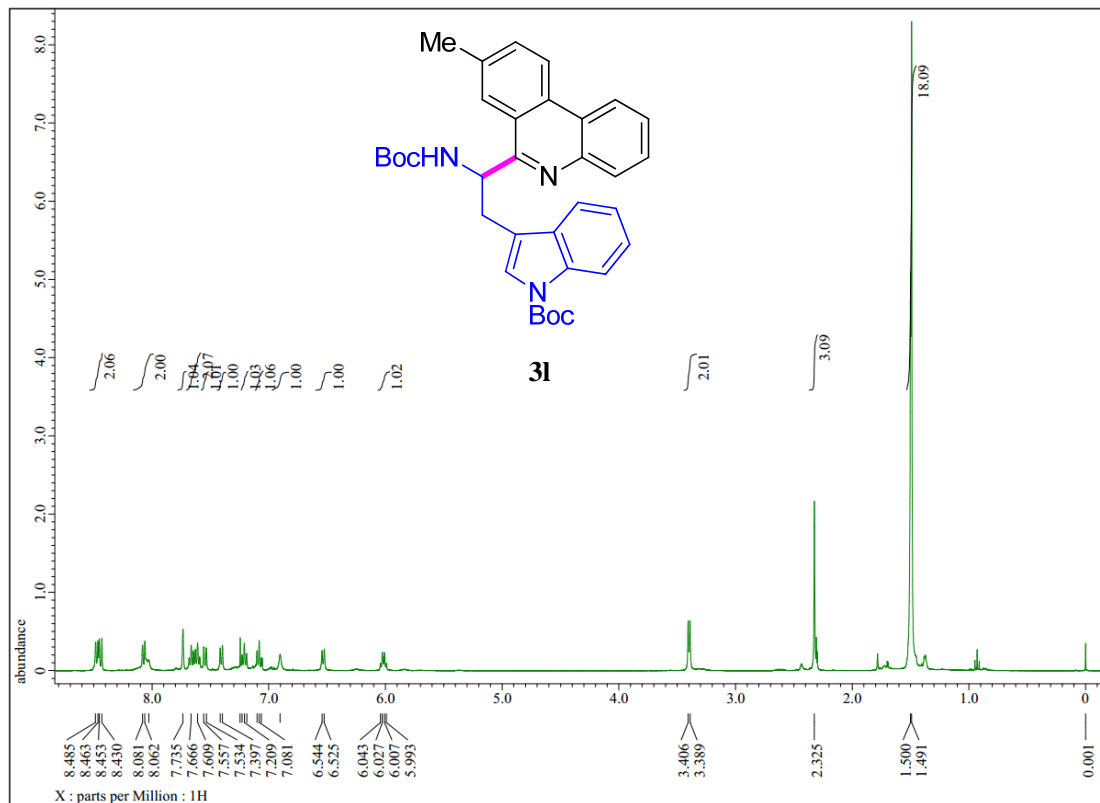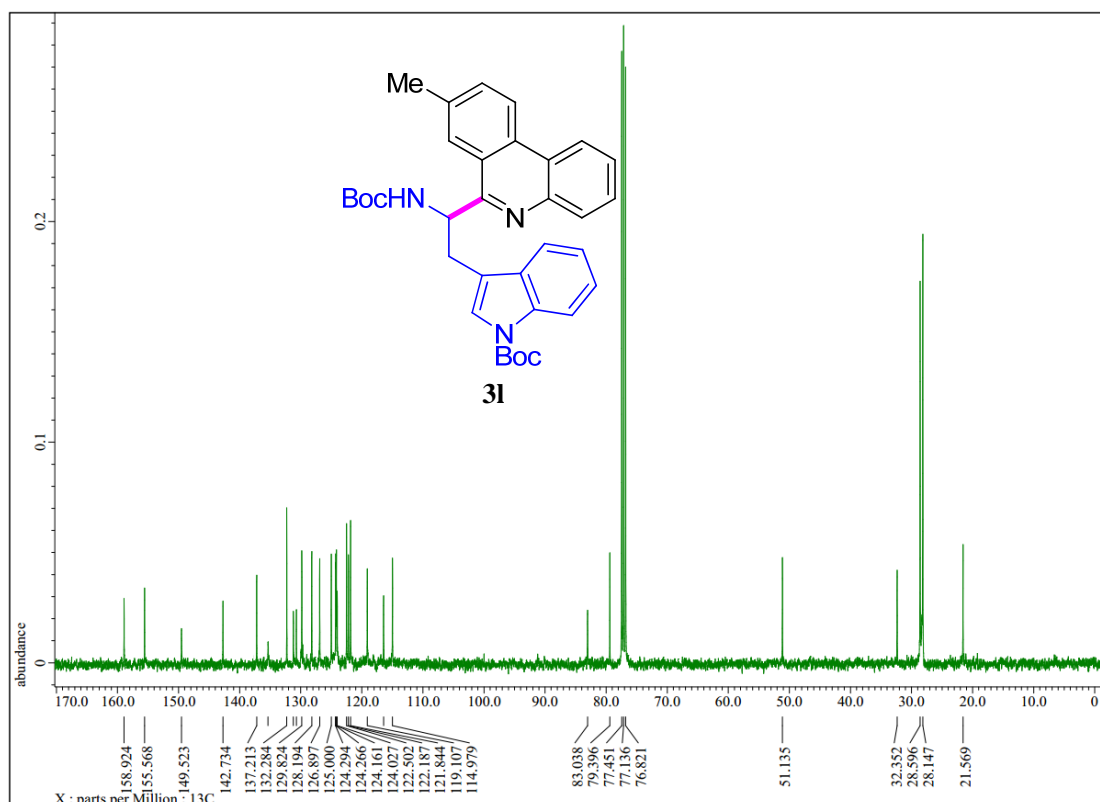

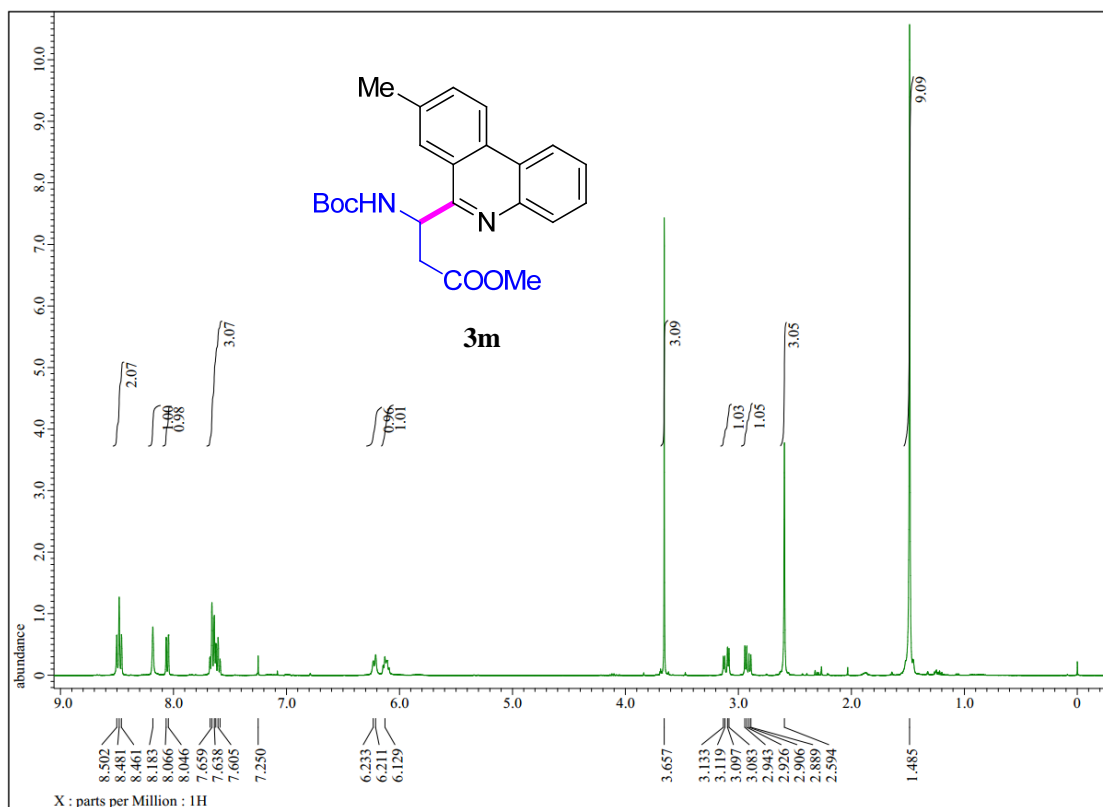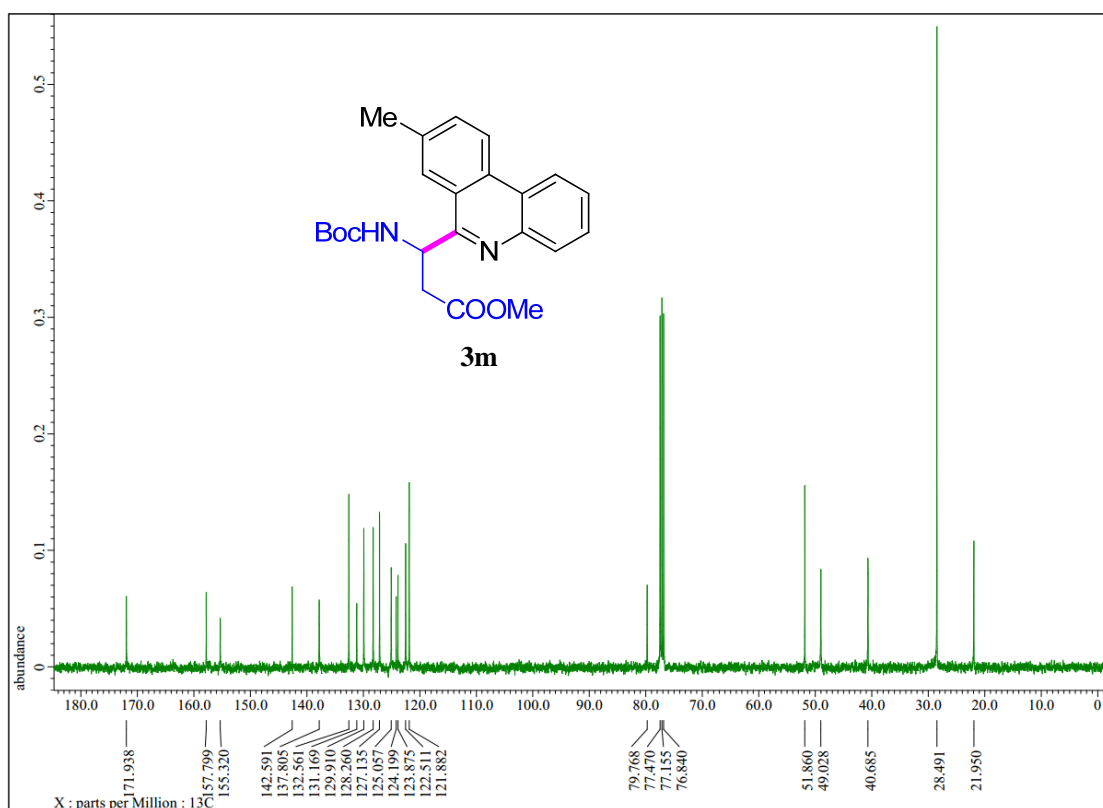

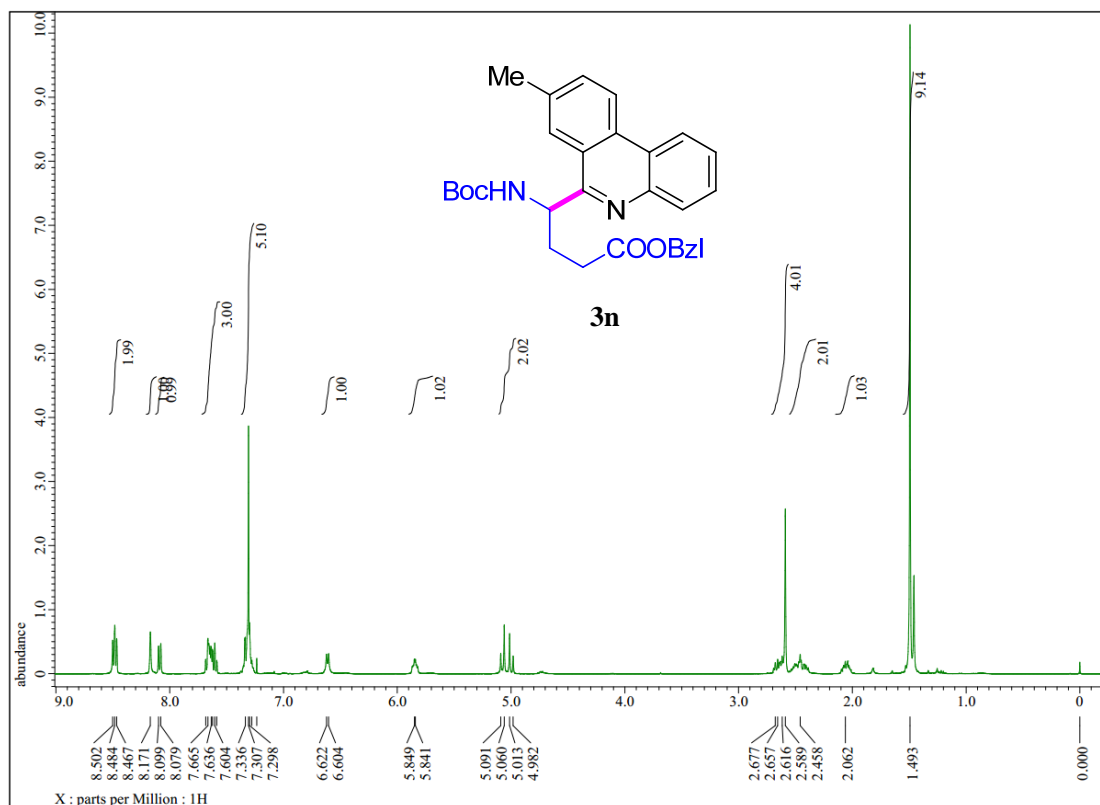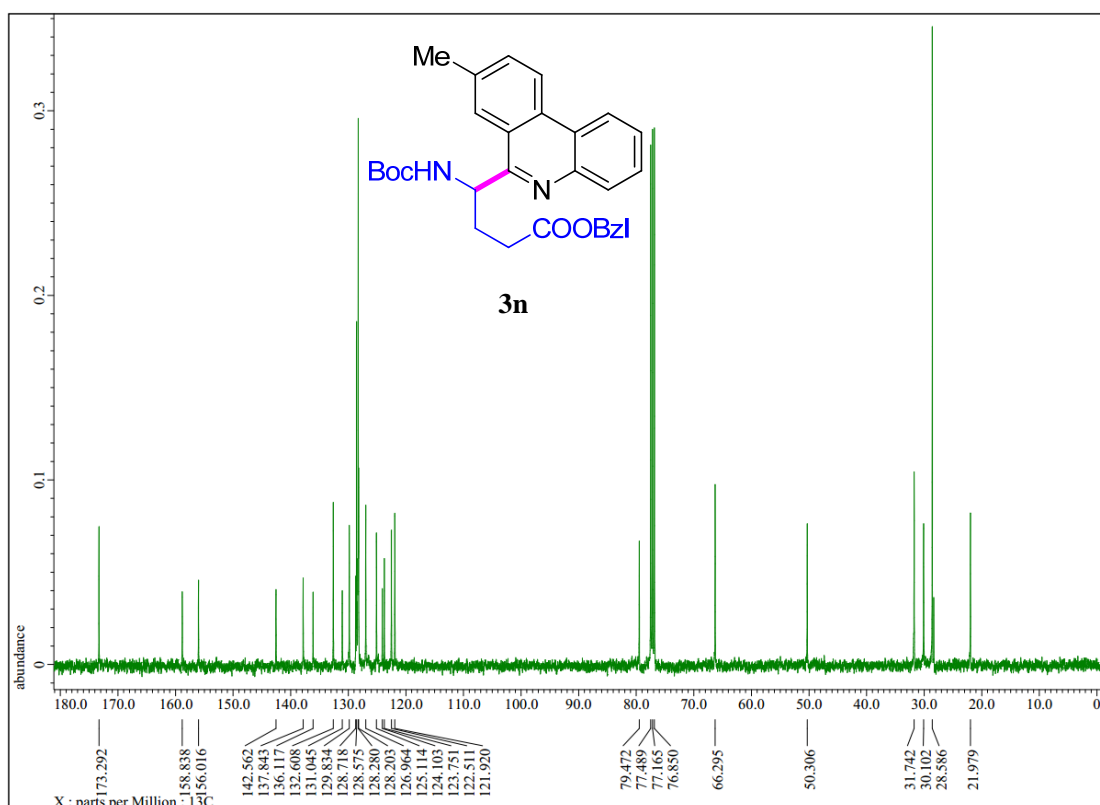

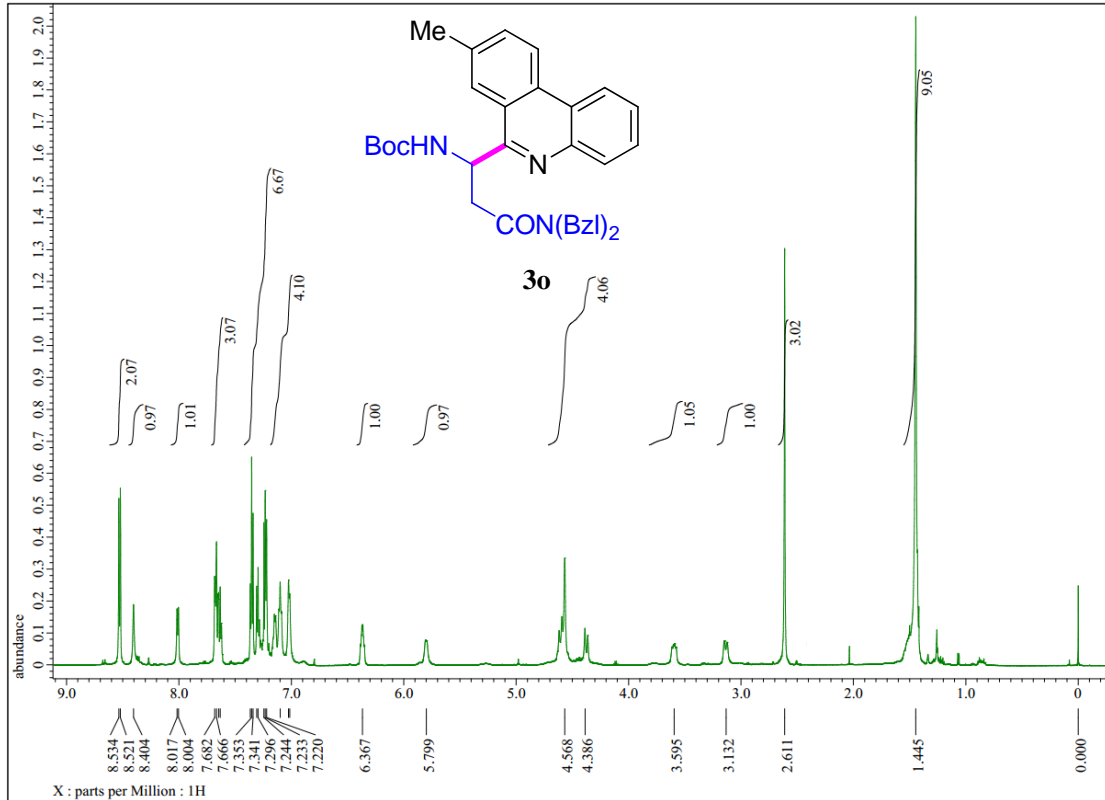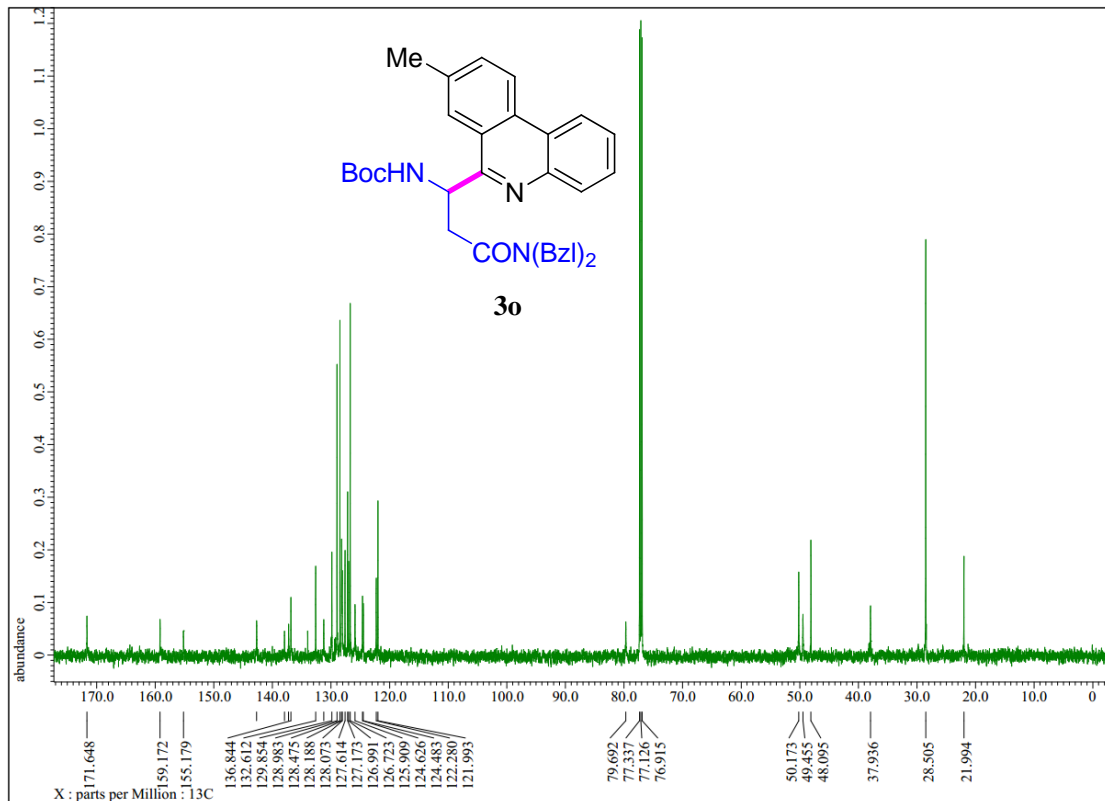

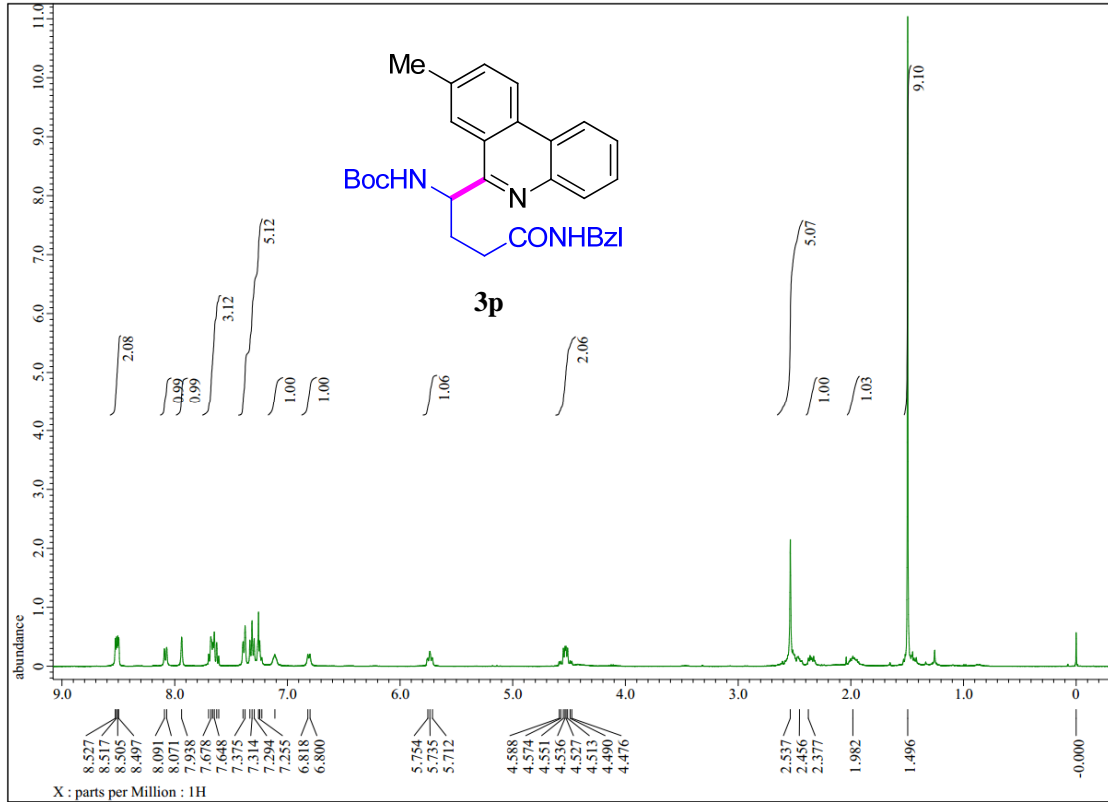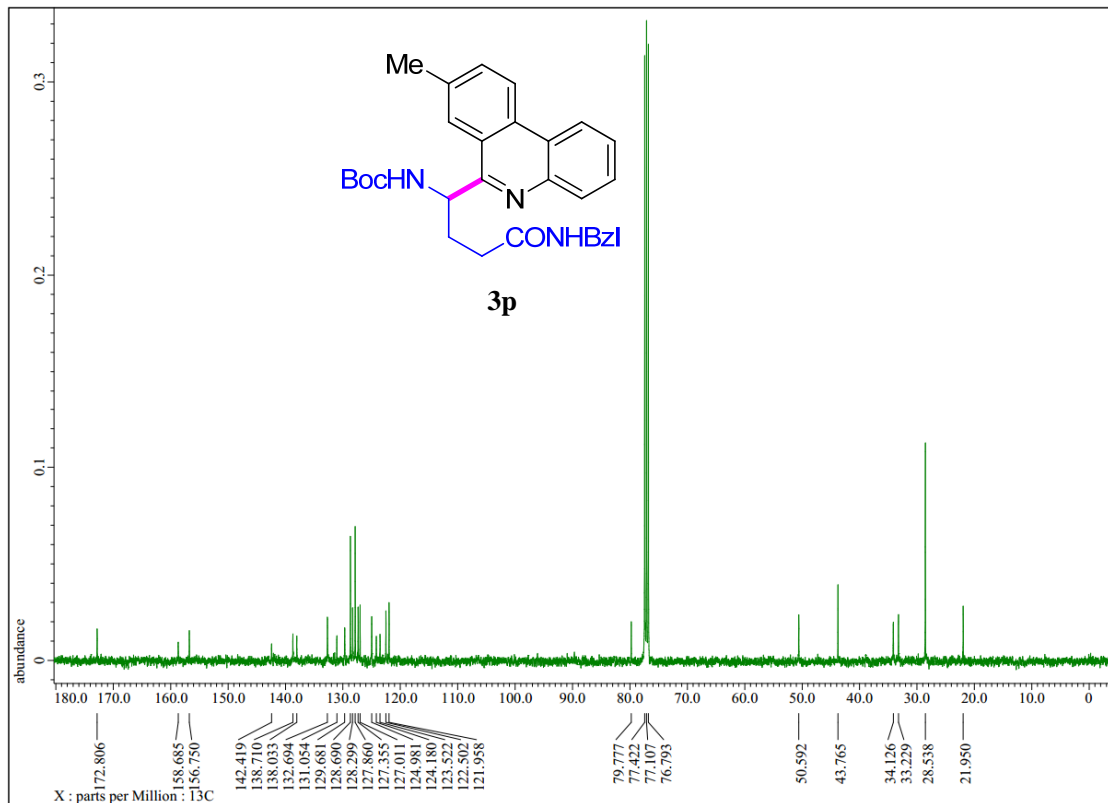

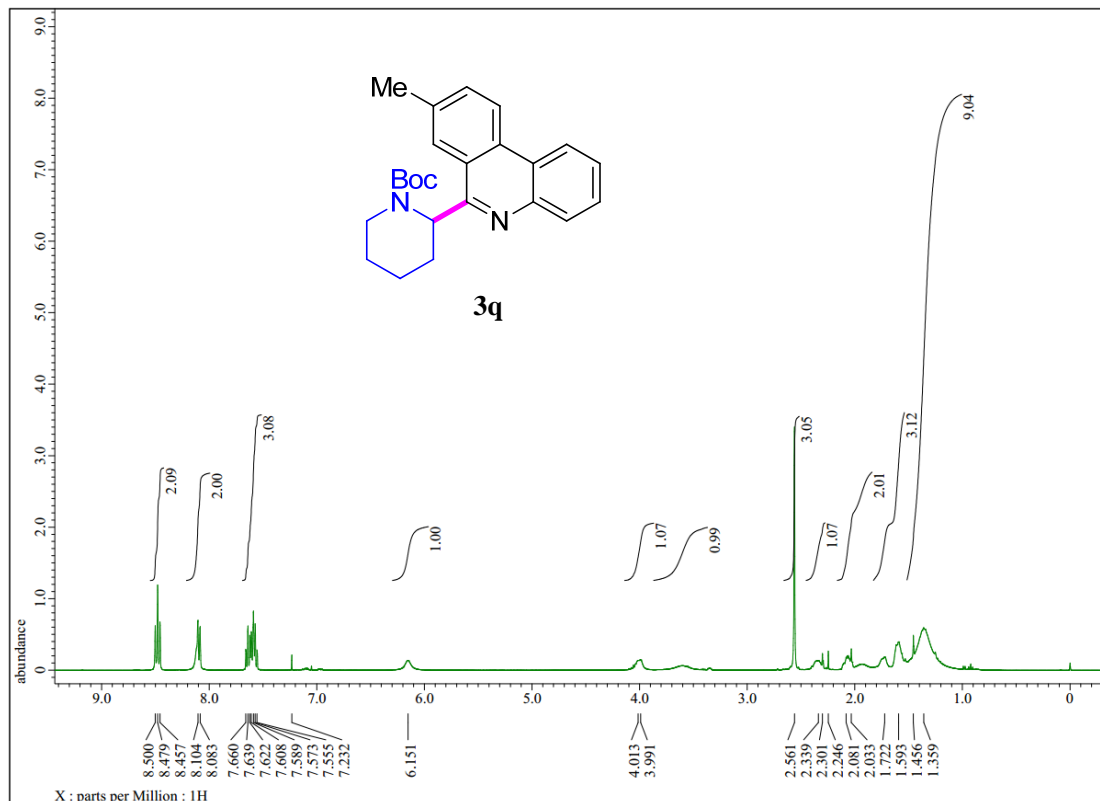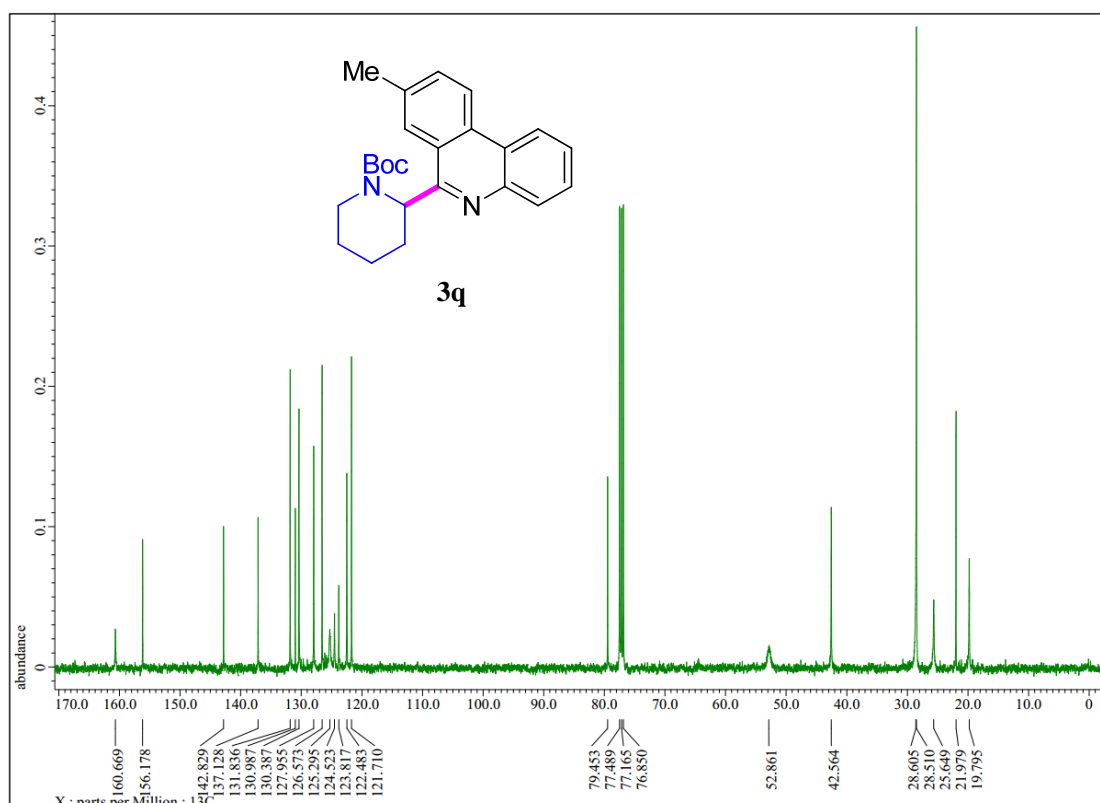

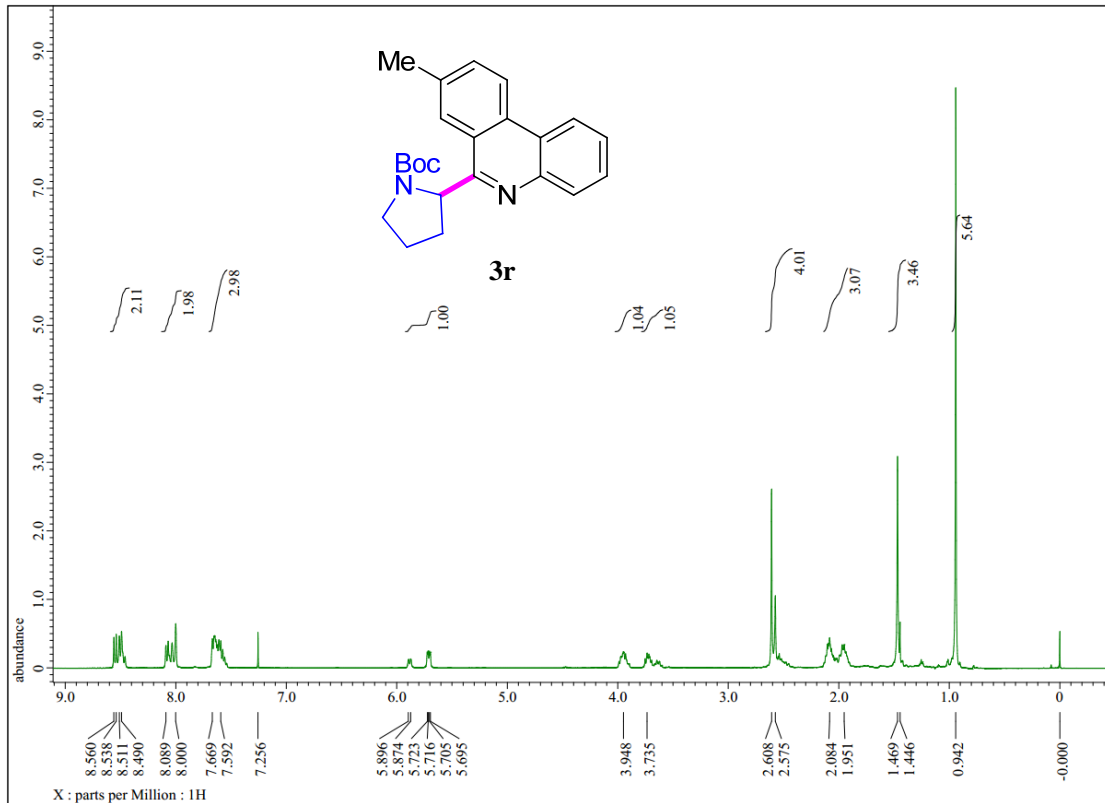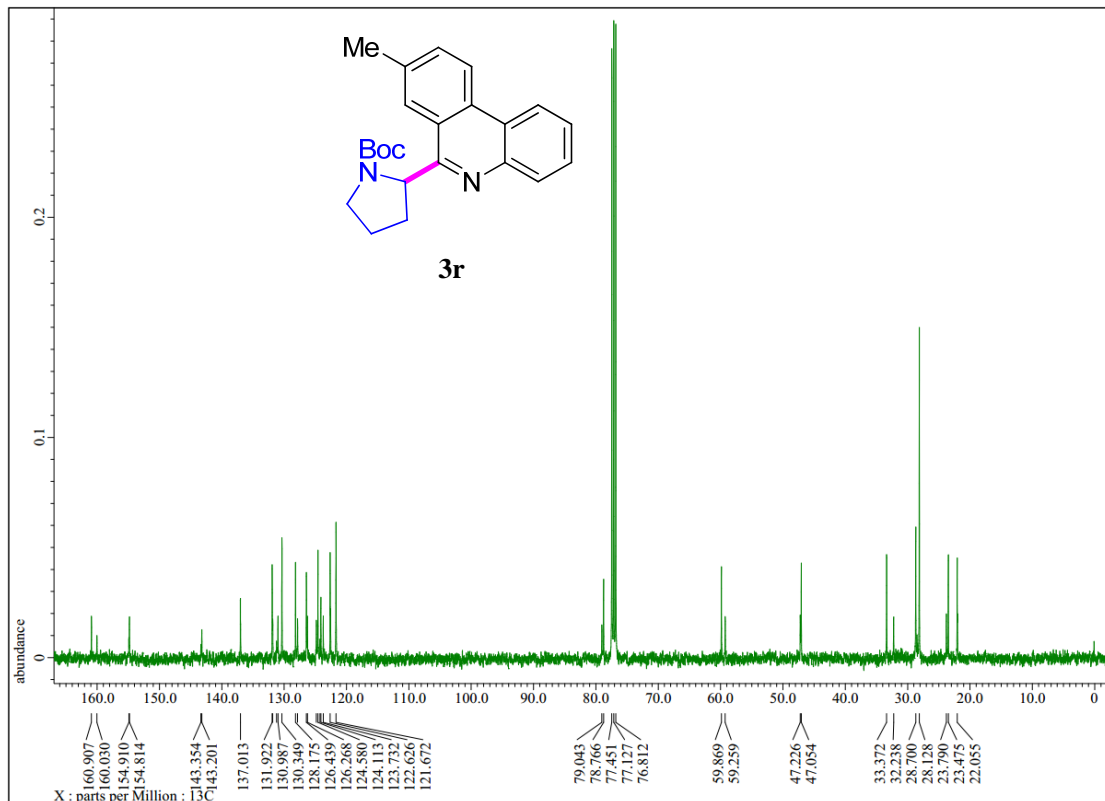

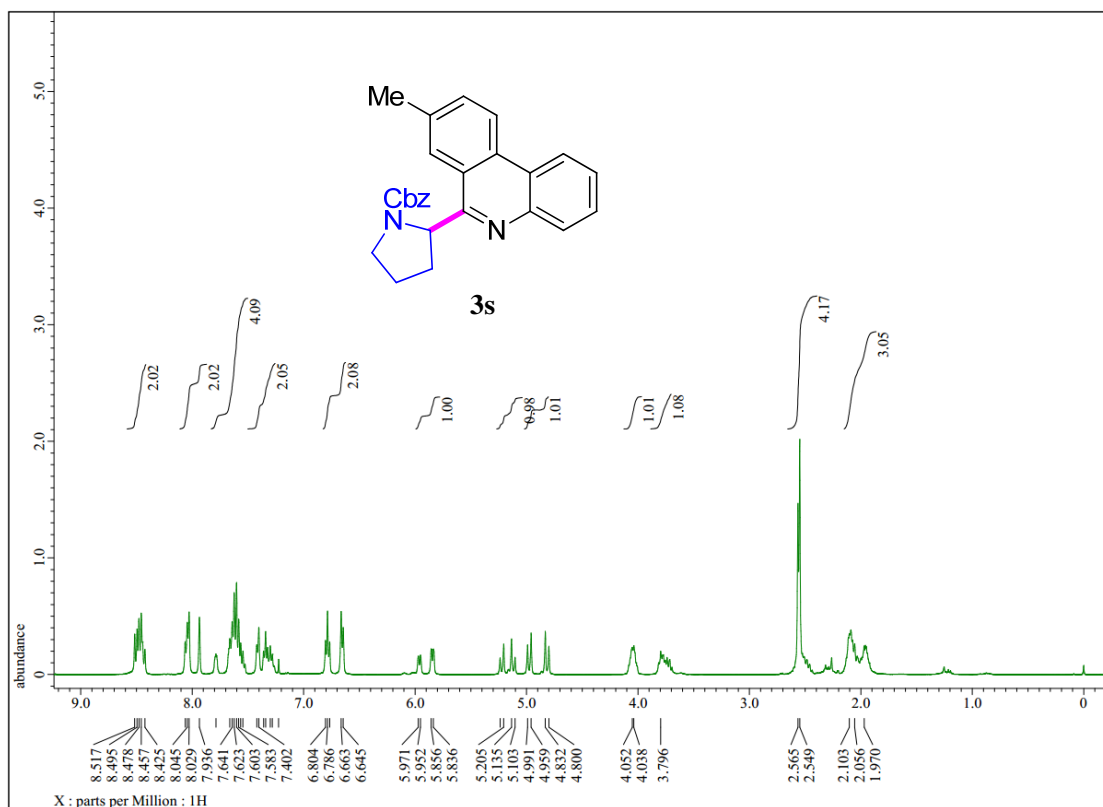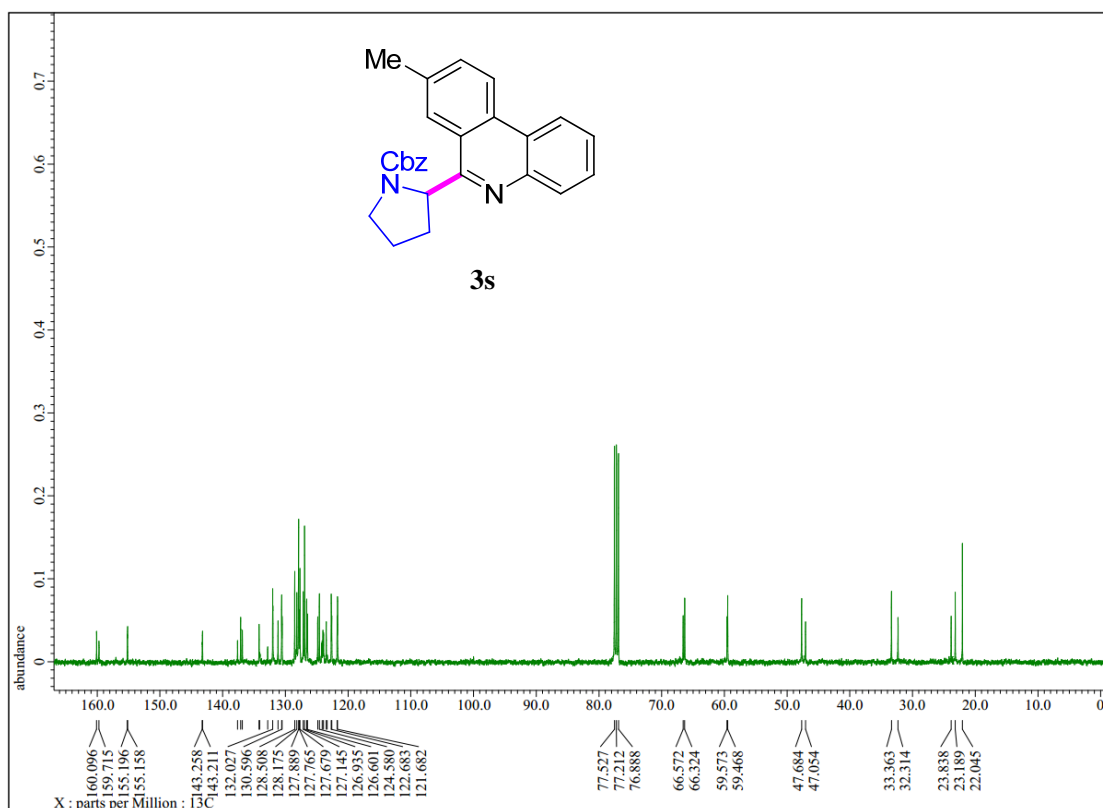



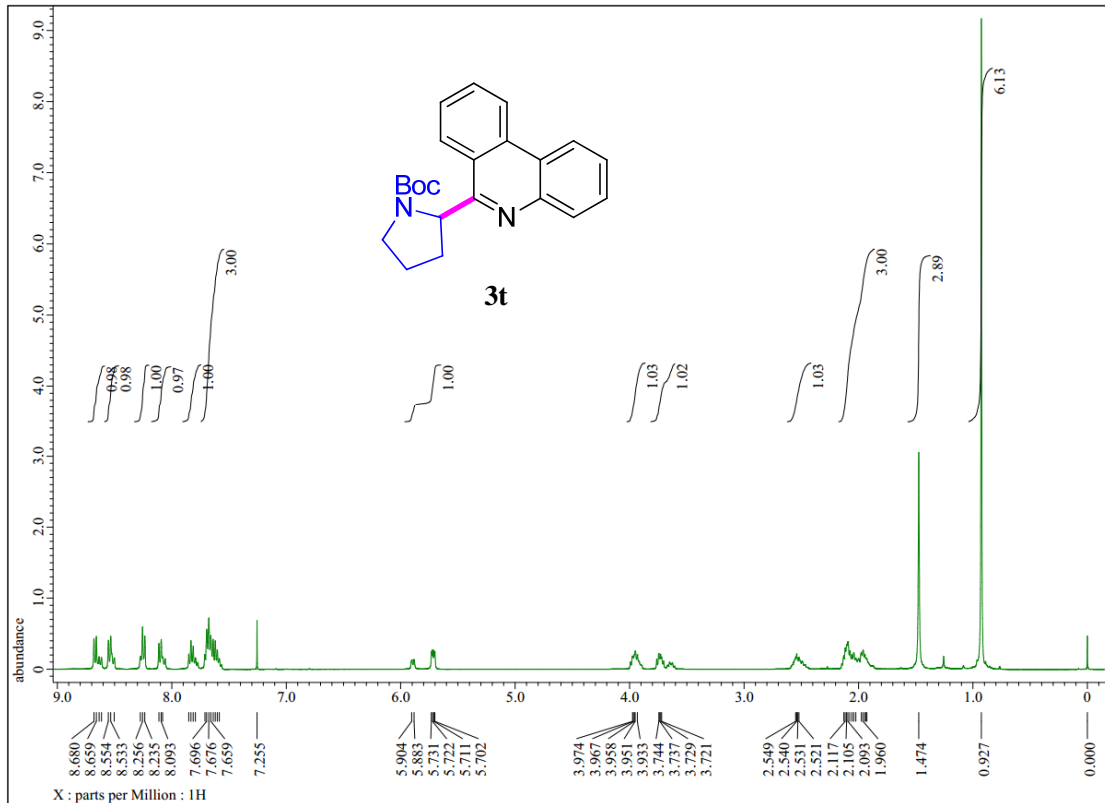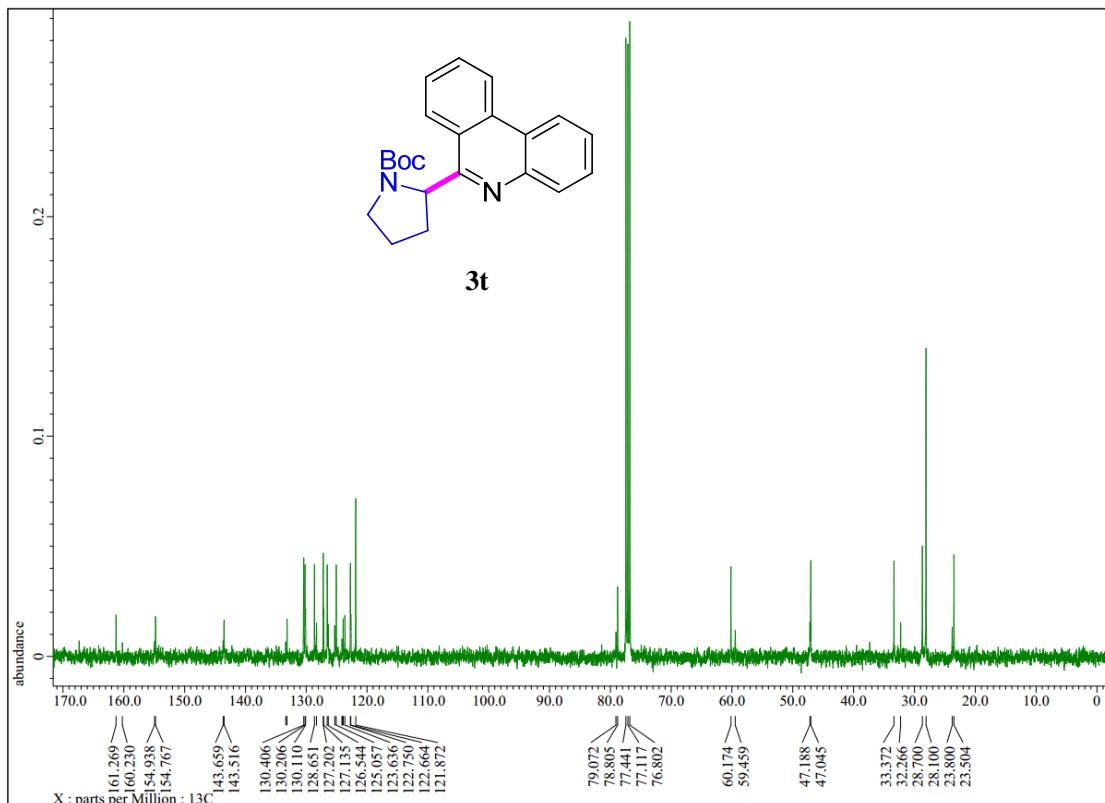

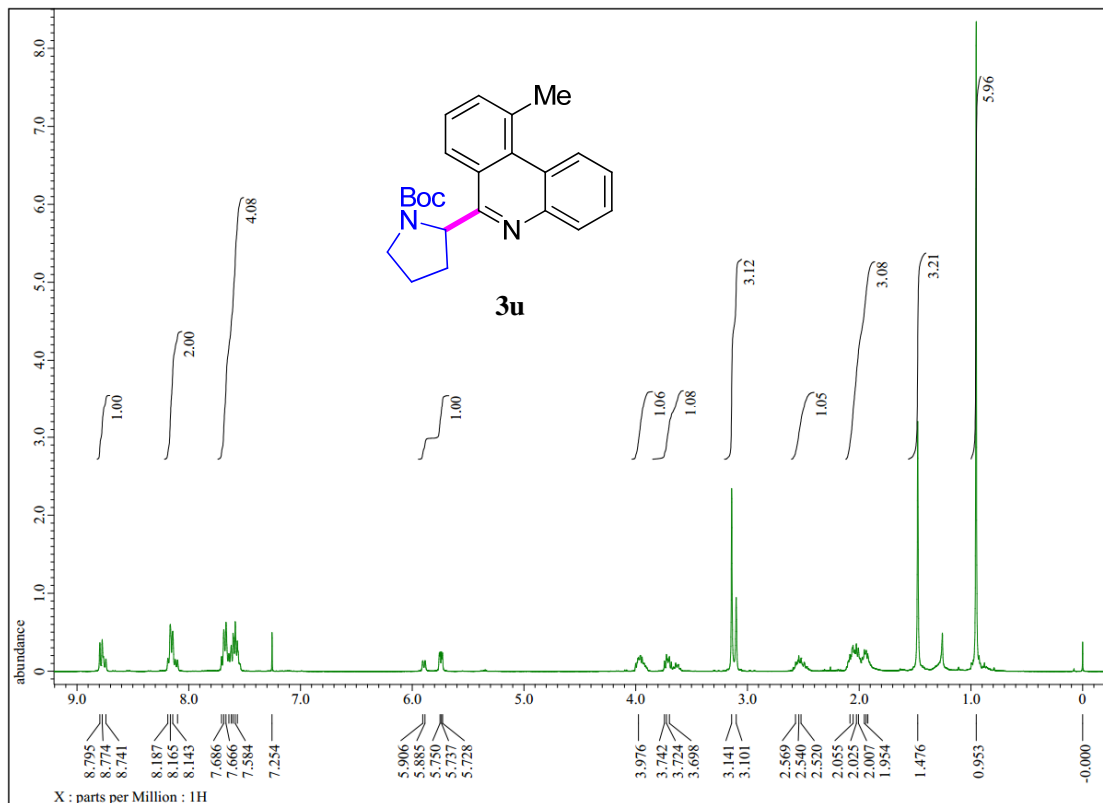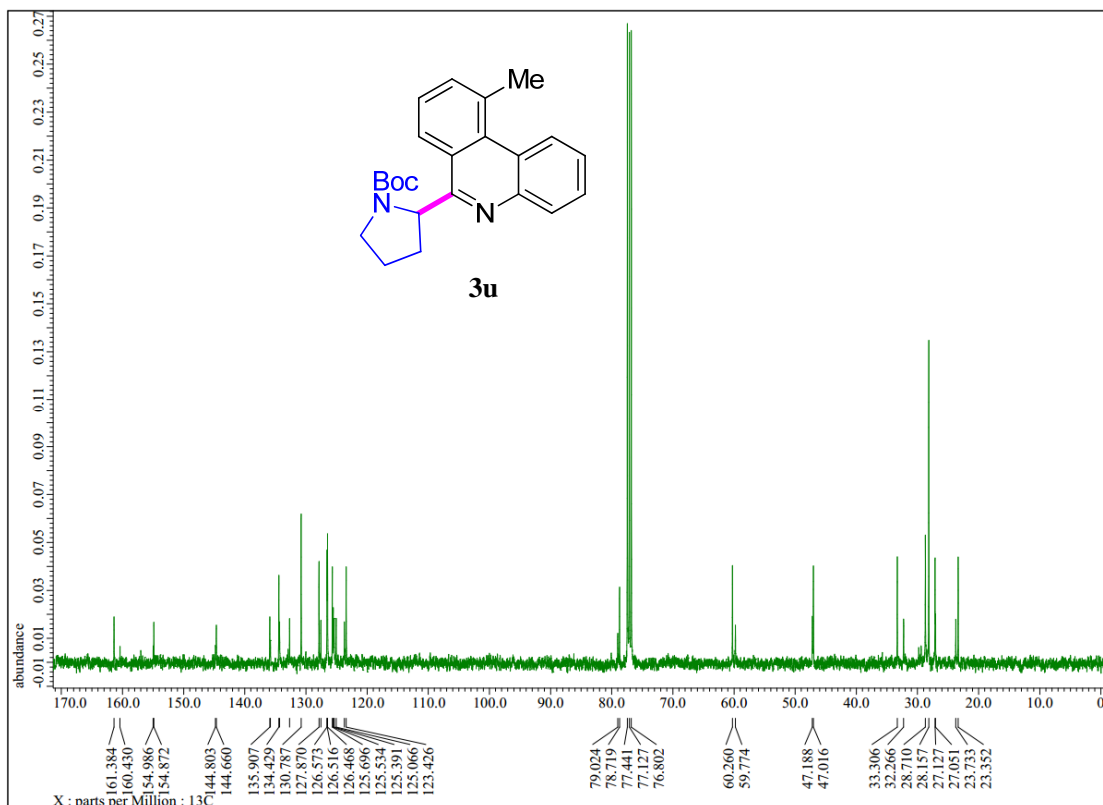

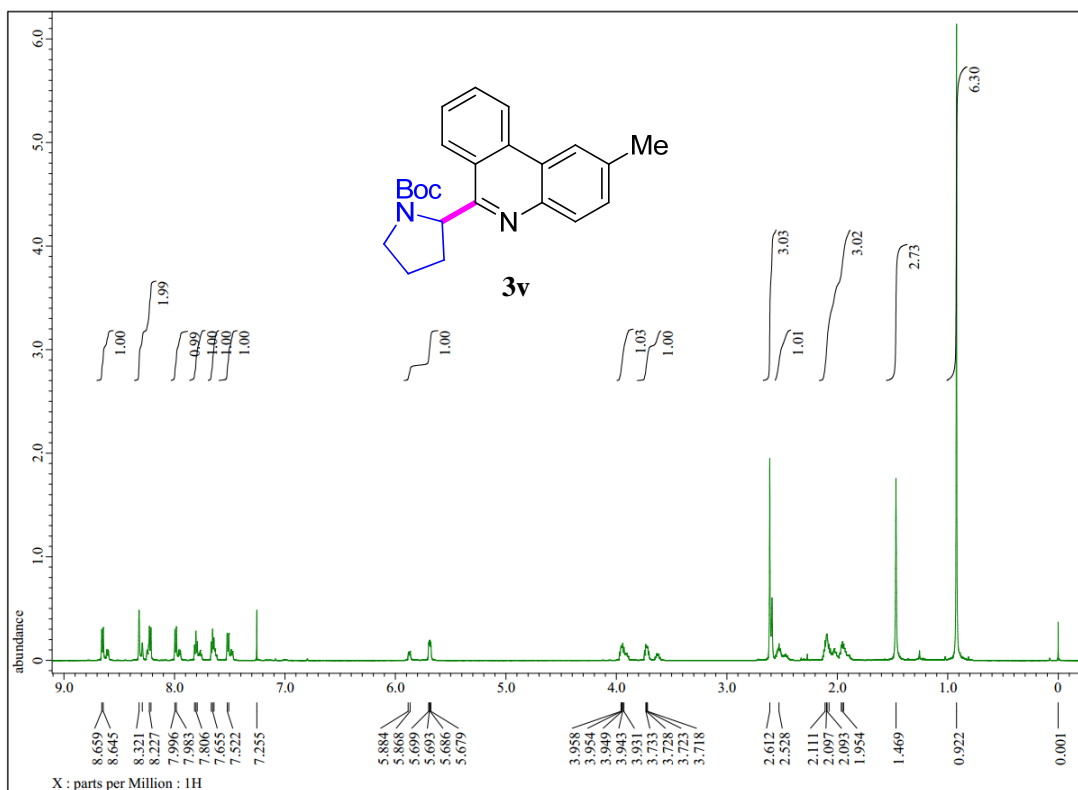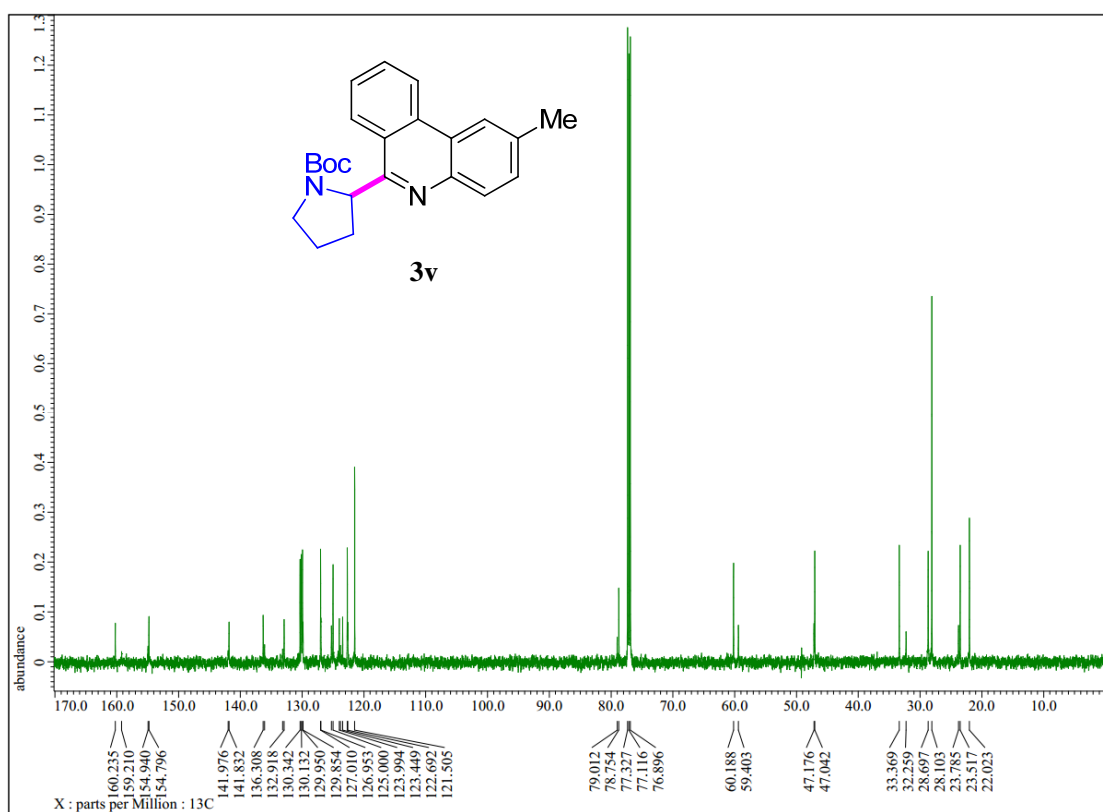

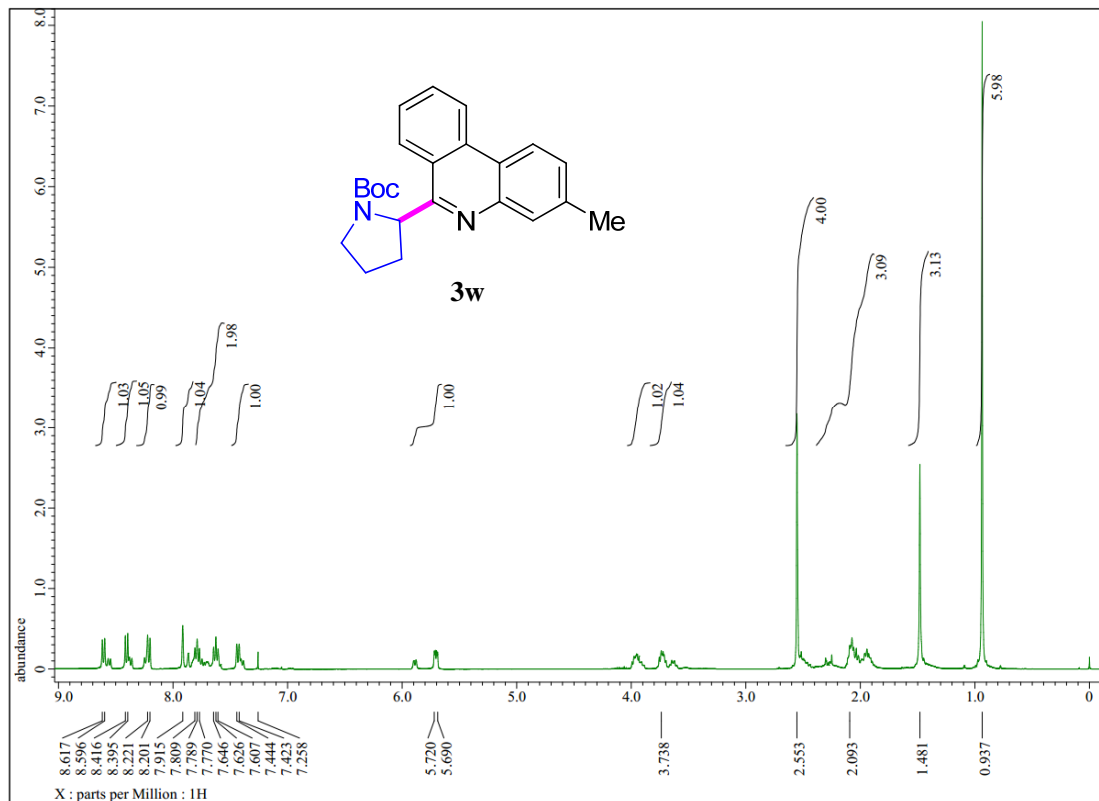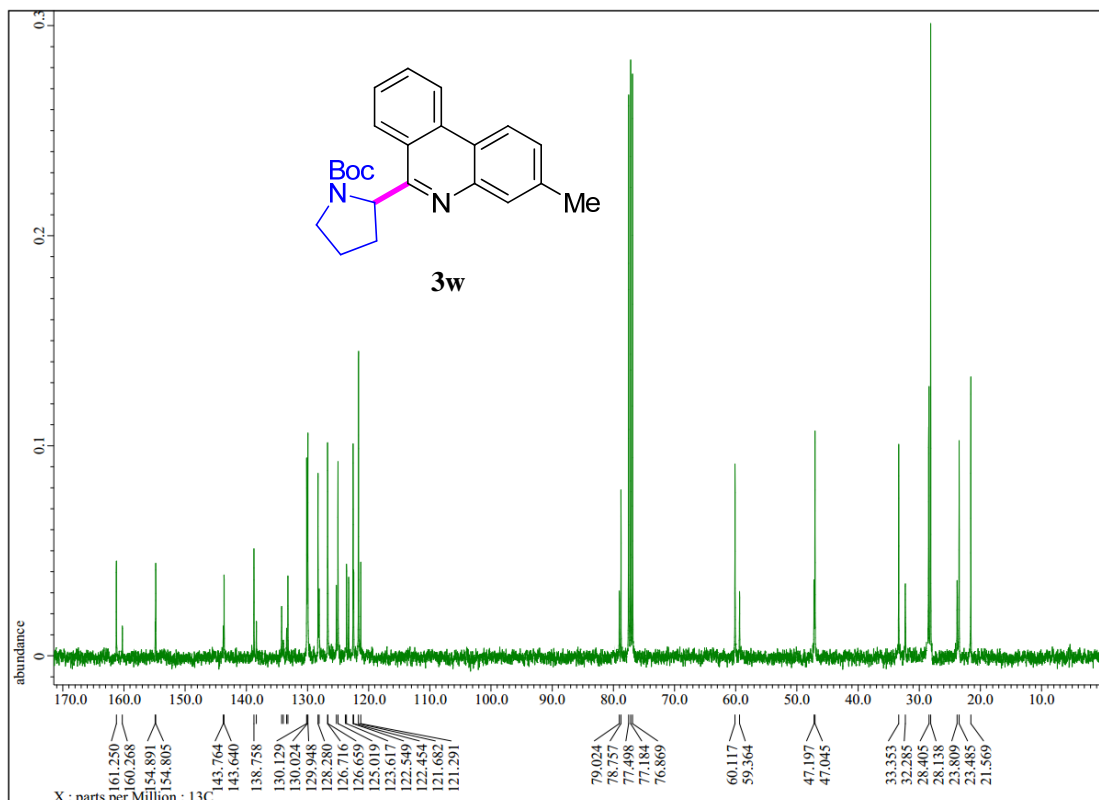

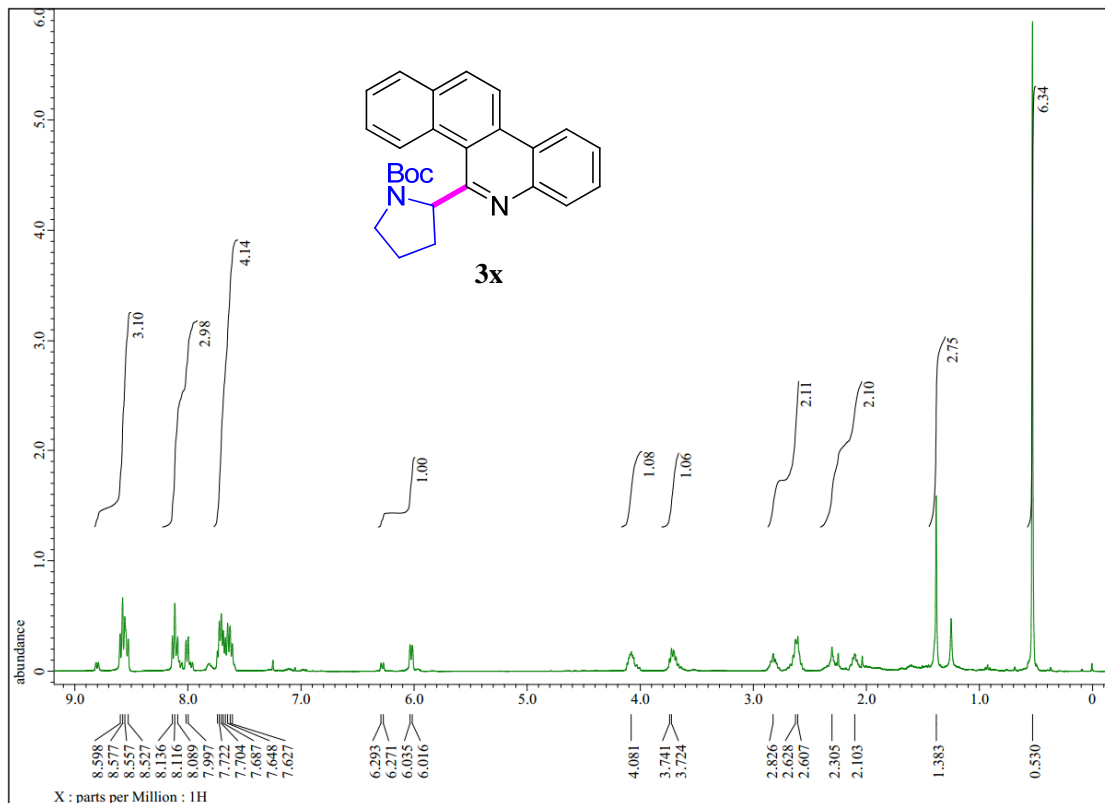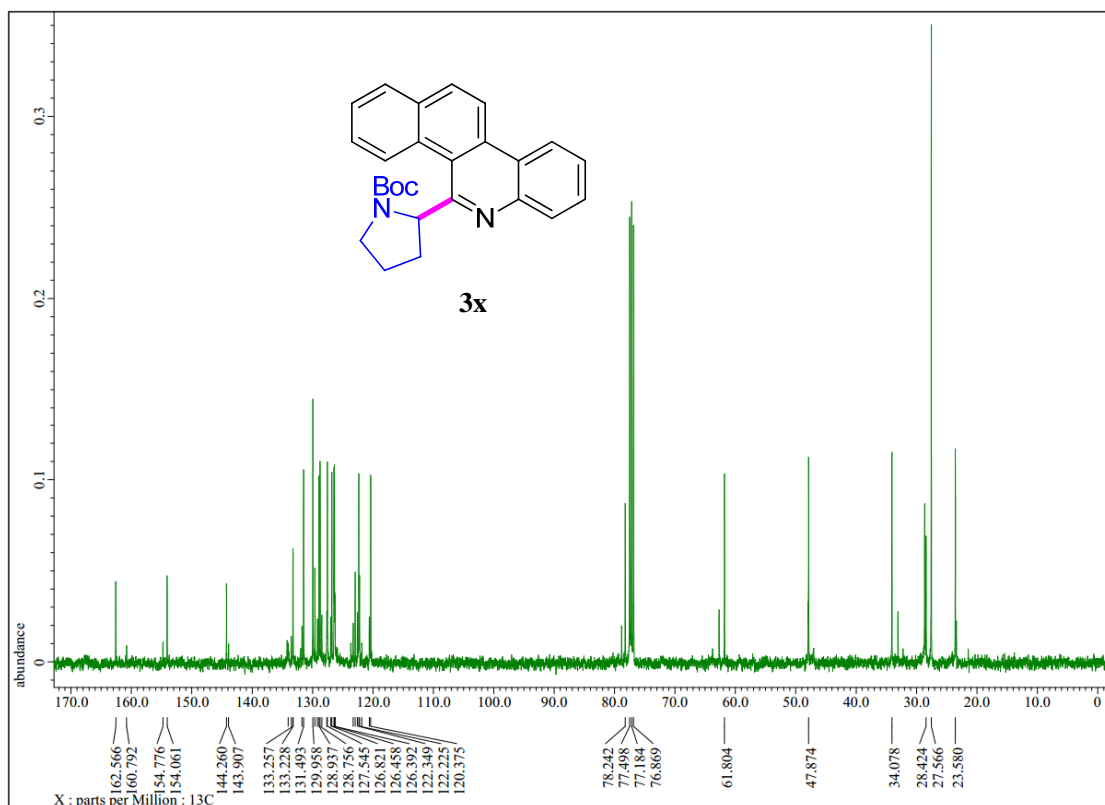

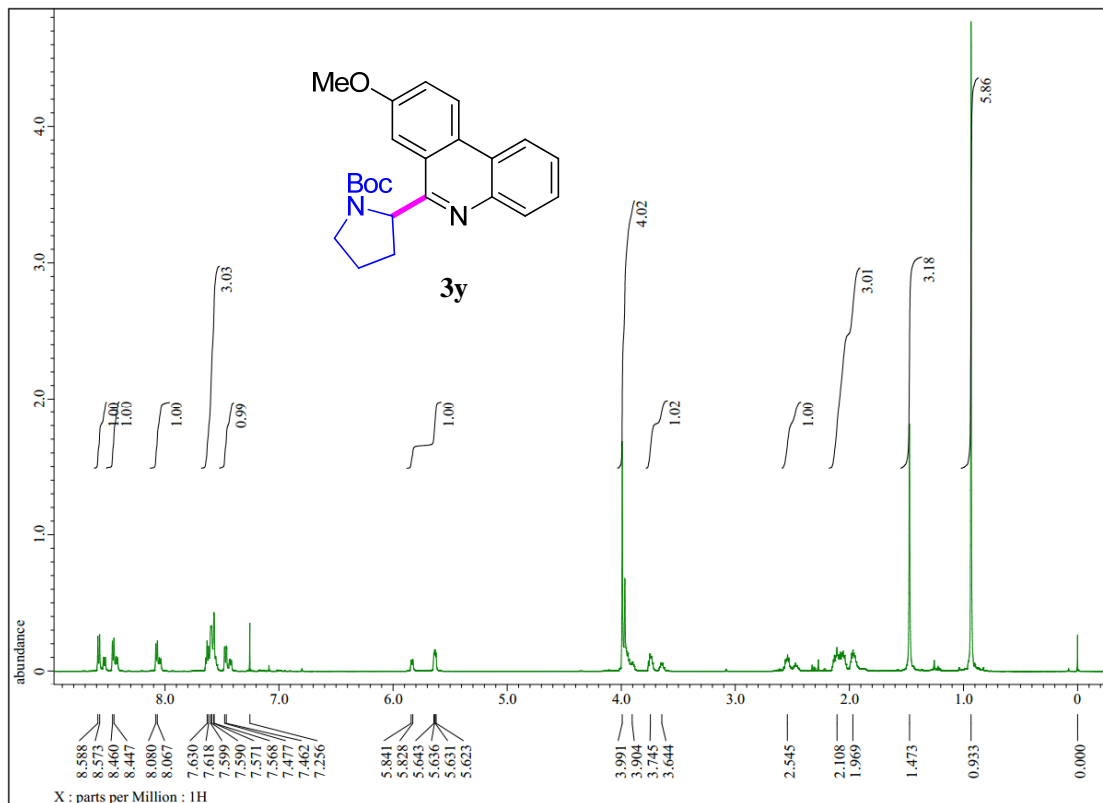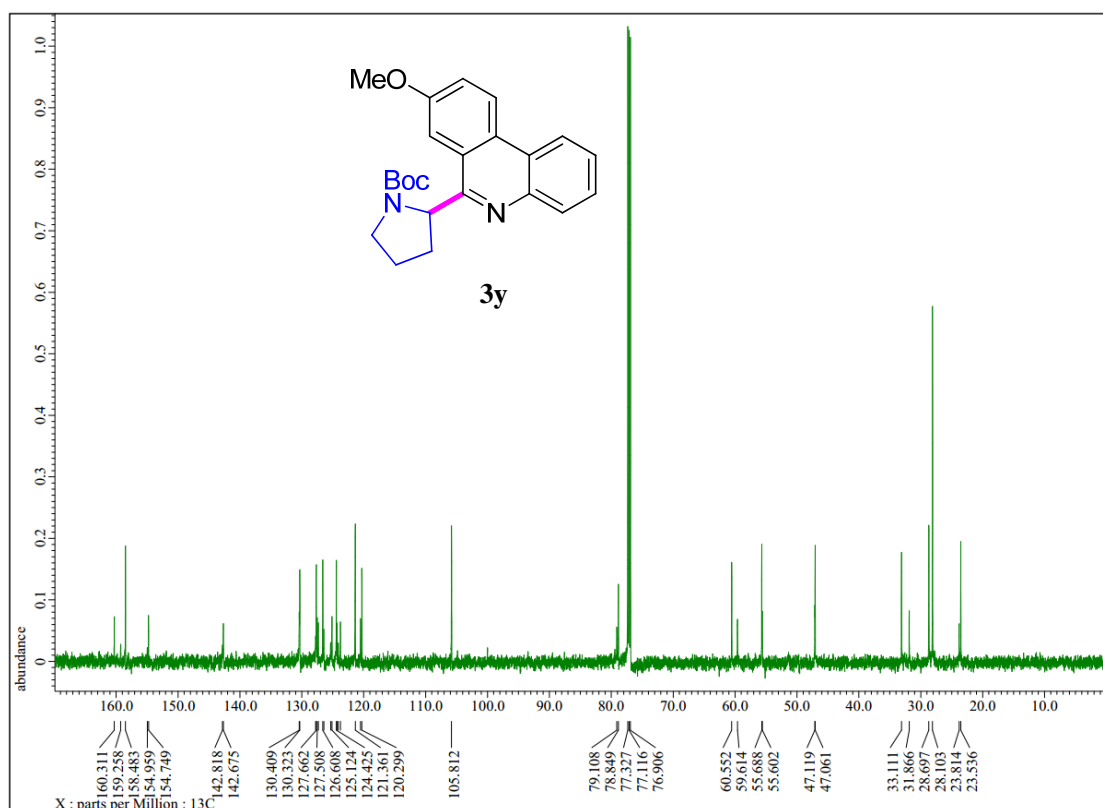

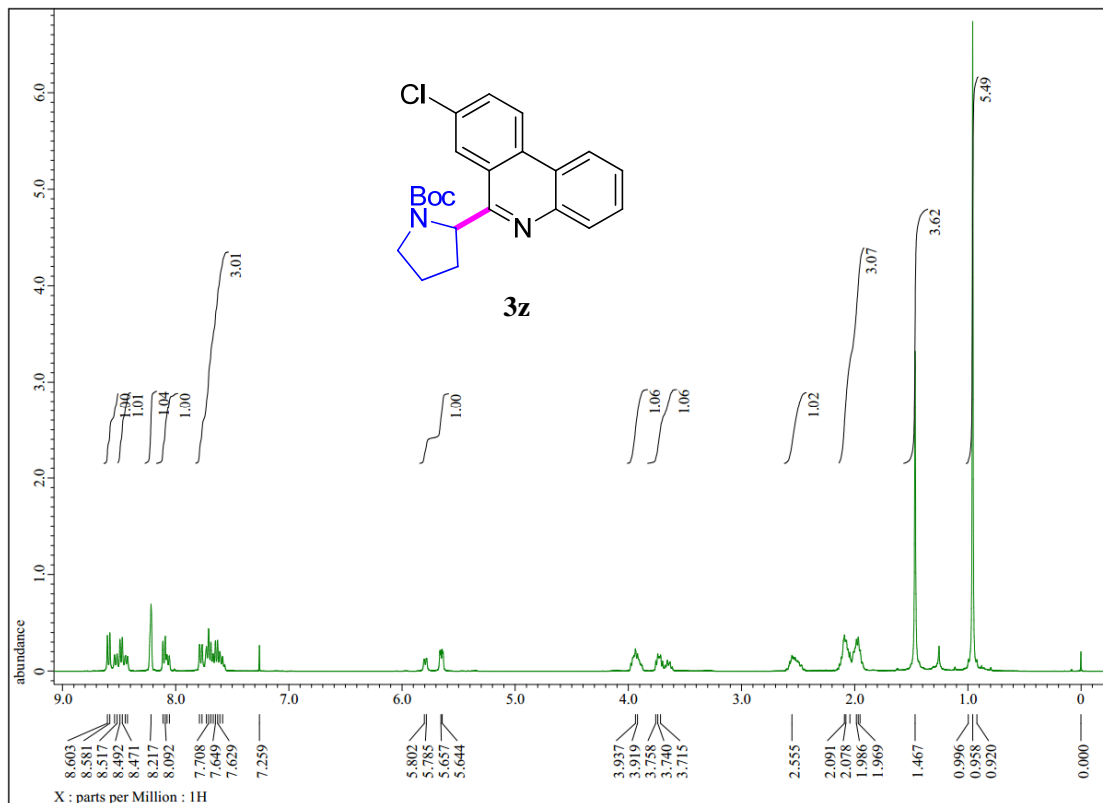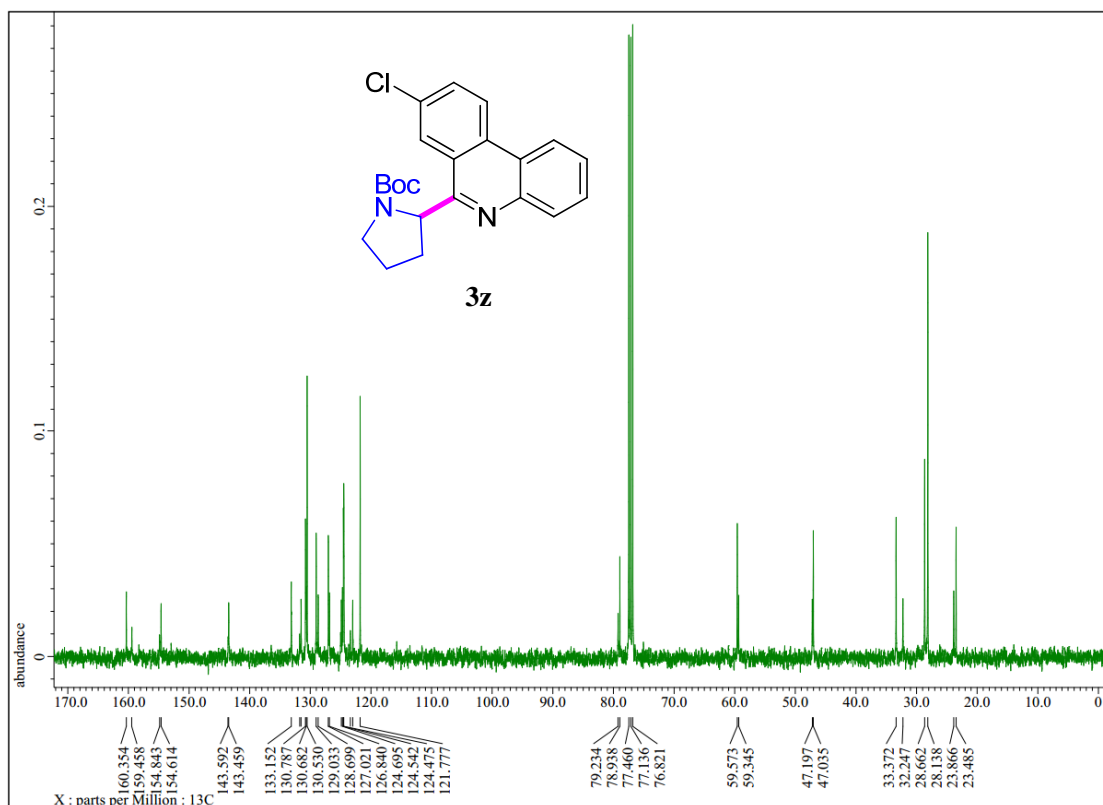

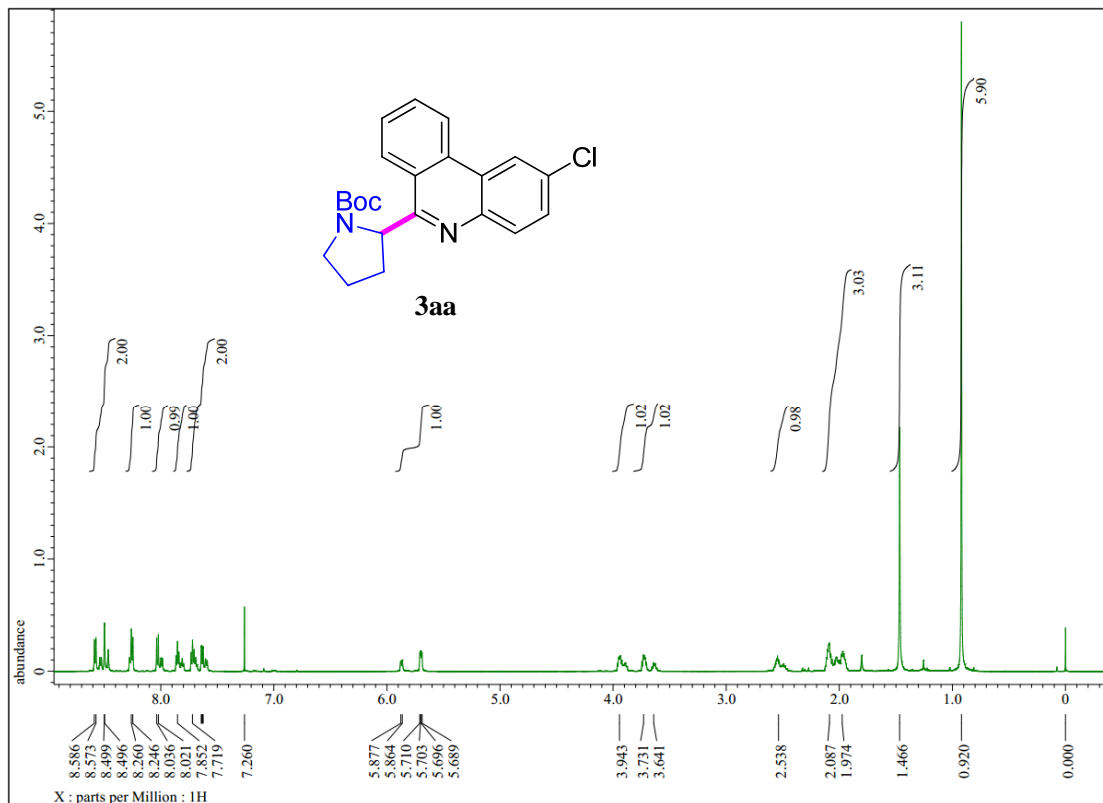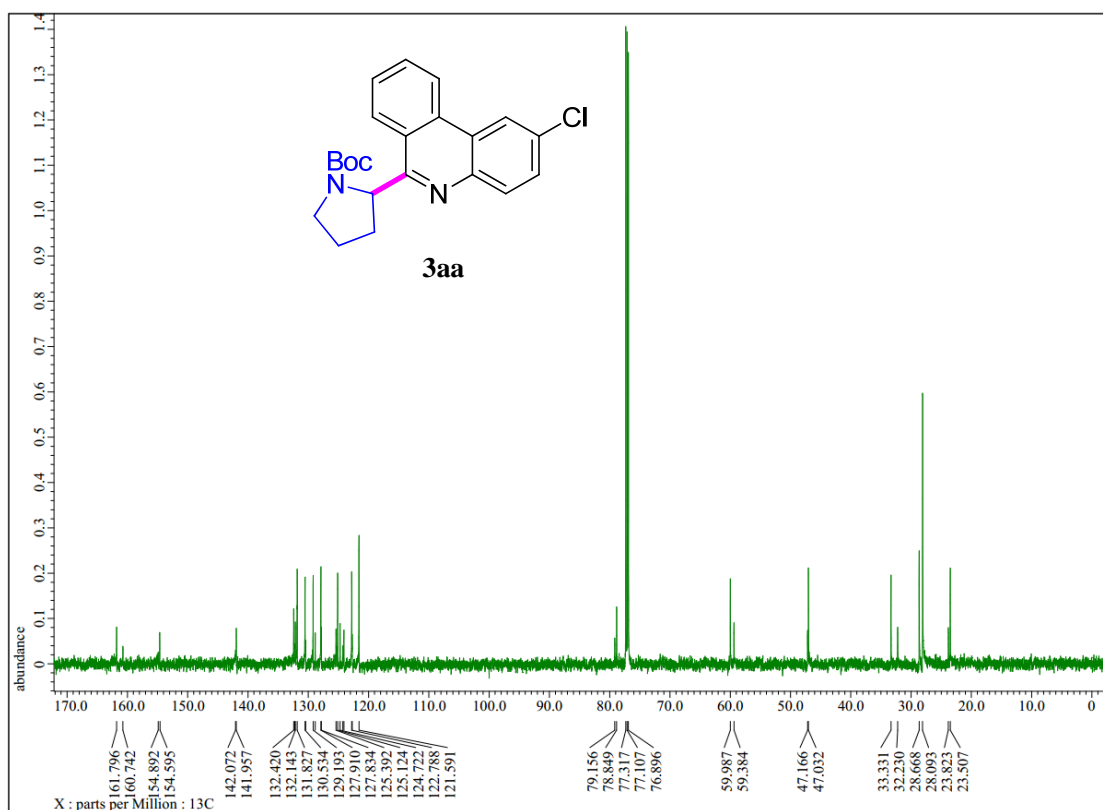



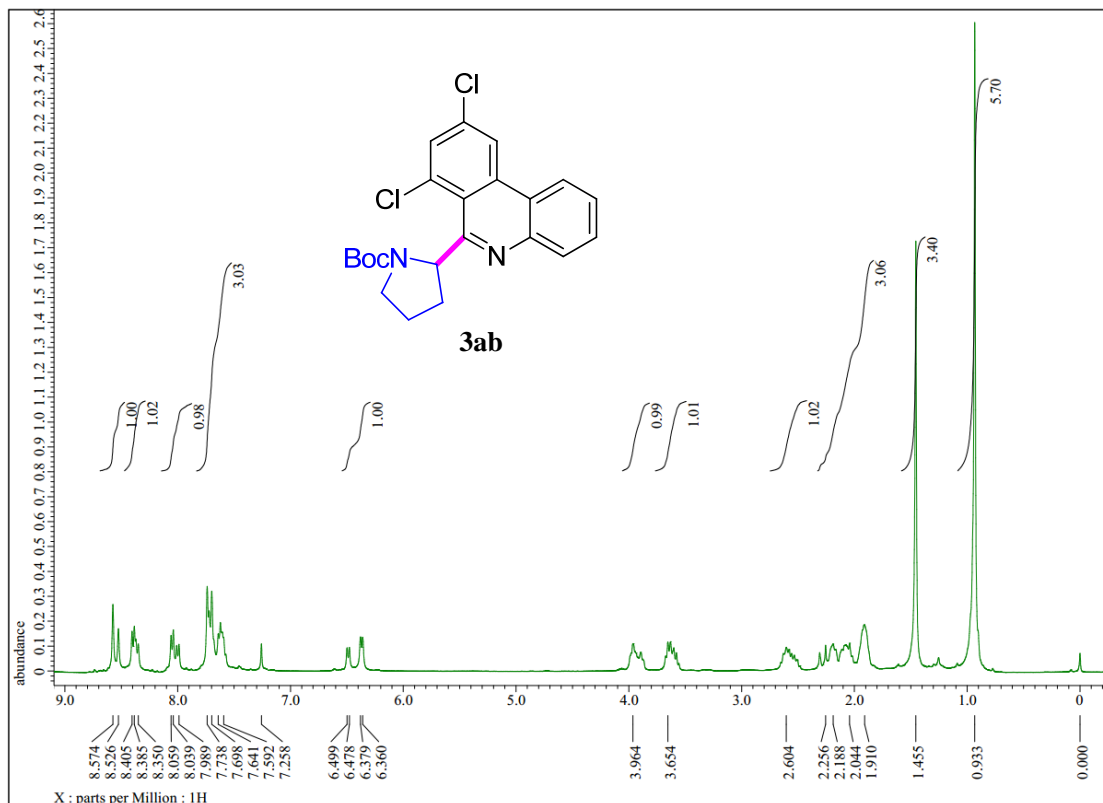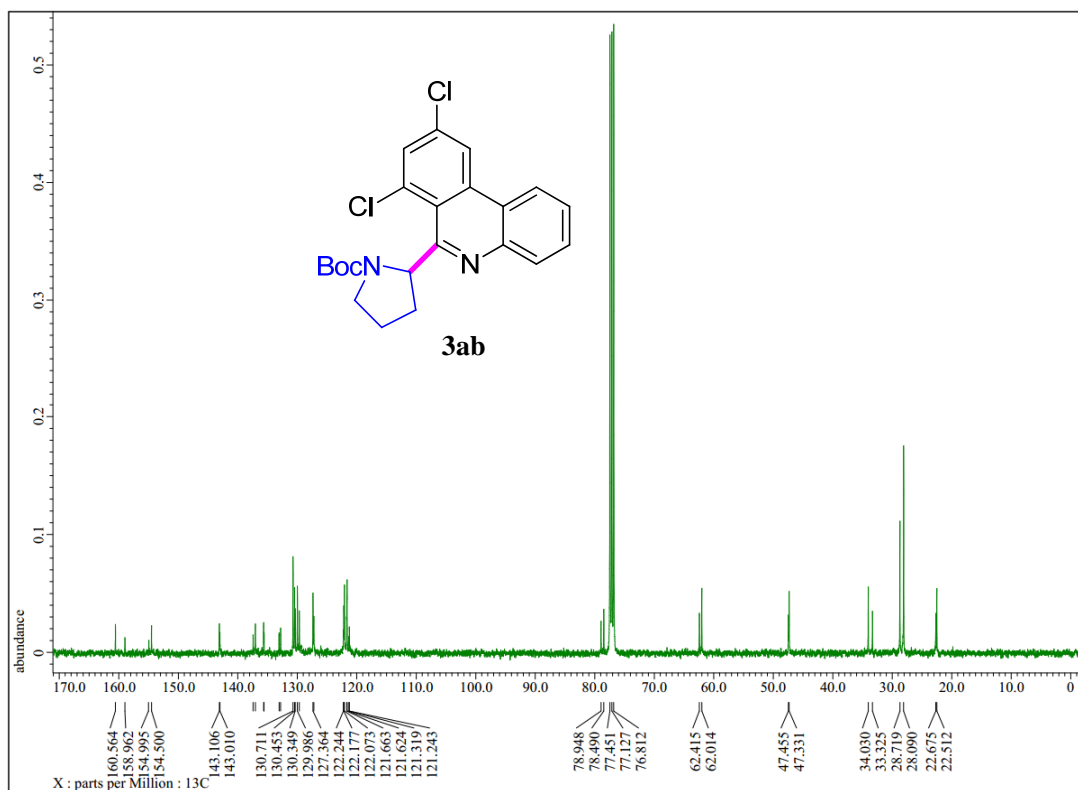

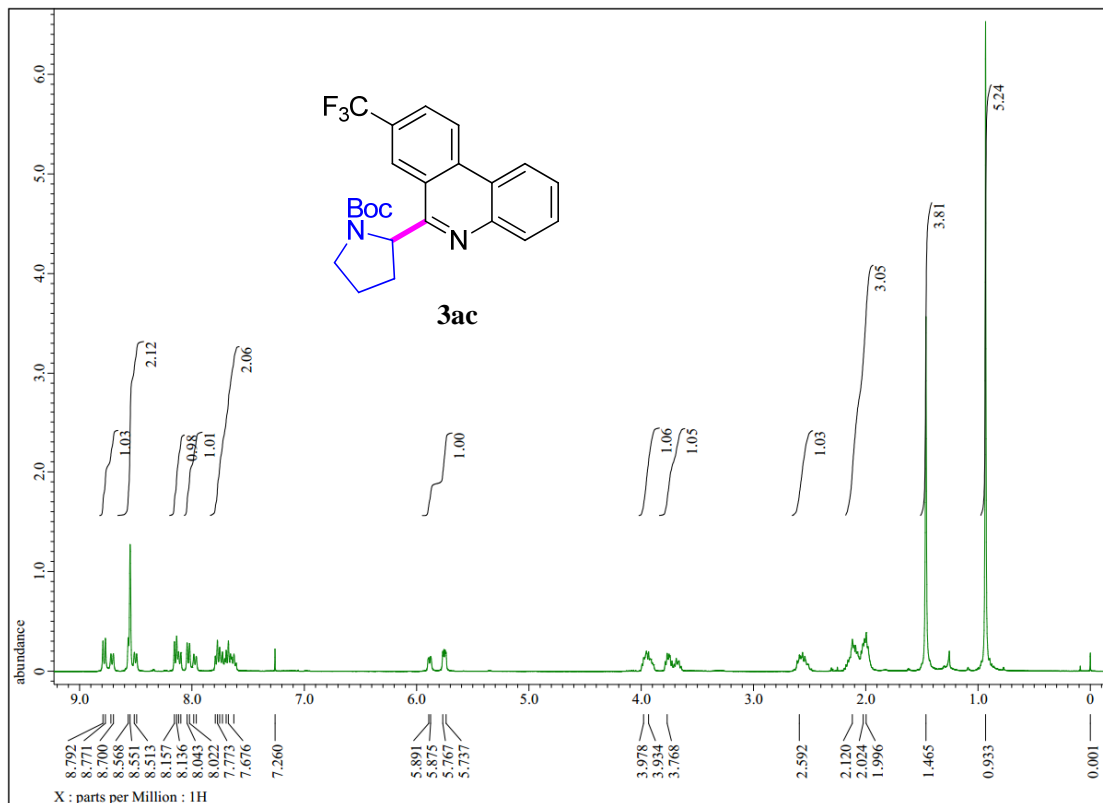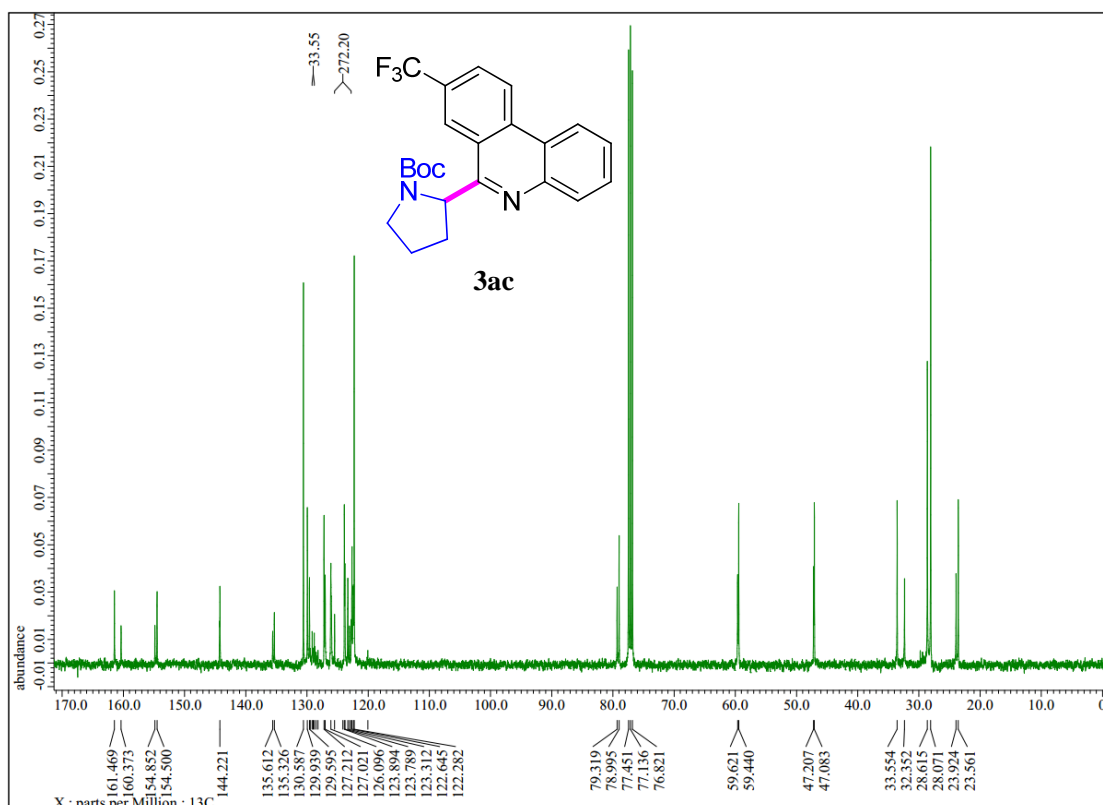

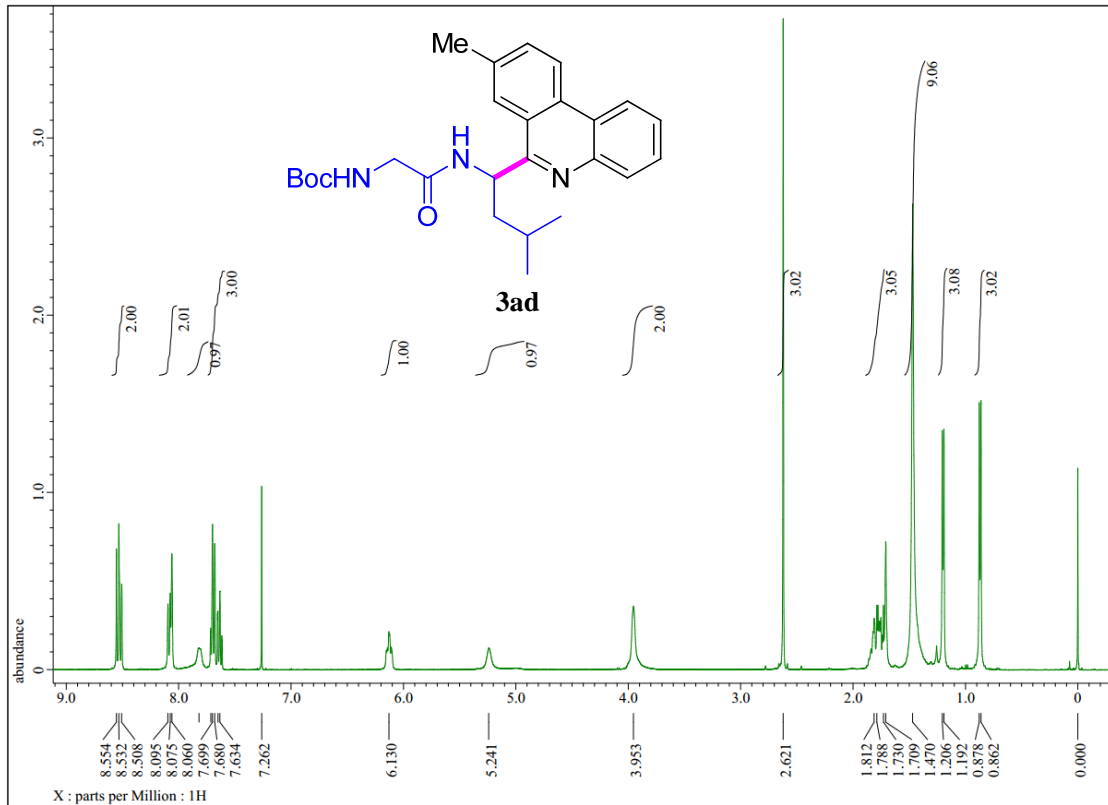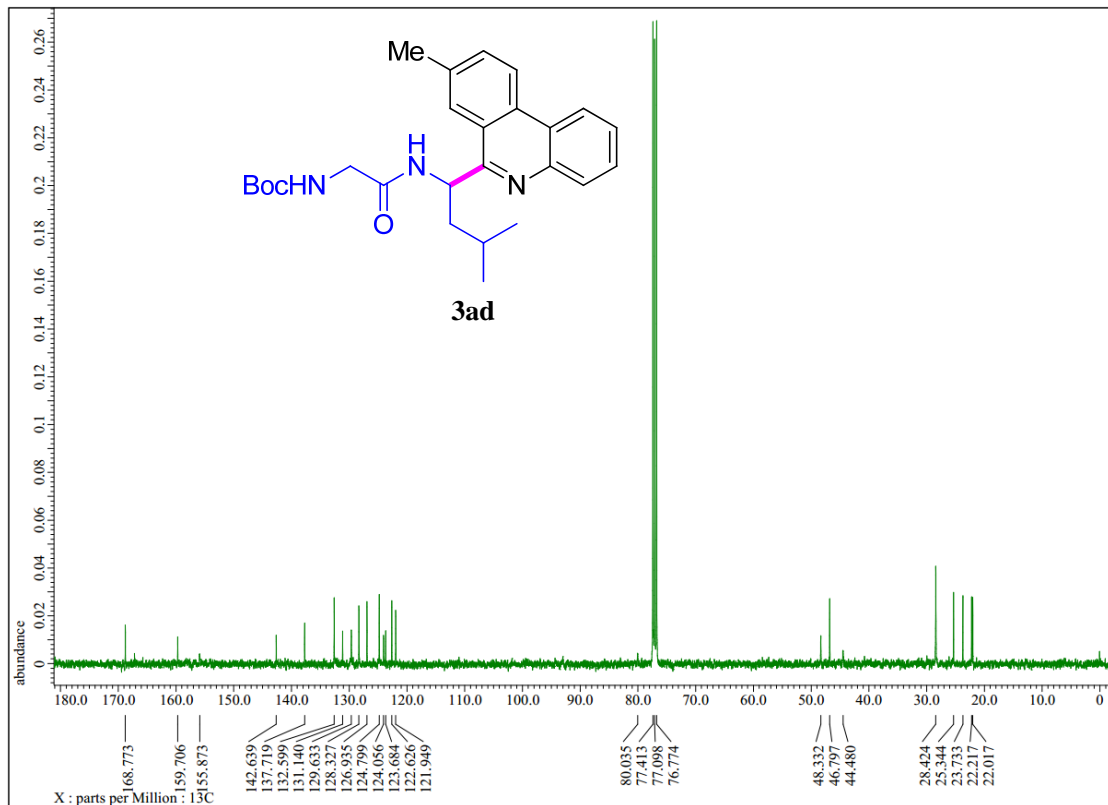

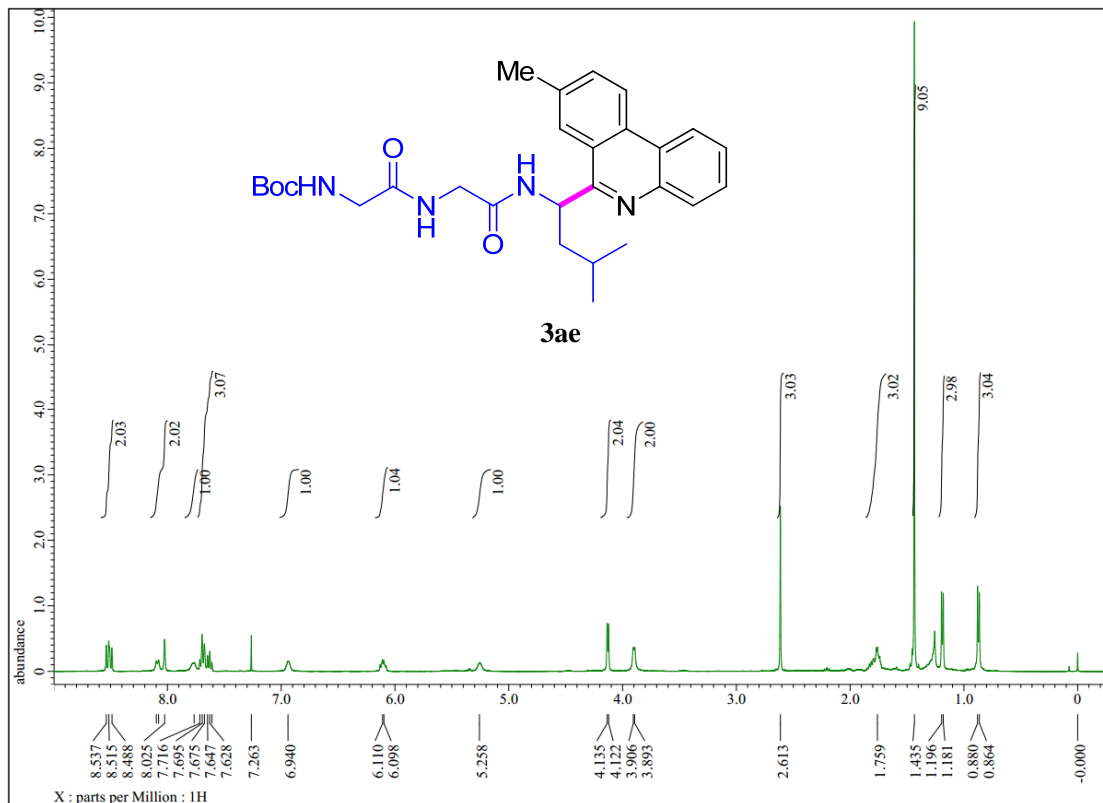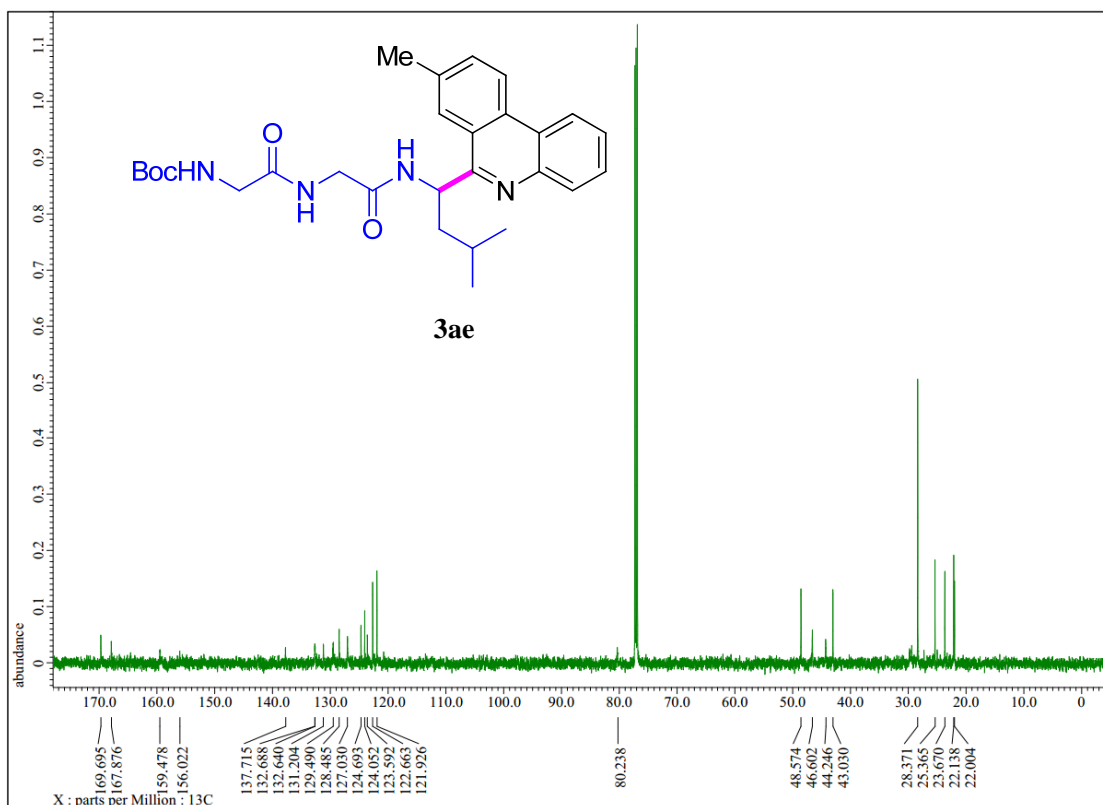

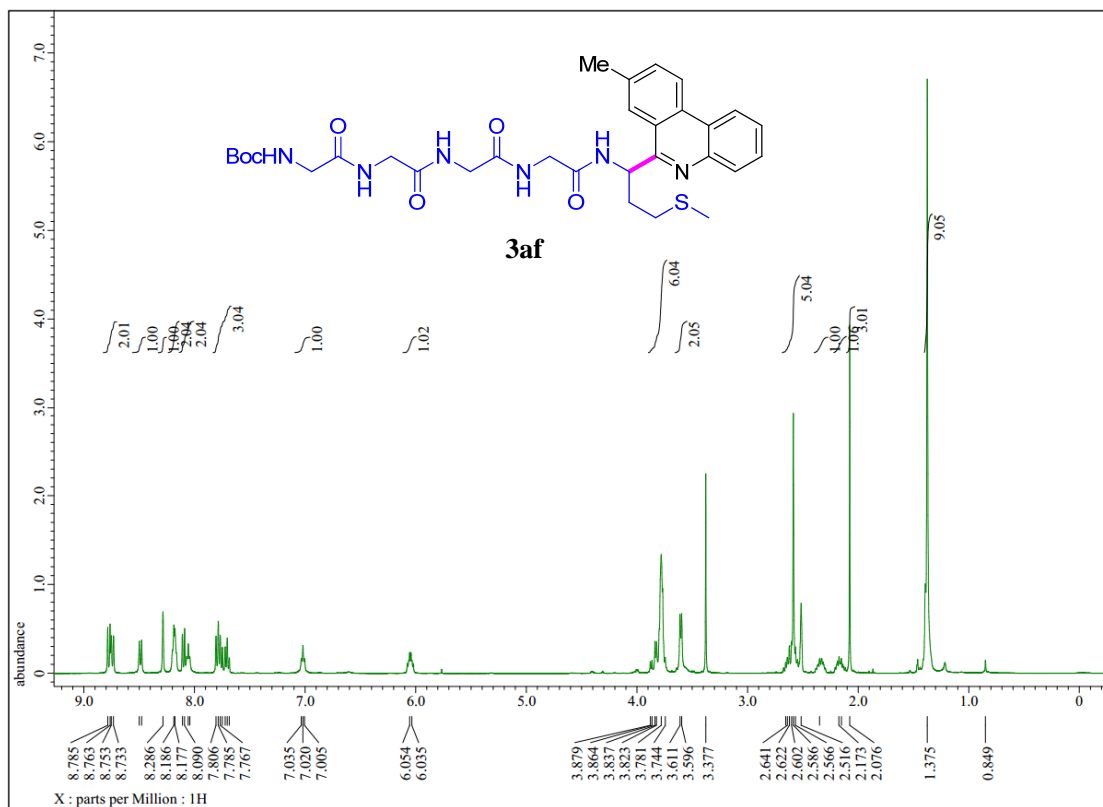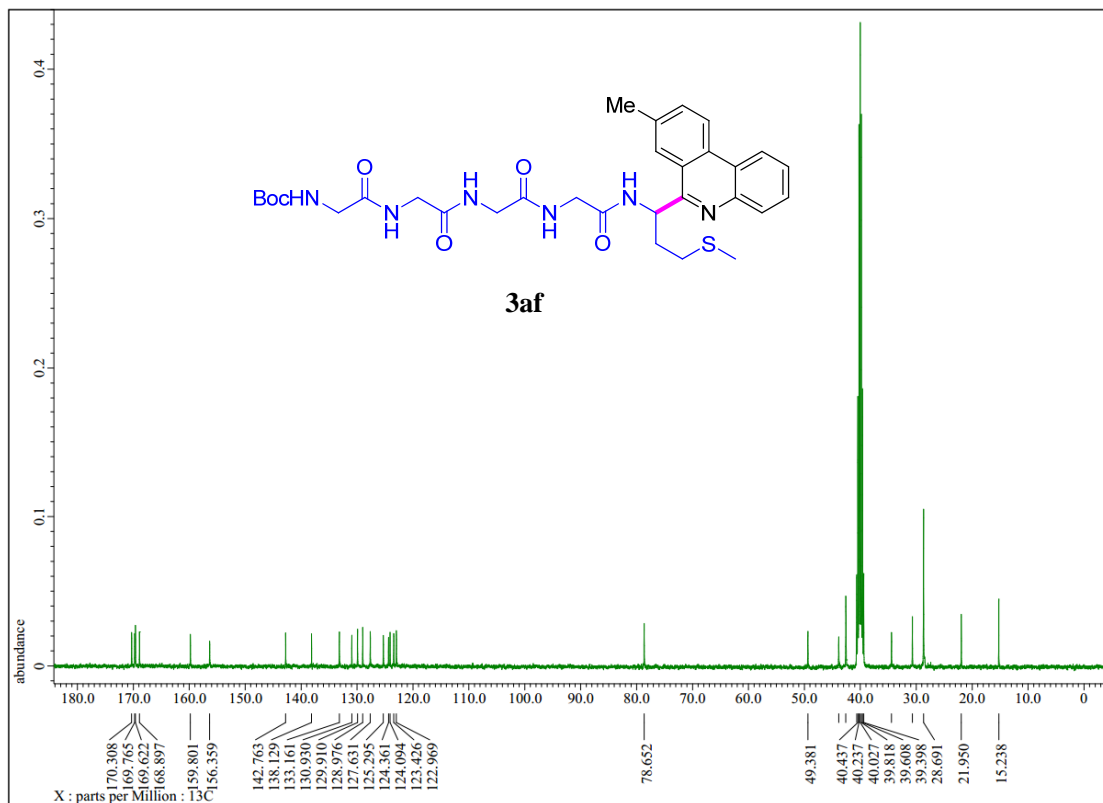

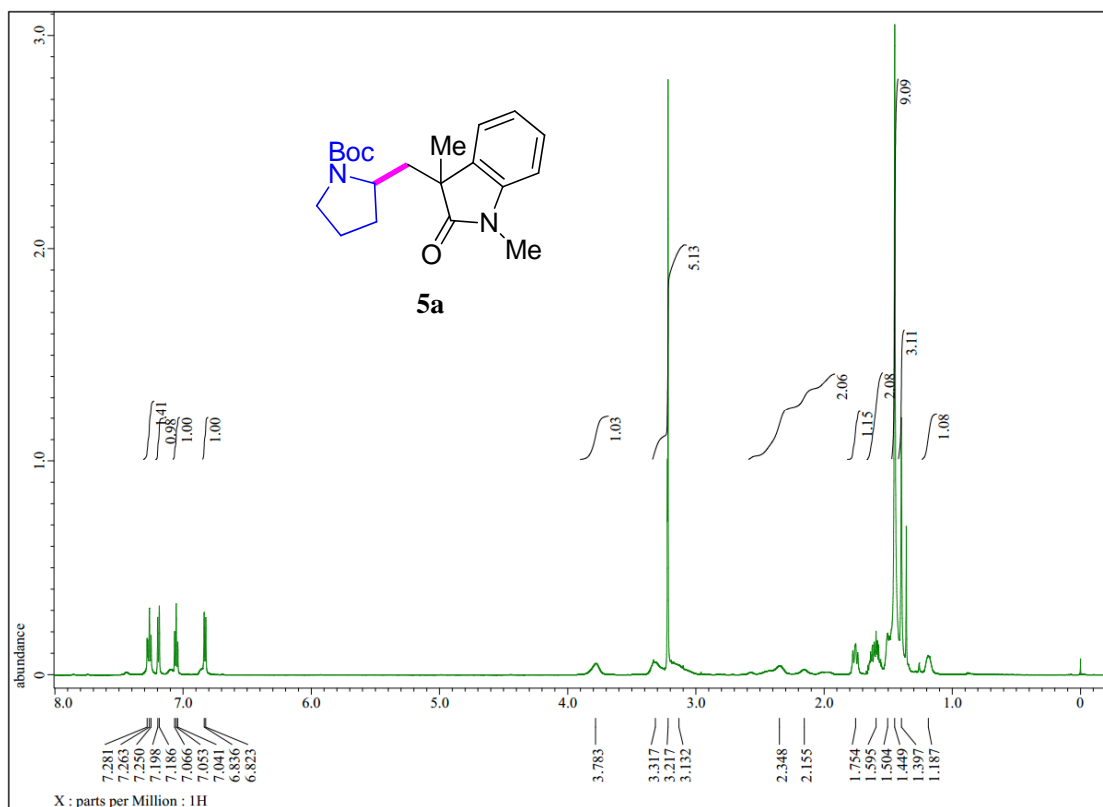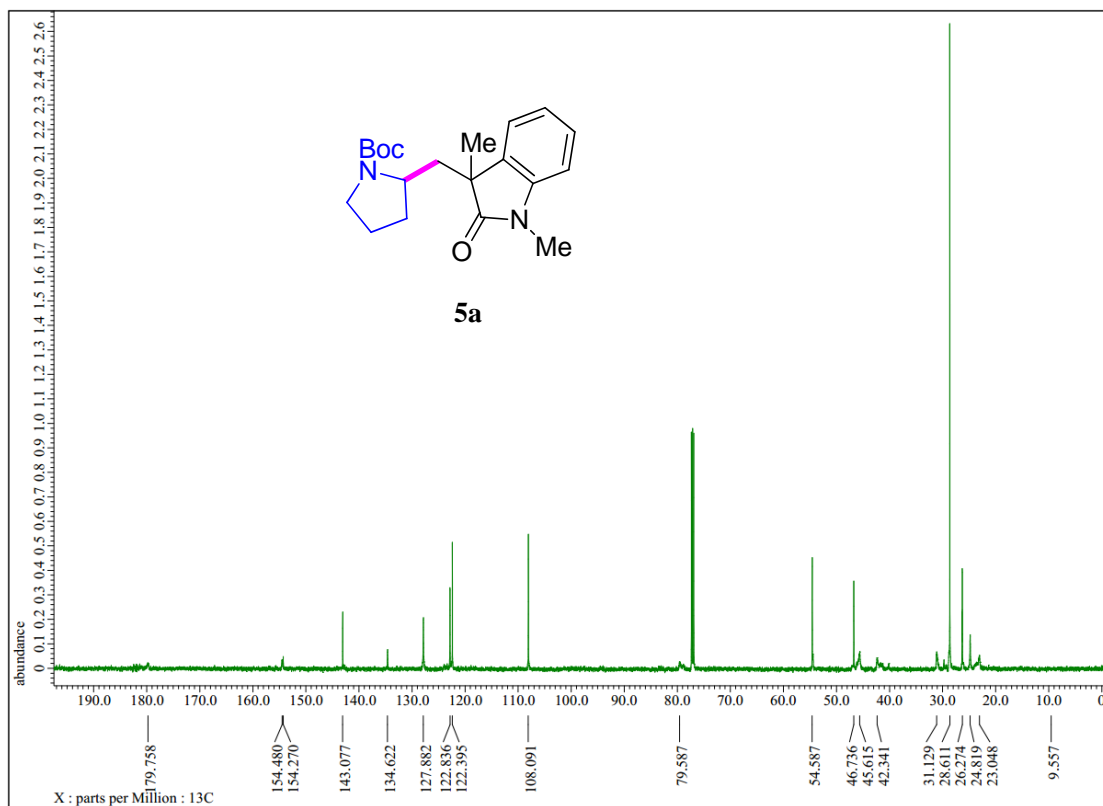

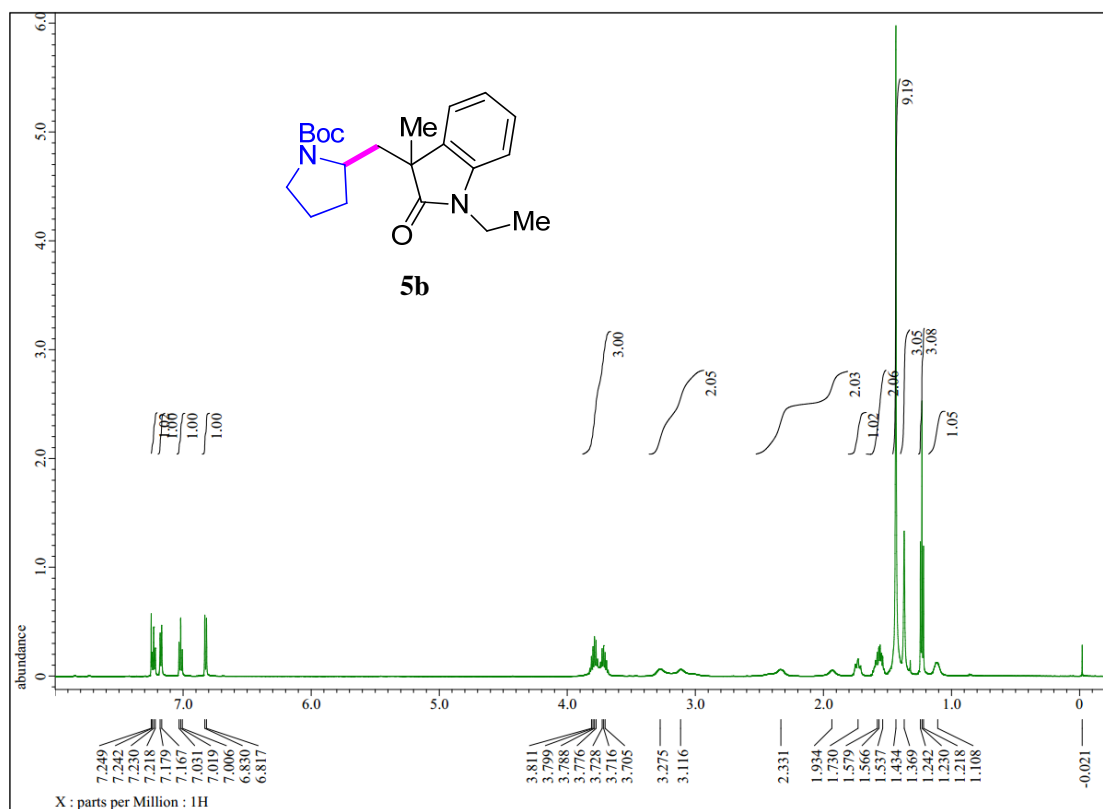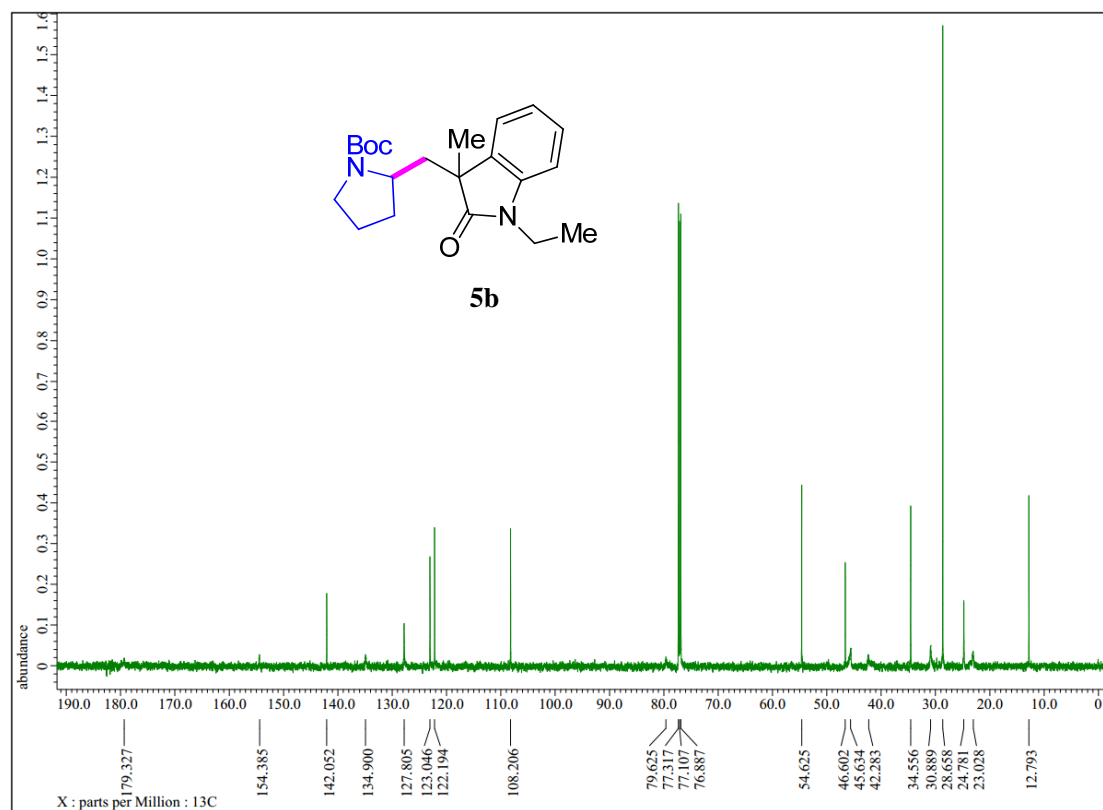

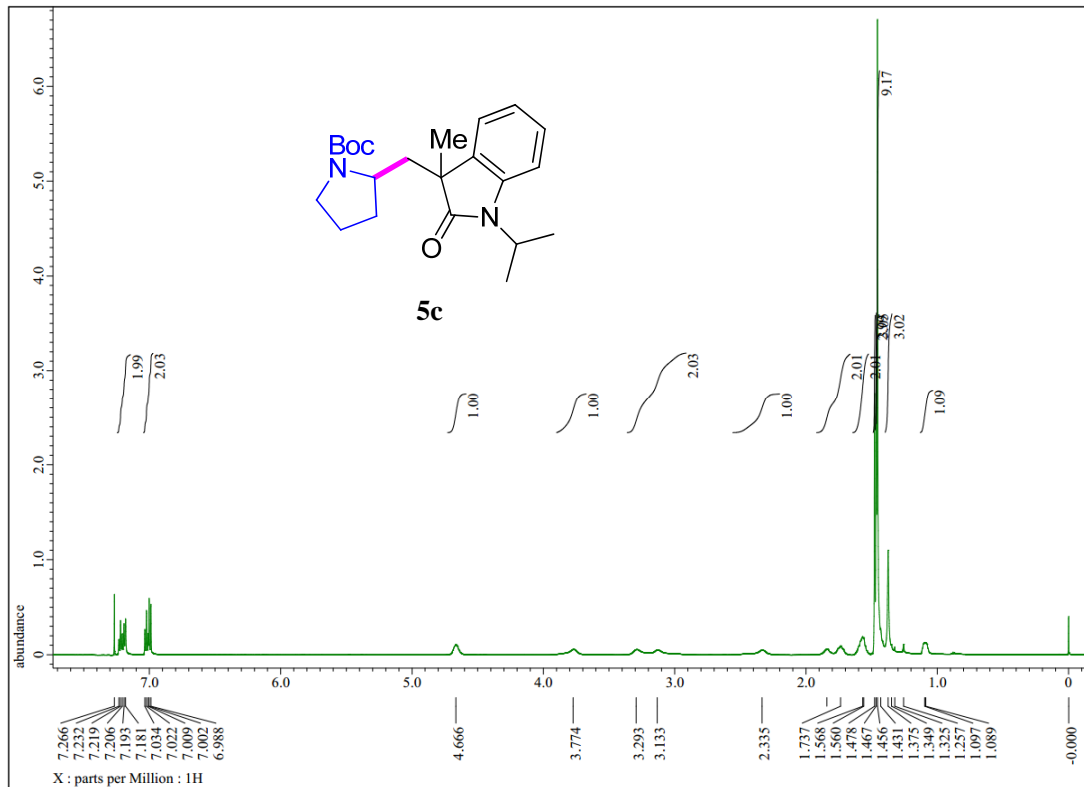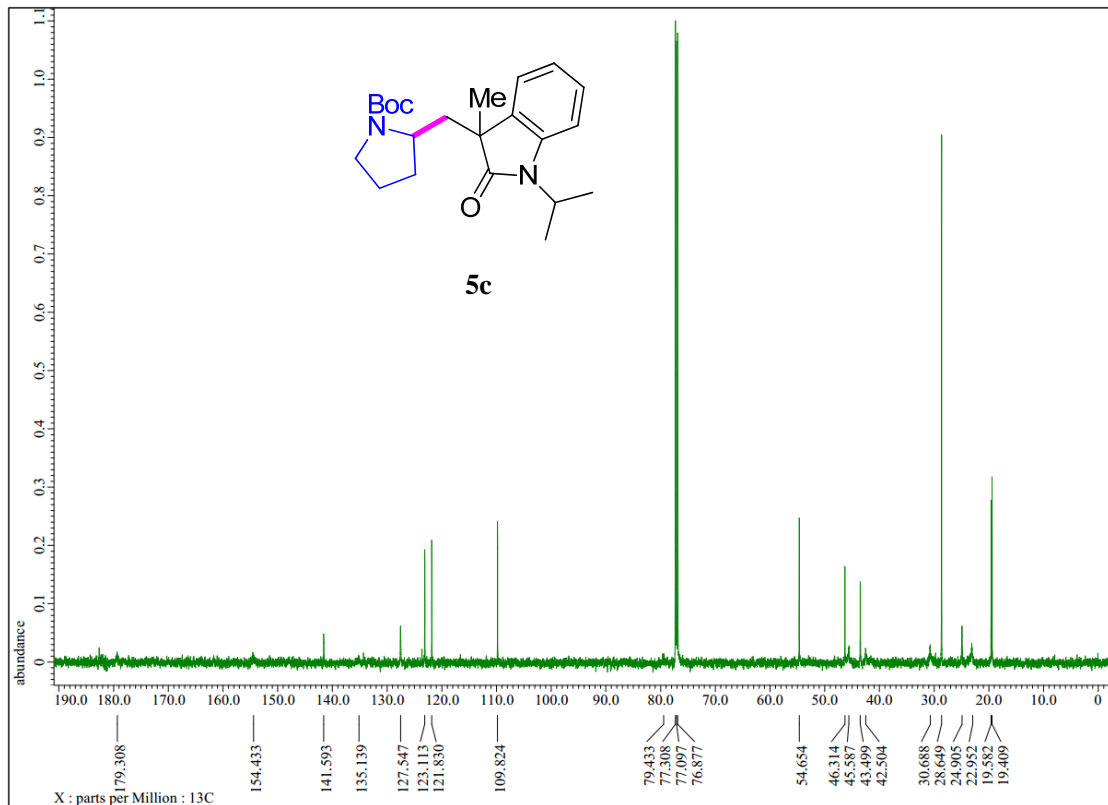



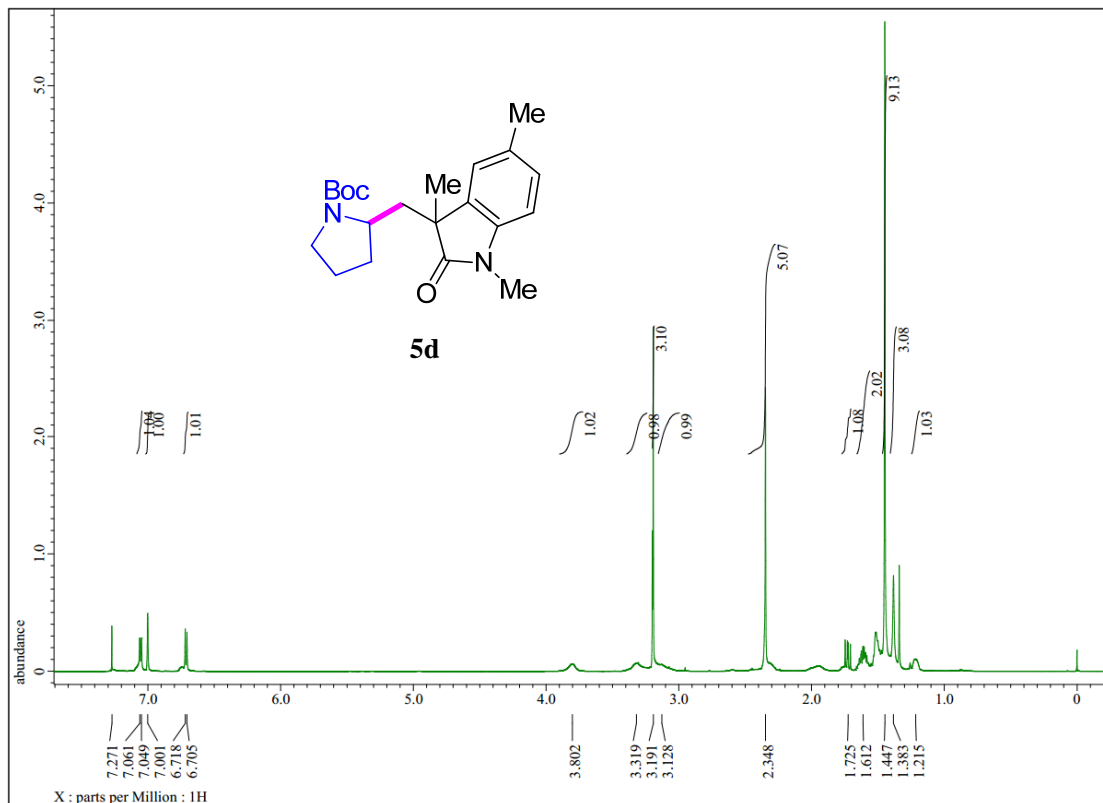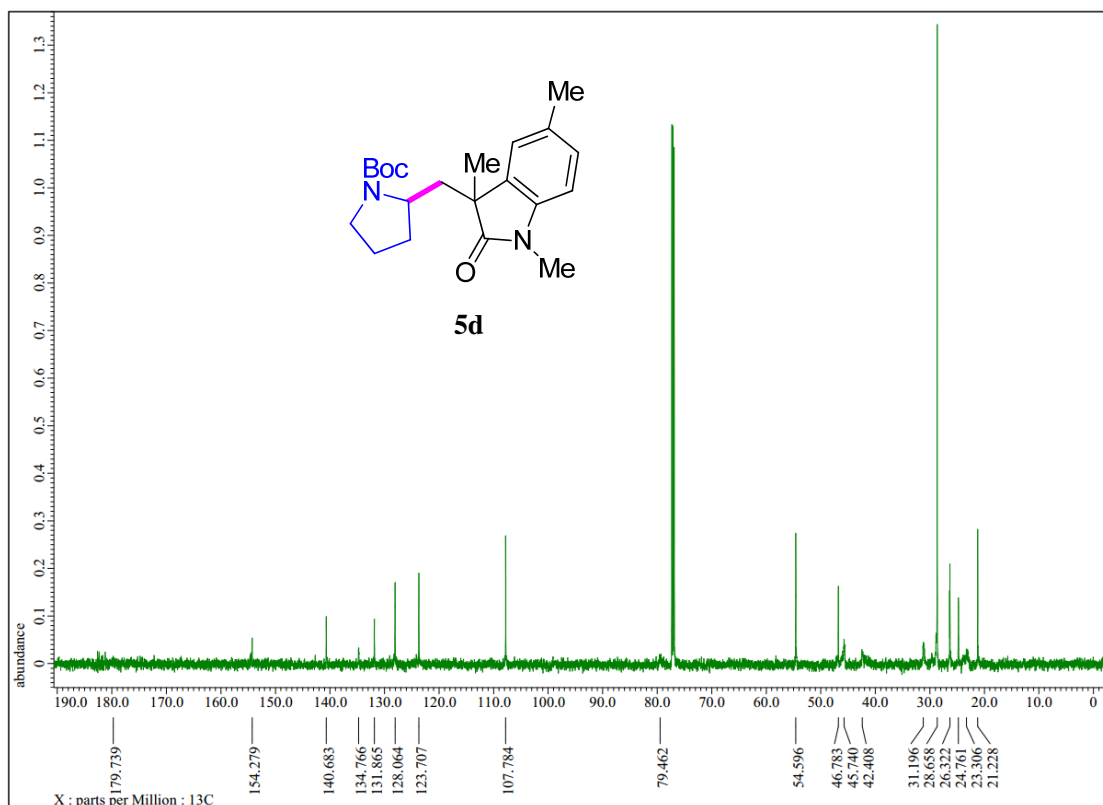

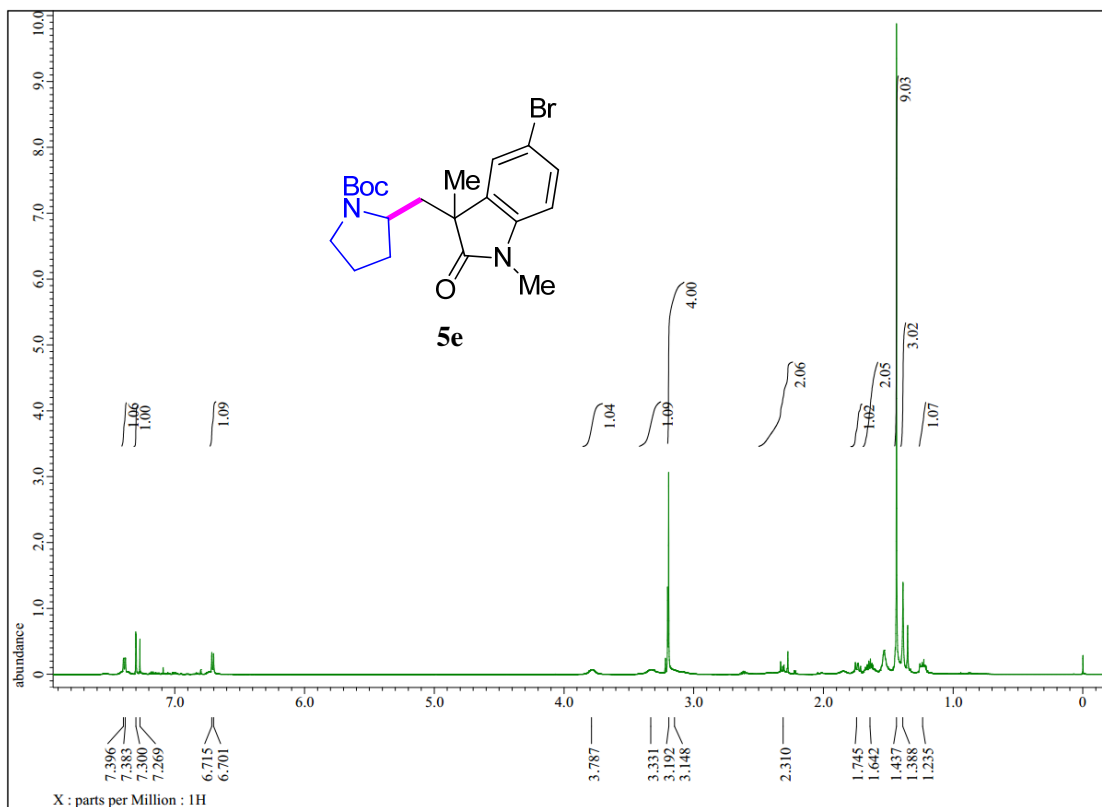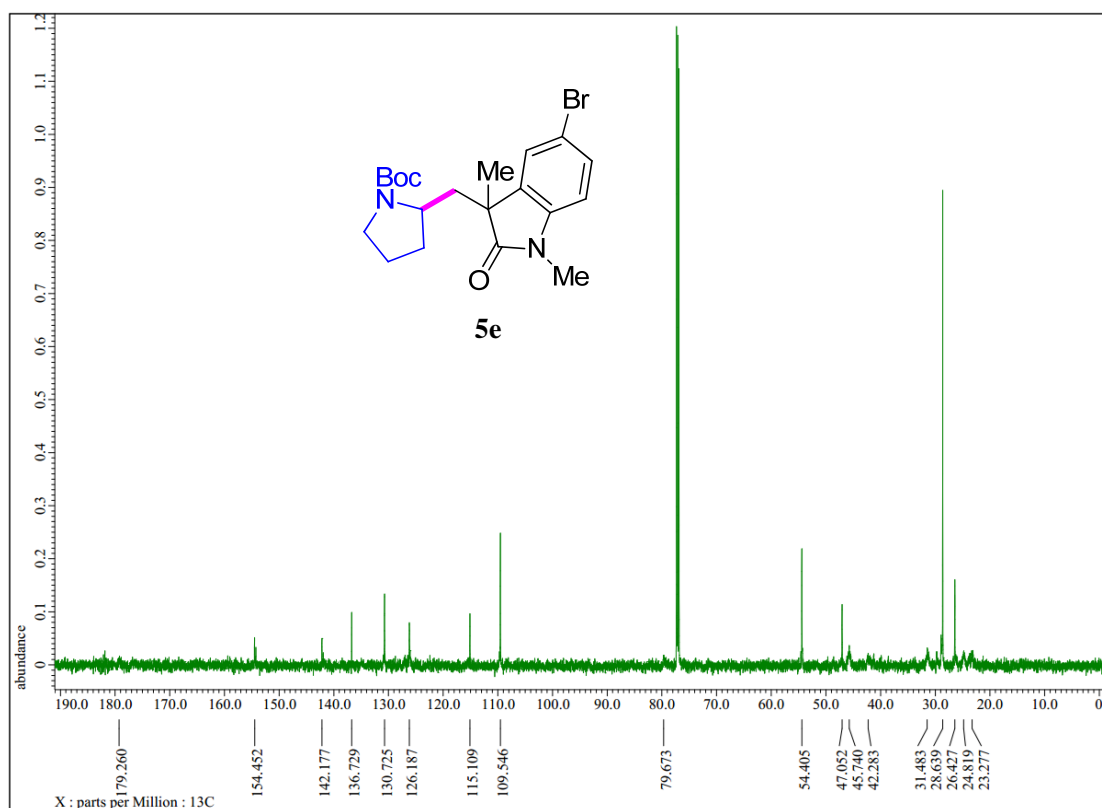

Supplement: srep20068-s1.pdf [file srep20068-s1.pdf]
